# Supplementary material for: Raritas: a program for counting high diversity categorical data with highly unequal abundances
Source: PeerJ. 2018 Oct 9;6:e5453. doi: 10.7717/peerj.5453 (PMC6183511; doi:10.7717/peerj.5453)
Supplement: Supplemental Information 1 — Archive (zip format) with detailed user guide, installation tips, example configuration and output files, and detailed definition of currently defined versions of the SOD format. [file peerj-06-5453-s001.zip]

Archive with 35 entries (26 files):
- Appendix 1 - User Guides/
- Appendix 1 - User Guides/.DS_Store
- __MACOSX/
- __MACOSX/Appendix 1 - User Guides/
- __MACOSX/Appendix 1 - User Guides/._.DS_Store
- Appendix 1 - User Guides/Install instructions for Raritas python script.txt
- __MACOSX/Appendix 1 - User Guides/._Install instructions for Raritas python script.txt
- Appendix 1 - User Guides/User Guide for Raritas app.pdf
- __MACOSX/Appendix 1 - User Guides/._User Guide for Raritas app.pdf
- __MACOSX/._Appendix 1 - User Guides
- Appendix 2 - Sample files/
- Appendix 2 - Sample files/.DS_Store
- __MACOSX/Appendix 2 - Sample files/
- __MACOSX/Appendix 2 - Sample files/._.DS_Store
- Appendix 2 - Sample files/Example configuration file - Antarctic Neogene radiolarians tsv.txt
- __MACOSX/Appendix 2 - Sample files/._Example configuration file - Antarctic Neogene radiolarians tsv.txt
- Appendix 2 - Sample files/Sample output file - SOD v2.1 file Ocean drilling section.ods
- __MACOSX/Appendix 2 - Sample files/._Sample output file - SOD v2.1 file Ocean drilling section.ods
- Appendix 2 - Sample files/Sample output file - SODv2.1 Land section.ods
- __MACOSX/Appendix 2 - Sample files/._Sample output file - SODv2.1 Land section.ods
- __MACOSX/._Appendix 2 - Sample files
- Appendix 3 - SOD definitions/
- Appendix 3 - SOD definitions/SOD definitions dbl full.ods
- __MACOSX/Appendix 3 - SOD definitions/
- __MACOSX/Appendix 3 - SOD definitions/._SOD definitions dbl full.ods
- Appendix 3 - SOD definitions/SOD readme.txt
- __MACOSX/Appendix 3 - SOD definitions/._SOD readme.txt
- __MACOSX/._Appendix 3 - SOD definitions
- Appendix 4 - Count data and script to estimate improvement/
- Appendix 4 - Count data and script to estimate improvement/aanr.csv
- __MACOSX/Appendix 4 - Count data and script to estimate improvement/
- __MACOSX/Appendix 4 - Count data and script to estimate improvement/._aanr.csv
- Appendix 4 - Count data and script to estimate improvement/rarefying AANR.R
- __MACOSX/Appendix 4 - Count data and script to estimate improvement/._rarefying AANR.R
- __MACOSX/._Appendix 4 - Count data and script to estimate improvement
