# Supplementary material for: Raritas: a program for counting high diversity categorical data with highly unequal abundances
Source: PeerJ. 2018 Oct 9;6:e5453. doi: 10.7717/peerj.5453 (PMC6183511; doi:10.7717/peerj.5453)
Supplement: Supplemental Information 1 — Archive (zip format) with detailed user guide, installation tips, example configuration and output files, and detailed definition of currently defined versions of the SOD format. [file peerj-06-5453-s001.zip › Appendix 1 - User Guides/Install instructions for Raritas python script.txt]

Installation instructions for using Raritas.py as a script in a command line interface (CLI):

Raritas.py only requires having installed python 2.7 along with modules matplotlib and wxPython.
The following are instructions on how to install these.
It is here assumed that the user choosing to use Raritas.py as a script in a command line interface instead of using the software versions Raritas.app or Raritas.exe has a general familiarity with command line interfaces.

* On Mac OSX, although there are dozens of ways to install the needed packages to run Raritas.py (including pip, conda, port, compiling from sources, etc.), the easiest, most stable way is using homebrew (see https://brew.sh/ to install homebrew - it is usually just copying/running a single line into the terminal).
Then:
			brew update
			brew install python
			brew install matplotlib
			brew install wxPython

Then restart the terminal and check that the default version of python is indeed the one installed by homebrew (`which python` should yield `/usr/local/bin/python`, if not, reset the path by adding `export $PATH=/usr/local/bin/:$PATH` to the .bashrc file).
	
Note for users who already have and prefer their python installation in a virtual environment, e.g. the popular Anaconda python stack:  On Mac OSX a virtual python environment as installed by Anaconda (or miniconda) will not be able to run GUI apps due to Apple's security system. To fix this one should allow your system access to a version of python that can access the GUI framework on the Mac, e.g. by pythonw: Using conda: conda install python.app. Then run as 
pythonw Raritas.py 
See also:
http://wiki.wxpython.org/wxPythonVirtualenvOnMac
and
https://docs.python.org/2.7/using/mac.html

* On Linux, as python 2.7 is installed by default one can easily install the 2 modules using pip: (untested!)
			easy_install pip
			pip install matplotlib
			pip install --upgrade --pre -f https://wxpython.org/Phoenix/snapshot-builds/ wxPython

* On Windows:
	Python comes with an installer for windows found here: https://www.python.org/downloads/windows/
	In "System Properties/Advanced", click "Environment variables" and add the installation path of python to the "PATH" system variable.
	Then download get-pip.py (https://bootstrap.pypa.io/get-pip.py) and run it using:
			python get-pip.py
	Then:
			python -m pip install matplotlib
			python -m pip install wxPython
