# Supplementary material for: Raritas: a program for counting high diversity categorical data with highly unequal abundances
Source: PeerJ. 2018 Oct 9;6:e5453. doi: 10.7717/peerj.5453 (PMC6183511; doi:10.7717/peerj.5453)
Supplement: Supplemental Information 1 — Archive (zip format) with detailed user guide, installation tips, example configuration and output files, and detailed definition of currently defined versions of the SOD format. [file peerj-06-5453-s001.zip › Appendix 2 - Sample files/Example configuration file - Antarctic Neogene radiolarians tsv.txt]

Genus	GQ	Species	SQ	Subspecies	Author	HigherTaxon	Comment	onButton	abbreviation
Acanthodesmia		micropora				Nasselaria		n	Aca mic
Acanthosphaera		actinota				Spumellaria		n	Aca act
Acanthosphaera		insignis				Spumellaria		n	Aca ins
Acrosphaera		australis				Collo/Entact/Phaeo		y	australis
Acrosphaera		cyrtodon				Collo/Entact/Phaeo		n	Acr cyr
Acrosphaera		labrata				Collo/Entact/Phaeo		y	labrata
Acrosphaera		lappacea				Collo/Entact/Phaeo		n	Acr lap
Acrosphaera		mercurius				Collo/Entact/Phaeo		n	Acr mer
Acrosphaera		murrayana				Collo/Entact/Phaeo		y	murrayana
Acrosphaera		cuniculiauris				Collo/Entact/Phaeo		y	cuniculi
Acrosphaera		spinosa				Collo/Entact/Phaeo		n	Acr spi
Actinomma		arcadophorum				Spumellaria		n	Act arc
Actinomma		boreale				Spumellaria		n	Act bor
Actinomma		campilacantha				Spumellaria		n	Act cam
Actinomma		delicatulum				Spumellaria		y	Act del
Actinomma		golownini				Spumellaria		y	golownini
Actinomma		spE	cf haysi			Spumellaria		n	Act spE
Actinomma		kerguelensis				Spumellaria		n	Act ker
Actinomma		leptoderma				Spumellaria		y	Act lep
Actinomma		magnifenestra				Spumellaria		n	Act mag
Actinomma		medianum				Spumellaria		n	Act med
Actinomma		medusa				Spumellaria		y	medusa
Actinomma		popofskii				Spumellaria		y	popofskii
Actinomma		livae	?			Spumellaria		n	Act liv
Actinomma	?	nigriniae				Spumellaria		n	Act nig
Actinommid		spC				Spumellaria		n	Act spC
Actinommid		spL				Spumellaria		n	Act spL
Actinommid		spM				Spumellaria		y	Act spM
Actinommid		spN				Spumellaria		n	Act spN
Amphimelissa	?	hibernifortuna				Nasselaria		n	Amp spO
Amphiplecta		acrostoma				Nasselaria		n	Amp acr
Amphiplecta		tripleura				Nasselaria		y	tripleura
Amphirhopalum		ypsilon				Spumellaria		n	Amp yps
Amphitholus		spp				Spumellaria		n	Amp spp
Amphymenium		amphystylium				Spumellaria		y	Amp amp
Amphymenium		challengerae				Spumellaria		n	Amp cha
Anomalocantha		dentata				Spumellaria		y	Ano den
Antarctissa		cylindrica				Nasselaria		y	cylindrica
Antarctissa		deflandrei				Nasselaria		y	deflandrei
Antarctissa		denticulata				Nasselaria		y	denticulata
Antarctissa		robusta				Nasselaria		y	robusta(A)
Antarctissa		ballista				Nasselaria		y	ballista
Antarctissa		strelkovi				Nasselaria		y	strelkovi
Anthocyrtella		callospima				Nasselaria		n	Ant cal
Anthocyrtidium		ehrenbergi				Nasselaria		n	Ant ehr
Anthocyrtidium		spB				Nasselaria		n	Ant spB
Arachnocorallium		calvata				Nasselaria		n	Ara cal
Arachnocorallium		sp17				Nasselaria		n	Ara sp1
Arachnocorallium		sp5				Nasselaria		y	Ara sp5
Arachnocorys		circumtexta				Nasselaria		n	Ara cir
Arachnosphaera		dichotoma				Spumellaria		n	Ara dic
Archipilium		macropus				Nasselaria		n	Arc mac
Archipilium		orthopterum				Nasselaria		n	Arc ort
Archiscenium		quadrispinum				Nasselaria		n	Arc qua
Artobotrys		auriculaleporis				Nasselaria		n	Art aur
Artobotrys		biaurita				Nasselaria		n	Art bia
Artophormis		gracilis				Nasselaria		n	Art gra
Artostrobiid		spB				Nasselaria		n	Art spB
Artostrobus		annulatus				Nasselaria		y	Art ann
Artostrobus		joergenseni				Nasselaria		n	Art joe
Artostrobus		pretabulatus				Nasselaria		n	Art pre
Artostrobus		quadriporus				Nasselaria		n	Art qua
Artostrobus	?	spB				Nasselaria		n	Art spB
Artostrobus	?	semazen				Nasselaria		n	Art sem
Botryometra		poljanskii				Nasselaria		n	Bot pol
Botryopera	?	sp10				Nasselaria		n	Bot sp1
Botryopyle		cribosa				Nasselaria		y	Bot cri
Botryopyle		dionisii				Nasselaria		n	Bot dio
Botryopyle	?	spA				Nasselaria		n	Bot spA
Botryostrobus		aquilonaris				Nasselaria		y	Bot aqu
Botryostrobus		auritus/australis				Nasselaria		y	Bot aur
Botryostrobus		bramlettei				Nasselaria		n	Bot bra
Botryostrobus		joides				Nasselaria		n	Bot joi
Cadium		bullatum				Collo/Entact/Phaeo		n	Cad bul
Callimitra		solocicribrata				Nasselaria		n	Cal sol
Calocyclas		aspera				Nasselaria		n	Cal asp
Calocyclas		semipolita				Nasselaria		n	Cal sem
Cannobotryid	?	spB				Nasselaria		n	Can spB
Cantharospyris		platybursa				Nasselaria		n	Can pla
Carpocanium		pulchrum				Nasselaria		n	Car pul
Carposphaera	?	annikae				Spumellaria		n	Car ann
Carposphaera		subbotinae				Spumellaria		n	Car sub
Cenosphaera		cristata				Spumellaria		y	cristata
Cenosphaera		elysia				Spumellaria		n	Cen ely
Cenosphaera		oceanica				Spumellaria		n	Cen oce
Cenosphaera		reticulata				Spumellaria		n	Cen ret
Cenosphaera	?	spK				Spumellaria		n	Cen spK
Ceratocyrtis		cantharoides				Nasselaria		y	cantharoides
Ceratocyrtis		cucullaris				Nasselaria		y	cuccularis
Ceratocyrtis		galeus				Nasselaria		n	Cer gal
Ceratocyrtis		histricosa				Nasselaria		y	histricosa
Ceratocyrtis		mashae				Nasselaria		y	mashae
Ceratocyrtis		robustus				Nasselaria		n	Cer rob
Ceratocyrtis	?	sp12				Nasselaria		n	Cer sp1
Ceratocyrtis		sp13				Nasselaria		n	Cer sp1
Ceratocyrtis		dolvenianus				Nasselaria		n	Cer dol
Ceratocyrtis	?	spF				Nasselaria		n	Cer spF
Ceratocyrtis	?	spK				Nasselaria		n	Cer spK
Ceratocyrtis		stoermeri				Nasselaria		y	stoermeri
Ceratocyrtis		morawanensis				Nasselaria		y	morawan
Ceratospyris		borealis				Nasselaria		n	Cer bor
Ceratospyris		laventaensis				Nasselaria		n	Cer lav
Challengeron		diodon?				Collo/Entact/Phaeo		n	Cha dio
Challengeron		lingi				Collo/Entact/Phaeo		n	Cha lin
Circodiscus		ellipticus				Spumellaria		y	Circod
Cladococcus		spI				Spumellaria		n	Cla spI
Cladoscenium		ancoratum				Nasselaria		y	Cla anc
Chitascenium		cranites				Nasselaria		n	Cla gro
Cladoscenium		tricolpium				Nasselaria		n	Cla tri
Clathrocanium		coarctatum				Nasselaria		n	Cla coa
Clathrocorys		murrayi				Nasselaria		n	Cla mur
Clathrocorys	?	spJ				Nasselaria		n	Cla spJ
Clathromitra		pentacantha				Nasselaria		n	Cla pen
Clathromitra		pterophormis				Nasselaria		n	Cla pte
Clathromitra	?	spM				Nasselaria		n	Cla spM
Clinorhabdus		anantomus				Nasselaria		n	Cli ana
Collosphaera		huxleyi				Collo/Entact/Phaeo		n	Col hux
Collosphaera		macropora				Collo/Entact/Phaeo		n	Col mac
Collosphaera	?	pyloma				Spumellaria		n	Col pyl
Collosphaerid		reynoldsi				Collo/Entact/Phaeo		n	Col rey
SIphonosphaera		abelmannae				Collo/Entact/Phaeo		n	SIp abe
Collosphaerid		spD				Collo/Entact/Phaeo		n	Col spD
Cornutella		clathrata				Nasselaria		n	Cor cla
Cornutella		profunda				Nasselaria		y	Cor pro
Cornutellid		spA				Nasselaria		n	Cor spA
Corythomelissa		horrida				Nasselaria		n	Cor hor
Corythospyris		fiscella				Nasselaria		y	Cor fis
Corythospyris		jubata				Nasselaria		y	Cor jub
Cubotholus		spp				Spumellaria		n	Cub spp
Cycladophora		antiqua				Nasselaria		n	antiqua
Cycladophora		bicornis				Nasselaria		y	Cyc bic
Cycladophora		campanula				Nasselaria		n	Cyc cam
Cycladophora		conica				Nasselaria		n	Cyc con
Cycladophora		cornutoides				Nasselaria		y	cornutoides
Cycladophora		cosma				Nasselaria		y	Cyc cos
Cycladophora		davisiana				Nasselaria		y	Cyc dav
Cycladophora		golli		golli		Nasselaria		y	C g golli
Cycladophora		golli		regipileus		Nasselaria		y	C g regi
Cycladophora		humerus				Nasselaria		y	Cyc hum
Cycladophora		pliocenica				Nasselaria		y	Cyc pli
Cycladophora		robusta				Nasselaria		n	Cyc rob
Cycladophora		rosetta				Nasselaria		n	Cyc ros
Cycladophora		spA				Nasselaria		n	Cyc spA
Cycladophora		spB				Nasselaria		n	Cyc spB
Cycladophora		spongothorax				Nasselaria		y	Cyc spo
Cyrtocapsella		japonica				Nasselaria		n	Cyr jap
Cyrtocapsella		longithorax				Nasselaria		y	Cyr lon
Cyrtocapsella		robusta				Nasselaria		y	Cyr rob
Cyrtocapsella		tetrapera				Nasselaria		y	Cyr tet
Cyrtolagena		laguncula				Nasselaria		n	Cyr lag
Cystophormis		brevispina				Nasselaria		y	Cys bre
Cystophormis		ob				Nasselaria		y	Cys ob
Cystophormis	?	gargantua				Nasselaria		y	Cys gar
Dendrospyris		haysi				Nasselaria		y	Den hay
Dendrospyris		megalocephalis				Nasselaria		y	Den meg
Dendrospyris		rhodospyroides				Nasselaria		y	Den rho
Dendrospyris	?	sakaii				Nasselaria		y	sakai
Dendrospyris		stabilis				Nasselaria		n	Den sta
Desmospyris	?	spH	cf D.spongiosa			Nasselaria		n	Des spH
Desmospyris		spongiosa				Nasselaria		y	Des spo
Diartus		hughesi				Spumellaria		n	Dia hug
Dictyoceras		melitta				Nasselaria		n	Dic mel
Dictyocoryne		profunda				Spumellaria		n	Dic pro
Dictyocoryne		truncatum				Spumellaria		y	Dic tru
Dictyophimus		archipilium				Nasselaria		n	Dic arc
Dictyophimus		crisiae				Nasselaria		n	Dic cri
Dictyophimus		hirundo				Nasselaria		n	Dic hir
Dictyophimus		infabricatus				Nasselaria		n	Dic inf
Dictyophimus		macropterus				Nasselaria		n	Dic mac
Dictyophimus	?	planctonis				Nasselaria		y	planctonis
Dictyophimus		pocillum	?			Nasselaria		n	Dic poc
Dictyophimus		larus				Nasselaria		n	Dic lar
Dictyophimus	?	kiwi				Nasselaria		n	Dic kiw
Dictyophimus		splendens				Nasselaria		n	Dic spl
Didymocyrtis		laticonus				Spumellaria		n	Did lat
Didymocyrtis		violina				Spumellaria		n	Did vio
Dimelissa		thoracites				Nasselaria		n	Dim tho
Dipylissa		bensoni				Spumellaria		n	Dip ben
Dorcadospyris		alata				Nasselaria		n	Dor ala
Druppatractus		hastatus				Spumellaria		n	Dru has
Druppatractus		irregularis				Spumellaria		y	Dru irr
Drymosphaera	?	pseudosagenoscena				Spumellaria		n	Dry pse
Drymyomma		elegans				Spumellaria		n	Dry ele
Dumetum		rectum				Nasselaria		n	Dum rec
Echinomma		sphaerechinus				Spumellaria		y	Ech sph
Enneaphormis		rotula				Nasselaria		n	Enn rot
Enneaphormis	?	spI				Nasselaria		n	Enn spI
Entactinarian		spA				Collo/Entact/Phaeo		n	Ent spA
Orodapis	?	ferrealuma				Collo/Entact/Phaeo		n	Oro fer
Eucyrtidiid		spH				Nasselaria		n	Euc spH
Eucyrtidium		acuminatum				Nasselaria		n	Euc acu
Eucyrtidium		calvertense				Nasselaria		y	Euc cal
Eucyrtidium		cienkowskii				Nasselaria		y	Euc cie
Eucyrtidium		inflatum				Nasselaria		y	Euc inf
Eucyrtidium		pseudoinflatum				Nasselaria		y	Euc pse
Eucyrtidium		punctatum				Nasselaria		y	Euc pun
Eucyrtidium		teuscheri				Nasselaria		n	Euc teu
Eurystomoskevos		petrushevskaae				Nasselaria		n	Eur pet
Euscenarium		joergenseni				Nasselaria		y	Eus joe
Excentrodiscus		japonicus				Spumellaria		n	Exc jap
Excentrosphaerella		sphaeroconcha				Spumellaria		n	Exc sph
Genetrix		petrushevskayae				Nasselaria		n	Gen pet
Giraffospyris		circumflexa				Nasselaria		n	Gir cir
Gondwanaria		campanulaeformis				Nasselaria		n	Gon cam
Gondwanaria		cylindrica				Nasselaria		y	Gon cyl
Gondwanaria		deflandrei				Nasselaria		y	Gon def
Gondwanaria		hister				Nasselaria		n	Gon his
Gondwanaria		japonica				Nasselaria		y	Gon jap
Gondwanaria		nigriniae				Nasselaria		n	Gon nig
Gondwanaria		reschetnjakae				Nasselaria		n	Gon res
Gondwanaria		clarae				Nasselaria		n	Gon cla
Gonosphaera		primordialis				Collo/Entact/Phaeo		n	Gon pri
Gorgospyris		quinquespine				Nasselaria		n	Gor qui
Haeckeliella		inconstans				Spumellaria		n	Hae inc
Haliometta		miocenica				Spumellaria		n	Hal mio
Haliomma		macrodoras				Spumellaria		n	Hal mac
Heliodiscus		asteriscus				Spumellaria		n	Hel ast
Helisoma		dispar				Spumellaria		n	Hel dis
Helotholus		haysi				Nasselaria		y	Hel hay
Helotholus		praevema				Nasselaria		y	Hel pra
Helotholus		vema				Nasselaria		y	Hel vem
Hexacontium		enthacanthum				Spumellaria		y	Hex ent
Hexacontium		laevigatum				Spumellaria		n	Hex lae
Hexacontium		pachydermum				Spumellaria		y	Hex pac
Hexacontium		spA				Spumellaria		n	Hex spA
Hexalonche		aristarchi				Spumellaria		n	Hex ari
Hexalonche		philosophica				Spumellaria		y	Hex phi
Hexalonche		spB	cf H.esmarki			Spumellaria		y	Hex spB
Hexalonche		spG	aff H.philosophica			Spumellaria		y	Hex spG
Hexalonche	?	spJ				Spumellaria		n	Hex spJ
Hexapyle		dodecantha				Spumellaria		y	Hex dod
Hexastylus		triaxonius				Spumellaria		n	Hex tri
Inversumbrella		sp15				Nasselaria		n	Inv sp1
Joergensenium		appolo				Spumellaria		y	Joe app
Lamprocyclas		aegles				Nasselaria		n	Lam aeg
Lamprocyclas		hannai				Nasselaria		n	Lam han
Lamprocyclas		maritalis				Nasselaria		n	Lam mar
Lamprocyclas	?	spE				Nasselaria		n	Lam spE
Lamprocyrtis		heteroporos				Nasselaria		n	Lam het
Lampromitra		dodecaster				Nasselaria		n	Lam dod
Lampromitra		huxleyi				Nasselaria		n	Lam hux
Lampromitra		quadricuspis				Nasselaria		y	Lam qua
Lampromitra		sp6				Nasselaria		n	Lam sp6
Lampromitra		spE				Nasselaria		n	Lam spE
Lampromitra		spV	cf L.petrushevskayae			Nasselaria		n	Lam spV
Lamprotripus		mawsoni				Nasselaria		n	Lam maw
Larcopyle		augusti				Spumellaria		y	Lar aug
Larcopyle		buetschlii				Spumellaria		y	Lar bue
Larcopyle		eccentricum				Spumellaria		y	Lar ecc
Larcopyle		hayesi				Spumellaria		y	Lar hay
Larcopyle		labyrinthusa				Spumellaria		y	Lar lab
Larcopyle		nebulum				Spumellaria		y	Lar neb
Larcopyle		peregrinator				Spumellaria		n	Lar per
Larcopyle		polyacantha		amplissima		Spumellaria		y	L p amp
Larcopyle		polyacantha		polyacantha		Spumellaria		y	L p pol
Larcopyle		polyacantha		titan		Spumellaria		y	L p tit
Larcopyle		pylomaticus				Spumellaria		y	Lar pyl
Larcopyle		titan				Spumellaria		y	Lar tit
Larcopyle		weddelium				Spumellaria		y	Lar wed
Larcospira		moschkovskii				Spumellaria		y	Lar mos
Larcospira		quadrangula				Spumellaria		n	Lar qua
Liosphaera		antarctica				Spumellaria		n	Lio ant
Lipmanella		dictyoceras				Nasselaria		n	Lip dic
Liriospyris		elevata				Nasselaria		n	Lir ele
Liriospyris		mutuaria				Nasselaria		n	Lir mut
Litharachnium		tentorium				Nasselaria		n	Lit ten
Lithelius		hexaxyphophorus				Spumellaria		n	Lit hex
Lithelius		minor				Spumellaria		n	Lit min
Lithelius		nautiloides				Spumellaria		n	Lit nau
Lithomelissa		brevispicula				Nasselaria		n	Lit bre
Lithomelissa		cheni				Nasselaria		y	cheni
Lithomelissa		ehrenbergi				Nasselaria		n	Lit ehr
Lithomelissa		mitra				Nasselaria		n	Lit mit
Lithomelissa		robusta				Nasselaria		n	Lit rob
Lithomelissa		setosa				Nasselaria		y	Lit set
Lithomelissa		sp11				Nasselaria		n	Lit sp1
Lithomelissa		sp20	aff L.stigi			Nasselaria		n	Lit sp2
Lithomelissa		sphaerocephalis				Nasselaria		n	Lit sph
Lithomelissa	?	spT				Nasselaria		n	Lit spT
Lithomelissa		stigi				Nasselaria		y	stigi
Lithomelissa		tricornis				Nasselaria		n	Lit tri
Lithopera		renzae				Nasselaria		n	Lit ren
Lithostrobus		hexagonalis				Nasselaria		n	Lit hex
Lonchosphaera	?	spH				Spumellaria		n	Lon spH
Lonchosphaera		spicata				Spumellaria		n	Lon spi
Lophocorys		polyacantha				Nasselaria		n	Lop pol
Lophocyrtis		milowi				Nasselaria		n	Lop mil
Lophophaena		capito				Nasselaria		n	Lop cap
Lophophaena		clevei				Nasselaria		n	Lop cle
Lophophaena		macrencephala				Nasselaria		y	Lop mac
Lophophaena		nadezdae				Nasselaria		y	Lop nad
Lophophaena		simplex				Nasselaria		n	Lop sim
Lophophaena		undulatum				Nasselaria		n	Lop und
Lophophaena		leberu				Nasselaria		n	Lop leb
Lophophaena	?	spS				Nasselaria		n	Lop spS
Lophophaena		spU				Nasselaria		n	Lop spU
Lophophaena		thaumasia				Nasselaria		y	thaumasia
Lychnocanium		amphitrite				Nasselaria		n	Lyc amp
Lophospyris		pentagona				Nasselaria		n	Lop pen
Lychnocanium		conica				Nasselaria		y	Lyc con
Lychnocanium		elongata				Nasselaria		n	Lyc elo
Lychnocanium		grande				Nasselaria		y	Lyc gra
Lychnocanium		magnacornuta				Nasselaria		n	Lyc mag
Lychnocanium		spB				Nasselaria		n	Lyc spB
Lychnocanium		spC				Nasselaria		n	Lyc spC
Lychnocanium		sphaerothorax				Nasselaria		n	Lyc sph
Mitrocalpis		aranaefera				Nasselaria		n	Mit ara
Nasselarian		spA				Nasselaria		n	Nas spA
Nasselarian		spB				Nasselaria		n	Nas spB
Nasselarian		spD				Nasselaria		n	Nas spD
Syscioscenium	?	wabisabi				Nasselaria		n	Sys wab
Neosemantis		bjoerklundi		mimicus		Nasselaria		n	Neo bjo
Neosemantis		hofferti				Nasselaria		n	Neo hof
Neosemantis		distephanus				Nasselaria		y	Neo dis
Octopyle		stenozona				Spumellaria		y	Oct ste
Orodapis	?	spB				Collo/Entact/Phaeo		n	Oro spB
Orodapis		hericina				Collo/Entact/Phaeo		y	Oro her
Oroscena		carolae				Collo/Entact/Phaeo		n	Oro car
Pentactinosphaera		hokurikuensis				Spumellaria		n	Pen hok
Pentapylonium		implicatum				Spumellaria		n	Pen imp
Periarachnium		periplectum				Nasselaria		n	Per per
Perichlamydium		praetextum				Spumellaria		y	Per pra
Peridium		longispinum				Nasselaria		y	Per lon
Peridium	?	spL				Nasselaria		n	Per spL
Periphaena		decora				Spumellaria		n	Per dec
Peripyramis		circumtexta				Nasselaria		n	Per cir
Phaeodarian		spA				Collo/Entact/Phaeo		n	Pha spA
Phaeodarian		spB				Collo/Entact/Phaeo		n	Pha spB
Phormacantha		hystrix				Nasselaria		n	Pho hys
Phormospyris		scaphipes				Nasselaria		n	Pho sca
Phormospyris		tricostata				Nasselaria		n	Pho tri
Phormostichoartus		corbula				Nasselaria		n	Pho cor
Phormostichoartus		fistula				Nasselaria		n	Pho fis
Phormostichoartus		furcaspiculata				Nasselaria		n	Pho fur
Phormostichoartus		marylandicus				Nasselaria		n	Pho mar
Phormostichoartus		pitomorphus				Nasselaria		n	Pho pit
Phormostichoartus		spG				Nasselaria		n	Pho spG
Phorticium		clevei				Spumellaria		y	Pho cle
Plagiacantha		panarium				Nasselaria		n	Pla pan
Plagoniid		groupX				Nasselaria		n	Pla gro
Plagoniid		sp14				Nasselaria		n	Pla sp1
Plagoniid		sp19				Nasselaria		n	Pla sp1
Botryopera	?	gibbera				Nasselaria		n	Bot gib
Lithomelissa		vespa				Nasselaria		n	Lit ves
Plagoniid	?	sp23				Nasselaria		n	Pla sp23
Plagoniid		sp2				Nasselaria		n	Pla sp2
Plagoniid		sp3				Nasselaria		n	Pla sp3
Plagoniid		sp4				Nasselaria		y	Pla sp4
Plagoniid		sp7				Nasselaria		n	Pla sp7
Plagoniid		sp8				Nasselaria		n	Pla sp8
Plagoniid		sp25				Nasselaria		n	Pla sp25
Plagoniid	?	spB				Nasselaria		n	Pla spB
Plagoniid	?	spC				Nasselaria		n	Pla spC
Plagoniid		spP				Nasselaria		n	Pla spP
Plagoniid		spQ				Nasselaria		n	Pla spQ
Lophophaena	?	spR				Nasselaria		n	Pla spR
Plagoniid		spW				Nasselaria		n	Pla spW
Plagoniid		spZ				Nasselaria		n	Pla spZ
Plannapus		papillosus				Nasselaria		y	Pla pap
Plannapus		hornibrooki				Nasselaria		y	Pla hor
Plannapus		mauricei				Nasselaria		y	Pla mau
Plannapus		microcephalus				Nasselaria		n	Pla mic
Plannapus	?	uburex				Nasselaria		n	Pla ubu
Plectacantha		cresmatoplegma				Nasselaria		n	Ple cre
Plectacantha		oikiskos				Nasselaria		n	Ple oik
Plectagonidium		deflandrei				Nasselaria		n	Ple def
Plectopyramis		dodecumma				Nasselaria		y	Ple dod
Plegmosphaera		lepticali	?			Spumellaria		n	Ple lep
Porospathis		holostoma				Collo/Entact/Phaeo		n	Por hol
Protocystis		micropelecus				Collo/Entact/Phaeo		n	Pro mic
Protocystis		tritonis				Collo/Entact/Phaeo		n	Pro tri
Protoscenium		simplex				Nasselaria		n	Pro sim
Protoscenium	?	sp18				Nasselaria		n	Pro sp1
Prunoid	?	spD				Spumellaria		y	Pru spD
Prunoid		spG				Spumellaria		n	Pru spG
Pseudocubus		obeliscus				Nasselaria		y	Pse obe
Pseudocubus		warreni				Nasselaria		n	Pse war
Pseudodictyophimus		gracillipes				Nasselaria		y	Pse gra
Pseudodictyophimus		platycephalus				Nasselaria		n	Pse pla
Pseudodictyophimus		spY				Nasselaria		n	Pse spY
Pseudodictyophimus		tanythorax				Nasselaria		y	Pse tan
Pterocanium		charybdeum		trilobum		Nasselaria		n	P c tri
Pterocanium		korotnevi				Nasselaria		n	Pte kor
Pterocanium		praetextum		eucolpium		Nasselaria		n	Pte pra
Pterocanium		praetextum		praetextum		Nasselaria		n	Pte pra
Pterocorys		clausus				Nasselaria		n	Pte cla
Pteroscenium		pinnatum				Nasselaria		n	Pte pin
Rhizoplegma		boreale				Spumellaria		n	Rhi bor
Rhizosphaera		antarctica				Spumellaria		y	Rhi ant
Rhizosphaera		holtedahli				Spumellaria		n	Rhi hol
Rhodospyris	?	spD				Nasselaria		n	Rho spD
Rhodospyris		spN				Nasselaria		n	Rho spN
Saccospyris		antarctica				Nasselaria		y	Sac ant
Saccospyris		conithorax				Nasselaria		y	Sac con
Saccospyris		praeantarctica				Nasselaria		y	Sac pra
Saturnalis		circularis				Spumellaria		n	Sat cir
Schizodiscus		favus				Spumellaria		n	Sch fav
Schizodiscus		spatangus				Spumellaria		n	Sch spa
Sethoconus		tabulatus				Nasselaria		n	Set tab
Sethophormis		aurelia				Nasselaria		n	Set aur
Siphocampe		arachnea				Nasselaria		y	Sip ara
Siphocampe		pachyderma				Nasselaria		n	Sip pac
Siphocampe		quadrata				Nasselaria		n	Sip qua
Siphonosphaera		magnisphaera				Collo/Entact/Phaeo		n	Sip mag
Siphonosphaera		martensi				Collo/Entact/Phaeo		n	Sip mar
Siphonosphaera		vesuvius				Collo/Entact/Phaeo		n	Sip ves
Siphostichoartus		corona				Nasselaria		n	Sip cor
Siphostichoartus		jahnae				Nasselaria		n	Sip jah
Sphaeropyle		antarctica				Spumellaria		n	Sph ant
Sphaeropyle		langii				Spumellaria		n	Sph lan
Sphaeropyle		robusta				Spumellaria		y	Sph rob
Sphaerostylus		rosetta				Spumellaria		n	Sph ros
Sphaerozoum		punctatum				Collo/Entact/Phaeo		n	Sph pun
Spirocyrtis	?	hollisi				Nasselaria		n	Spi hol
Spirocyrtis		subscalaris				Nasselaria		n	Spi sub
Spongaster		cruciferus				Spumellaria		n	Spo cru
Spongaster		tetras				Spumellaria		n	Spo tet
Spongocore		puella				Spumellaria		n	Spo pue
Spongodiscid		groupG				Spumellaria		n	Spo gro
Spongodiscid		spA				Spumellaria		n	Spo spA
Spongodiscid		spH				Spumellaria		n	Spo spH
Spongodiscus		craticulatus				Spumellaria		y	Spo cra
Spongodiscus		osculosus				Spumellaria		y	Spo osc
Spongomelissa		dilli				Nasselaria		n	Spo dil
Spongoplegma	?	spD				Spumellaria		y	Spo spD
Spongoplegma		variabile				Spumellaria		y	Spo var
Spongotrochus		glacialis				Spumellaria		y	Spo gla
Spumellarian		groupA				Spumellaria		n	Spu gro
Spumellarian		spB				Spumellaria		n	Spu spB
Spumellarian		spC				Spumellaria		n	Spu spC
Spumellarian		spD				Spumellaria		n	Spu spD
Stauroxiphos		communis				Spumellaria		y	Sta com
Stichocorys		peregrina				Nasselaria		y	Sti per
Stichocorys		delmontensis				Nasselaria		n	Sti del
Stichophormis		cheni				Nasselaria		n	Sti che
Stichopilium		bicorne				Nasselaria		n	Sti bic
Stichopilium		variabile				Nasselaria		n	Sti var
Streblacantha		circumtexta				Spumellaria		n	Str cir
Stylacontarium		acquilonius				Spumellaria		n	Sty acq
Stylacontarium		bispiculum				Spumellaria		y	Sty bis
Stylatractid		groupA				Spumellaria		n	Sty gro
Stylatractus		neptunus				Spumellaria		y	Sty nep
Stylatractus		santaennae				Spumellaria		y	Sty san
Stylatractus		universus				Spumellaria		y	Sty uni
Stylatractus		spD				Spumellaria		n	Sty spD
Stylochlamydium		venustum				Spumellaria		y	Sty ven
Stylodictya		aculeata				Spumellaria		n	Sty acu
Stylodictya		ocellata				Spumellaria		n	Sty oce
Stylodictya		validispina				Spumellaria		y	Sty val
Stylosphaera		angelina				Spumellaria		y	Sty ang
Stylosphaera		laevis				Spumellaria		n	Sty lae
Stylosphaera		minor				Spumellaria		n	Sty min
Stylosphaera		radiosa				Spumellaria		y	Sty rad
Styptosphaera		spongiacea				Spumellaria		n	Sty spo
Tetraplecta		pinigera				Nasselaria		n	Tet pin
Tetraplecta		sp16				Nasselaria		n	Tet sp1
Tetrapyle		octacantha				Spumellaria		y	Tet oct
Tetraspyris		tetracorethra				Nasselaria		n	Tet tet
Thecosphaera		inermis				Spumellaria		n	The ine
Thecosphaera		japonica				Spumellaria		y	The jap
Thecosphaera		miocenica				Spumellaria		n	The mio
Thecosphaera		pseudojaponica				Spumellaria		n	The pse
Thecosphaera		sanfilippoae				Spumellaria		n	The san
Theocorys		redondoensis				Nasselaria		n	The red
Theocorys		veneris				Nasselaria		n	The ven
Theocorythium		trachelium				Nasselaria		n	The tra
Theocyrtis		diabloensis				Nasselaria		n	The dia
Tholospyris		baconiana				Nasselaria		n	Tho bac
Tholospyris		cortinisca				Nasselaria		n	Tho cor
Tholospyris		gephyristes				Nasselaria		n	Tho gep
Thyrsocyrtis		clausa				Nasselaria		n	Thy cla
Triceraspyris		antarctica				Nasselaria		y	Tri ant
Triceraspyris		coronata				Nasselaria		y	Tri cor
Triceraspyris		spL	cf T.coronata			Nasselaria		y	Tri spL
Triceraspyris	?	spQ				Nasselaria		n	Tri spQ
Triospyrid		groupJ				Nasselaria		n	Tri gro
Triospyrid		spA				Nasselaria		y	Tri spA
Triospyrid		spC				Nasselaria		n	Tri spC
Triospyrid		spI				Nasselaria		n	Tri spI
Triospyrid		spK				Nasselaria		n	Tri spK
Triospyrid		spM				Nasselaria		y	Tri spM
Triospyrid		spO				Nasselaria		n	Tri spO
Triospyrid		spP				Nasselaria		n	Tri spP
Triospyrid		spS				Nasselaria		y	Tri spS
Dendrospyris	?	jobstae				Nasselaria		n	Den job
Tripophaenoscenium		laimingi				Nasselaria		n	Tri lai
Trisolenia		megalactis				Collo/Entact/Phaeo		n	Tri meg
Trisulcus		nanus				Nasselaria		y	Tri nan
Trisulcus		pinguiculus				Nasselaria		y	Tri pin
Undetermined								y	Undet
Velicucullus		altus				Nasselaria		y	Vel alt
Velicucullus		oddgurneri				Nasselaria		y	Vel odd
Zygocircus	?	spA				Nasselaria		n	Zyg spA
