# Supplementary material for: Raritas: a program for counting high diversity categorical data with highly unequal abundances
Source: PeerJ. 2018 Oct 9;6:e5453. doi: 10.7717/peerj.5453 (PMC6183511; doi:10.7717/peerj.5453)
Supplement: Supplemental Information 1 — Archive (zip format) with detailed user guide, installation tips, example configuration and output files, and detailed definition of currently defined versions of the SOD format. [file peerj-06-5453-s001.zip › Appendix 2 - Sample files/Sample output file - SOD v2.1 file Ocean drilling section.ods]

## Sheet: 539
SOD v. :	2.1	File Type:	O	Fossil Group:	D
Source ID:	539	Source Name:	Metanuts	Source Citation::	Baldauf, J.G., 2013. Data report: diatoms from Sites U1334 and U1338, Expedition 320/321. In Pälike, H., Lyle, M., Nishi, H., Raffi, I., Gamage, K., Klaus, A., and the Expedition 320/321 Scientists, Proc. IODP, 320/321: Tokyo (Integrated Ocean Drilling Program Management International, Inc.).				Site:	U1338	U1338	U1338	U1338	U1338	U1338	U1338
Entered By:	Renaudie	Enter Date:	17-12-2014	Checked By:	Mandy	Check Date:	18-06-2015		Hole:	A	A	B	A	B	B	B
Leg Info:	320/321	Leg Qualifier:							Core:	1H	1H	1H	1H	1H	1H	1H
				File Creation Method:	Reformatted				Section:	1	1	2	2	3	4	4
Occurrence Data Type:	C	Keys:	Some counts given as fractional (not explained in source paper), some cells have only presence (X), mostly where diatom abundance in sample was low						Interval top:	45	120	45	45	45	45	120
Comments:	This file has only first few rows and columns of original full data file. Taxon codes are NSB key values. Source file is table T2 downloaded from IODP Leg Report on web (http://publications.iodp.org/proceedings/320_321/oversize.htm)								Depth(mbsf):
									Abundance:
									Preservation:
Genus:	GQ:	Species:	SQ:	Subspecies:	Author:	Taxon Code:	HigherTaxon:	Taxon Comments:
Actinocyclus		sp.	cf. divisus							7			3	1		1
Actinocyclus		ellipticus				5000043						3.5
Actinocyclus		ellipticus		f. lanceolata		5000047
Actinocyclus		ellipticus	spp.					meaning of this combination not given in source paper								1
Actinocyclus		ellipticus		var. javanica		5000053
Actinocyclus		ellipticus		var. spiralis		5000055
Actinocyclus		ingens				5000065
Actinocyclus		moronensis				5000085
Actinocyclus		octonarius				5000093
Actinocyclus		spp.				5000111							1
Actinoptychus		senarius				5000140					2	1			1
Actinoptychus		senarius		var. 1
Actinoptychus		vulgaris				5000158					3		4
Alveus		marinus				5000165				11	9	8.5	9.5	11.5	51.5	11.5
Annelus		californicus
Araniscus		lewisianus				5000213
Asterolampra		acutiloba				5000224
Asterolampra		spp.				5000250				4	3
Asteromphalus		arachne				5000263					1		1
Asteromphalus		elegans				5000271				9	7	13	8	6	22	7
Asteromphalus		spp.				5000304				19	12	13	13	24	24	19
Azpeitia		africana				5000343				3	1	2	3			11
Azpeitia		neocrenulata				5000361				15	29	9	26	3	28	7
Azpeitia		nodulifera				5000365				104	123	200	127	94	384	140
Azpeitia		nodulifera		f.cyclopus		5000366
Azpeitia		praenodulifera				5000372
Azpeitia		salisburyana				5000374
Azpeitia		tabularis				5000378				1	4	7	10	8	12
Azpeitia		tuberculata				5000382
Azpeitia		vetustissima				5000385
