# Supplementary material for: Raritas: a program for counting high diversity categorical data with highly unequal abundances
Source: PeerJ. 2018 Oct 9;6:e5453. doi: 10.7717/peerj.5453 (PMC6183511; doi:10.7717/peerj.5453)
Supplement: Supplemental Information 1 — Archive (zip format) with detailed user guide, installation tips, example configuration and output files, and detailed definition of currently defined versions of the SOD format. [file peerj-06-5453-s001.zip › Appendix 2 - Sample files/Sample output file - SODv2.1 Land section.ods]

## Sheet: Sheet1
SOD v. :	2.1	File Type:	L	Fossil Group:	R
Source ID:		Source Name:		Source Citation:	Hollis (1997): Cretaceous-Paleocene Radiolaria from Eastern Marlborough, New Zealand. Institute of Geological & Nuclear Sciences Monograph 17. 152 p. Lower Hutt, New Zealand: Institute of Geological & Nuclear Sciences Limited				Formation:	Mead Hill	Mead Hill	Mead Hill
Entered By:	Mirjam Broehl	Entry Date:	2.11.2006	Checked By:	David Lazarus	Check Date:	12.01.2017		Sample Name:	WO-28	WO-31	WO-37
Geographic ID:		Geographic Source:		Geographic Name:	Woodside Creek, New Zealand				Meter Level:	-30	-18	-10
Latitude:	41.83S	Longitude:	174.072E	File Creation Method:	Typed				Age:	MAASTRICHTIAN	MAASTRICHTIAN	MAASTRICHTIAN
Occurence Data Type:	C	Keys:	Meter Level - relative to K/T boundary Lithology - LST = limestone, PRC = porcellanite, CHT = chert, MST = mudstone; colour: 1,m,d = light,medium,dark; gy = grey, yl = yellow, gn = green, bn = brown, pp = purple; pk = pink, cm = cream, wh = white, bk = black; carbonate content: s./m./v.calc = slightly/moderately/very calcareous; other: sil = siliceous, cht nod = chert nodule, lam = laminated, bio…						Zone:	RK9	RK9	RK9
Comments:	Only first few rows of full source included this file. Taxa listed by families, and 'Genus' includes family or higher taxon indet names. Lat-Long from images posted at radiolaria.org								Lithology:	LST l.gn-gy, m.calc, sil	LST l.yl-gy, v calc, sil,lam	LST l.gn-gy, v.calc, sil
									Abundance:	A	A	C
									Preservation:	M	M	M
Genus:	GQ:	Species:	SQ:	Subspecies:	Author:	Taxon Code:	Higher Taxon:	Taxon Comments:
SPUMELLARIA	indet.
Actinomminae	indet.									26	95	20
Amphisphaera		spp.			Haeckel, 1881
Amphisphaera		privus			(Foreman) Hollis, 1991					3	1	+
Amphisphaera		aotea			Hollis, 1991
Amphisphaera		kina			Hollis, 1991
Amphisphaera		goruna			(Sanfilippo & Riedel) Strong et al., 1995
Amphisphaera		macrosphaera			(Nishimura) Hollis, 1997
Amphisphaera		coronata	s.l.		(Ehrenberg)
Cladococcus	?	sp.
Conocaryomma		universa	aff.		(Pessagno) Empson-Morin, 1981						+
Haliomma		robusta			Hollis, 1997			n. sp.
Haliomma		gr. b
Hexadorium		magnificum	cf.		Campbell & Clark, 1944
Lithomespilus		coronatus			Squinabol, 1904					7	8	2
Protoxiphotractus		foremanae			Hollis, 1997			n. sp.		3	3	+
Protoxiphotractus		perplexus			Pessagno, 1973
Prunocarpus		wilsoni			Hollis, 1997			n. sp.		2	+
Stylosphaera		pusilla			Campbell & Clark, 1944					1	3	3
Stylosphaera		woodsides			Hollis, 1997			n. sp.		2		+
Stylosphaera		minor			Campbell & Clark, 1942
Saturnalinae	indet.									4	+
Acanthocircus		ellipticus			(Campbell & Clark) Hollis, 1991						1
Saturnalis		kennetti			Dumitrica, 1985
Peritiviator		labyrinthi	cf.		Pessagno, 1976
Tetrapyle		sp.
