# Supplementary material for: Raritas: a program for counting high diversity categorical data with highly unequal abundances
Source: PeerJ. 2018 Oct 9;6:e5453. doi: 10.7717/peerj.5453 (PMC6183511; doi:10.7717/peerj.5453)
Supplement: Supplemental Information 1 — Archive (zip format) with detailed user guide, installation tips, example configuration and output files, and detailed definition of currently defined versions of the SOD format. [file peerj-06-5453-s001.zip › Appendix 3 - SOD definitions/SOD definitions dbl full.ods]

## Sheet: Sheet1
sod_version	file_type	row	col	required	label_or_data	block	value	data_type	data_constraint	comment
2.1	L	1	1	Y	L	G	SOD-OFF v. :
2.1	L	1	2	Y	D	G	SODOFF Version	text	[2.0b1]	data for SOD-OFF v.
2.1	L	1	3	Y	L	G	File Type:
2.1	L	1	4	Y	D	G	File Type	text	[L]	data for File Type
2.1	L	1	5	Y	L	G	Fossil Group:
2.1	L	1	6	Y	D	G	Fossil Group	text	[F|B|N|R|D|DN|S|P|O]	data for Fossil Group. Defined values are one or two letter codes for categories of microfossils used by deep-sea drilling projects. Currently defined: F planktonic foraminifera, B benthic foraminifera, N calcareous nannofossils, R radiolaria, D diatoms, DN dinoflagellates, S silicoflagellates, P palynomorphs (pollen and spores), O other
2.1	L	2	1	Y	L	G	Source:
2.1	L	2	2	N	D	G	Source ID	text		data for Source ID. Generally an external key from another database - a number or other code uniquely identifying publication or other source of data in table
2.1	L	2	3	Y	L	G	Source Name:
2.1	L	2	4	N	D	G	Source Name	text		data for Source Name. Name of database from which source ID taken.
2.1	L	2	5	Y	L	G	Source Citation:
2.1	L	2	6	Y	D	G	Source Citation	text		data for Source Citation. Text in bibliographic citation format, no specific structure specified. May be string 'unpublished' or similar.
2.1	L	3	1	Y	L	G	Entered By:
2.1	L	3	2	Y	D	G	Entered By Name	text		data for Entered By Name. Person primarily responsible for table creation
2.1	L	3	3	Y	L	G	Entered Date:
2.1	L	3	4	Y	D	G	Enter Date	date		data for Entered Date (DD-MM-YYYY)
2.1	L	3	5	Y	L	G	Checked By:
2.1	L	3	6	N	D	G	Checked By Name	text		data for Checked By Name. Person, if any, who independently checked contents of table.
2.1	L	3	7	Y	L	G	Checked Date:
2.1	L	3	8	N	D	G	Check Date	date		data for Checked Date (DD-MM-YYYY)
2.1	L	4	1	Y	L	G	Geographic ID:
2.1	L	4	2	N	D	G	Geographic ID	text		data for Geographic ID. External key from another database - a number or other code uniquely identifying a geographic location
2.1	L	4	3	Y	L	G	Geographic Source:
2.1	L	4	4	N	D	G	Geographic Source	text		data for Geographic Source. Name of database from which Geographic ID taken (e.g. Getty Names database)
2.1	L	4	5	Y	L	G	Geographic Name:
2.1	L	4	6	Y	D	G	Geographic Name	text		data for Geographic Name. Actual name of location
2.1	L	5	1	Y	L	G	Latitude:
2.1	L	5	2	N	D	G	Latitude	number		data for Latitude (decimal)
2.1	L	5	3	Y	L	G	Longitude:
2.1	L	5	4	N	D	G	Longitude	number		data for Longitude (decimal)
2.1	L	5	5	Y	L	G	File Creation Method:
2.1	L	5	6	N	D	G	File Creation Method	text		data for File Creation Method. Currently Typed; Reformatted (from other digital file); Raritas; NSB (download)
2.1	L	6	1	Y	L	G	OccurrenceData Type:
2.1	L	6	2	Y	D	G	Occurrence Data Type	text		data for Occurrence Data Type. Single letter or short string describing type of primary occurrence value scale. Currently C count, % percent, P presence-absence, S semiquantitative [abundance categories like C for common]
2.1	L	6	3	Y	L	G	Keys:
2.1	L	6	4	N	D	G	Keys	text		data for Keys. Explanation of units in occurrence data scale or other scales (Preservation, Lithology). Can be list of abundance codes and definitions for semiquantitative, etc.
2.1	L	7	1	Y	L	G	Comments:
2.1	L	7	2	N	D	G	Comments	text		data for Comments
2.1	L	10	1	Y	L	N	Genus:
2.1	L	10	1	Y	D	N	Genus	text	as defined in zoologic or botanical codes of nomenclature, as appropriate for taxonomic group field	data for genus. Repeats in increasing row values.
2.1	L	10	2	Y	L	N	GQ:
2.1	L	10	2	N	D	N	GQ	text	as defined in zoologic or botanical codes of nomenclature, as appropriate for taxonomic group field	data for genus qualifier. Optional. For terms such as '?', cf. etc. . Repeats in increasing row values
2.1	L	10	3	Y	L	N	Species:
2.1	L	10	3	Y	D	N	Species	text	as defined in zoologic or botanical codes of nomenclature, as appropriate for taxonomic group field	data for Species. . Repeats in increasing row values
2.1	L	10	4	Y	L	N	SQ
2.1	L	10	4	N	D	N	SQ	text	as defined in zoologic or botanical codes of nomenclature, as appropriate for taxonomic group field	data for species qualifier. Optional. For terms such as '?', cf. etc. . Repeats in increasing row values
2.1	L	10	5	Y	L	N	Subspecies:
2.1	L	10	5	N	D	N	Subspecies	text	as defined in zoologic or botanical codes of nomenclature, as appropriate for taxonomic group field	data for subspecies. Optional. Usage and name of this rank varies, e.g. variety in botanic names, etc. . Repeats in increasing row values
2.1	L	10	6	Y	L	N	Author:
2.1	L	10	6	N	D	N	Author	text	as defined in zoologic or botanical codes of nomenclature, as appropriate for taxonomic group field	data for Author. Optional. Primarily for taxa names not documented elsewhere in work flow. . Repeats in increasing row values
2.1	L	10	7	Y	L	N	Taxon Code:
2.1	L	10	7	N	D	N	Taxon Code	text		data for taxon code. Key value from, or for a database. . Repeats in increasing row values
2.1	L	10	8	Y	L	N	Higher Taxon:
2.1	L	10	8	N	D	N	Higher Taxon	text	as defined in zoologic or botanical codes of nomenclature, as appropriate for taxonomic group field	data for higher taxon. Optional. Meant for taxa ranks in-between that of group field and names in row field. . Repeats in increasing row values
2.1	L	10	9	Y	L	N	Taxon Comments:
2.1	L	10	9	N	D	N	Taxon Comment	text		data for taxon comments. Can contain comments about the taxon name, or metadata about the occurrence values for this taxon, e.g. counted vs estimated counts for data collected using Raritas or similar program with rare count mode. Repeats in increasing row values
2.1	L	11	11	Y	D	O	Occurrence Data	text		data for occurrences. conforms to constraints given by occurrence type and occurrence key fields. Repeats in increasing row and column values
2.1	L	2	10	Y	L	S	Formation:
2.1	L	2	11	Y	D	S	Formation	text		data for Formation. Name of lithologic unit. Repeats with increasing column values.
2.1	L	3	10	Y	L	S	Sample Name:
2.1	L	3	11	Y	D	S	Sample Name	text		data for Sample Name. Unique identifier, should indicate section name if not given by field Formation. Repeats with increasing column values.
2.1	L	4	10	Y	L	S	Meter Level:
2.1	L	4	11	N	D	S	Meter Level	number		data for Meter Level. Optional. Repeats with increasing column values.
2.1	L	5	10	Y	L	S	Age:
2.1	L	5	11	N	D	S	Age	text		data for geologic Age, either in regional or global chronostratigraphic terms, or as numeric value. Repeats with increasing column values.
2.1	L	6	10	Y	L	S	Zone:
2.1	L	6	11	N	D	S	Zone	text		data for Zone. Optional. Biostratigraphic zonal assignment. Repeats with increasing column values.
2.1	L	7	10	Y	L	S	Lithology:
2.1	L	7	11	N	D	S	Lithology	text		data for Lithology. Term(s) describing sediment/rock characteristics. Repeats with increasing column values.
2.1	L	8	10	Y	L	S	Abundance:
2.1	L	8	11	N	D	S	Abundance	text		data for Abundance. The overall abundance of the fossil group in the sample. Semiquantitative letter code or (particularly for percent data) count value. Repeats with increasing column values.
2.1	L	9	10	Y	L	S	Preservation:
2.1	L	9	11	N	D	S	Preservation	text		data for Preservation. The average preservation quality for the fossil group in the sample. Repeats with increasing column values.
2.1	O	1	1	Y	L	G	SOD-OFF v. :
2.1	O	1	2	Y	D	G	SODOFF Version	text	must match value in SOD-OFF definition table	data for SOD-OFF v.
2.1	O	1	3	Y	L	G	File Type:
2.1	O	1	4	Y	D	G	File Type	text	[O]	data for File Type
2.1	O	1	5	Y	L	G	Fossil Group:
2.1	O	1	6	Y	D	G	Fossil Group	text	[F|B|N|R|D|DN|S|P|O]	data for Fossil Group. Defined values are one or two letter codes for categories of microfossils used by deep-sea drilling projects. Currently defined: F planktonic foraminifera, B benthic foraminifera, N calcareous nannofossils, R radiolaria, D diatoms, DN dinoflagellates, S silicoflagellates, P palynomorphs (pollen and spores), O other
2.1	O	2	1	Y	L	G	Source ID:
2.1	O	2	2	N	D	G	Source ID	text		data for Source ID. Generally an external key from another database - a number or other code uniquely identifying publication or other source of data in table
2.1	O	2	3	Y	L	G	Source Name:
2.1	O	2	4	N	D	G	Source Name	text		data for Source Name. Name of database from which source ID taken.
2.1	O	2	5	Y	L	G	Source Citation:
2.1	O	2	6	Y	D	G	Source Citation	text		data for Source Citation. Text in bibliographic citation format, no specific structure specified. May be string 'unpublished' or similar.
2.1	O	3	1	Y	L	G	Entered By:
2.1	O	3	2	N	D	G	Entered By Name	text		data for Entered By Name. Person primarily responsible for table creation
2.1	O	3	3	N	L	G	Enter Date:
2.1	O	3	4	Y	D	G	Enter Date	date		data for Entered Date (DD-MM-YYYY)
2.1	O	3	5	Y	L	G	Checked By:
2.1	O	3	6	N	D	G	Checked By Name	text		data for Checked By Name. Person, if any, who independently checked contents of table.
2.1	O	3	7	Y	L	G	Check Date:
2.1	O	3	8	N	D	G	Check Date	date		data for Checked Date (DD-MM-YYYY)
2.1	O	4	1	Y	L	G	Leg Info:
2.1	O	4	2	Y	D	G	Leg Info	text		data for Leg Info. Usually an integer.
2.1	O	4	3	Y	L	G	Leg Qualifier:
2.1	O	4	3	N	D	G	Leg Qualifier	text		data for Leg Qualifier. Usually null. Letter or other qualifier used for a small number of deep-sea drilling program legs
2.1	O	5	5	Y	L	G	File Creation Method:
2.1	O	5	6	N	D	G	File Creation Method	text		data for File Creation Method. Currently Typed; Reformatted (from other digital file); Raritas; NSB (download)
2.1	O	6	1	Y	L	G	Occurrence Data Type:
2.1	O	6	2	Y	D	G	Occurrence Data Type	text		data for Occurrence Data Type. Single letter or short string describing type of primary occurrence value scale. Currently C count, % percent, P presence-absence, S semiquantitative [abundance categories like C for common]
2.1	O	6	4	Y	L	G	Keys:
2.1	O	6	4	N	D	G	Keys	text		data for Keys. Explanation of units in occurrence data scale or other scales e.g. Preservation. Can be list of abundance codes and definitions for semiquantitative, etc.
2.1	O	7	1	Y	L	G	Comments:
2.1	O	7	2	N	D	G	Comments	text		data for Comments
2.1	O	10	1	Y	L	N	Genus:
2.1	O	10	2	Y	L	N	GQ:
2.1	O	10	3	Y	L	N	Species:
2.1	O	10	4	Y	L	N	SQ:
2.1	O	10	5	Y	L	N	Subspecies:
2.1	O	10	6	Y	L	N	Author:
2.1	O	10	7	Y	L	N	Taxon Code:
2.1	O	10	8	Y	L	N	Higher Taxon:
2.1	O	10	9	Y	L	N	Taxon Comments:
2.1	O	11	1	Y	D	N	Genus	text	as defined in zoologic or botanical codes of nomenclature, as appropriate for taxonomic group field	data for genus. Repeats with increasing row values.
2.1	O	11	2	N	D	N	GQ	text	as defined in zoologic or botanical codes of nomenclature, as appropriate for taxonomic group field	data for genus qualifier. Optional. For terms such as '?', cf. etc. Repeats with increasing row values.
2.1	O	11	3	Y	D	N	Species	text	as defined in zoologic or botanical codes of nomenclature, as appropriate for taxonomic group field	data for Species. Repeats with increasing row values.
2.1	O	11	4	N	D	N	SQ	text	as defined in zoologic or botanical codes of nomenclature, as appropriate for taxonomic group field	data for species qualifier. Optional. For terms such as '?', cf. etc. Repeats with increasing row values.
2.1	O	11	5	N	D	N	Subspecies	text	as defined in zoologic or botanical codes of nomenclature, as appropriate for taxonomic group field	data for subspecies. Optional. Usage and name of this rank varies, e.g. variety in botanic names, etc. Repeats with increasing row values.
2.1	O	11	6	N	D	N	Author	text	as defined in zoologic or botanical codes of nomenclature, as appropriate for taxonomic group field	data for Author. Optional. Primarily for taxa names not documented elsewhere in work flow. Repeats with increasing row values.
2.1	O	11	7	N	D	N	Taxon Code	text		data for taxon code. Key value from, or for a database. Repeats with increasing row values.
2.1	O	11	8	N	D	N	Higher Taxon	text	as defined in zoologic or botanical codes of nomenclature, as appropriate for taxonomic group field	data for higher taxon. Optional. Meant for taxa ranks in-between that of group field and names in row field. Repeats with increasing row values.
2.1	O	11	9	N	D	N	Taxon Comments	text		data for taxon comments. Can contain comments about the taxon name, or metadata about the occurrence values for this taxon, e.g. counted vs estimated counts for data collected using Raritas or similar program with rare count mode. Repeats with increasing row values.
2.1	O	11	11	Y	D	O	Occurrence Data	text		data for occurrences. conforms to constraints given by occurrence type and occurrence key fields
2.1	O	2	10	Y	L	S	Site:
2.1	O	2	11	Y	D	S	Site	text		data for Site. Usually an integer. Repeats with increasing column values.
2.1	O	3	10	Y	L	S	Hole:
2.1	O	3	11	Y	D	S	Hole	text		data for Hole. Beginning with Hole 625 (the first hole by the ODP phase of drilling) a required field, normally a capital letter from A to ca G. Earlier holes could be a similar letter or unused (represented as an empty string, null value, or placeholder such as '_' in various databases). Repeats with increasing column values.
2.1	O	4	10	Y	L	S	Core:
2.1	O	4	11	Y	D	S	Core	integer		data for Core. In ODP and later, a letter given in addition to number to indicate drilling method used (R, X, H, etc). This not included here. Repeats with increasing column values.
2.1	O	5	10	Y	L	S	Section:
2.1	O	5	11	Y	D	S	Section	text		data for Section. Usually a number between 1 and 7, rarely up to 9; or text 'CC' for core-catcher. Repeats with increasing column values.
2.1	O	6	10	Y	L	S	Interval top:
2.1	O	6	11	N	D	S	Interval top	number		data for Interval Top. Value in cm from top of section, normally between 0 and 150, where sample taken. Interval bottom, in some databases, gives extent of interval sampled but not included here as usually only 1-3 cm in extent. Repeats with increasing column values.
2.1	O	7	10	Y	L	S	Depth (mbsf):
2.1	O	7	11	N	D	S	Depth (mbsf)	number		data for Depth (mbsf). Meters below sea floor is given by the drilling programs, and rules for calculating changed between early DSDP, later DSDP and subsequent drilling programs. Mbsf remains constant for any sample, unlike mcd (meters composite depth), a modeled value given only for some holes and not here. Repeats with increasing column values.
2.1	O	8	10	Y	L	S	Abundance:
2.1	O	8	11	N	D	S	Abundance	text		data for Abundance. Estimate of overall abundance of fossil group in sample. Semiquantitative letter code or (particularly for percent data) count value. Repeats with increasing column values.
2.1	O	9	10	Y	L	S	Preservation:
2.1	O	9	11	N	D	S	Preservation	text		data for Preservation. Estimate of preservation quality of fossil group in sample. Categories differ between investigators. Repeats with increasing column values.

## Sheet: Sheet2
2.1	O	10	1	Y	D	N	Genus
2.1	O	10	2	N	D	N	GQ
2.1	O	10	3	Y	D	N	Species
2.1	O	10	4	N	D	N	SQ
2.1	O	10	5	N	D	N	Subspecies
2.1	O	10	6	N	D	N	Author
2.1	O	10	7	N	D	N	Taxon Code
2.1	O	10	8	N	D	N	Higher Taxon
2.1	O	10	9	N	D	N	Taxon Comment
2.1	O	10	1	Y	L	N	Genus:
2.1	O	10	2	Y	L	N	GQ:
2.1	O	10	3	Y	L	N	Species:
2.1	O	10	4	Y	L	N	SQ:
2.1	O	10	5	Y	L	N	Subspecies:
2.1	O	10	6	Y	L	N	Author:
2.1	O	10	7	Y	L	N	Taxon Code:
2.1	O	10	8	Y	L	N	Higher Taxon:
2.1	O	10	9	Y	L	N	Taxon Comment:
