# Supplementary material for: Raritas: a program for counting high diversity categorical data with highly unequal abundances
Source: PeerJ. 2018 Oct 9;6:e5453. doi: 10.7717/peerj.5453 (PMC6183511; doi:10.7717/peerj.5453)
Supplement: Supplemental Information 1 — Archive (zip format) with detailed user guide, installation tips, example configuration and output files, and detailed definition of currently defined versions of the SOD format. [file peerj-06-5453-s001.zip › Appendix 3 - SOD definitions/SOD readme.txt]

SOD open file format

Definition fields below are for current version of the SOD format as used in Raritas/RaritasVox and NSB database system. Fields are defined (with comments) only for the data field of each label:data pair. Label fields are fixed text, not to be altered by user, and end with a colon (:). As the column, row extent of such fields can be used to determine the block layout of the file independently of the field definition file, data fields therefore should not have text strings ending with a colon. 'Block' refers to the four main tabular regions that make up the file format: G general metadata, S sample name, N taxa names, O occurrence data values. Fields in the general block do not repeat; the fields in the sample and name blocks repeat in column and row direction, respectively; O data (a single field in the definition) repeats in both row and column directions.  Note that as defined, 'Group' in the general block implies all data in the file belongs to a single taxonomic group but this can be set at any level desired, effectively allowing a mixture of taxa from different groups to be represented in a single file.  If this is done it is recommended to populate the name field 'higher taxon' appropriately.
