# Supplementary material for: Raritas: a program for counting high diversity categorical data with highly unequal abundances
Source: PeerJ. 2018 Oct 9;6:e5453. doi: 10.7717/peerj.5453 (PMC6183511; doi:10.7717/peerj.5453)
Supplement: Supplemental Information 1 — Archive (zip format) with detailed user guide, installation tips, example configuration and output files, and detailed definition of currently defined versions of the SOD format. [file peerj-06-5453-s001.zip › Appendix 4 - Count data and script to estimate improvement/aanr.csv]

Sample	Species	N_total	N_normal	N_rare	Estimated
113-689B-1H-1_116	Acrosphaera labrata	1	1	0	no
113-689B-1H-1_116	Acrosphaera mercurius	4	3	1	no
113-689B-1H-1_116	Actinomma delicatulum	4	1	3	no
113-689B-1H-1_116	Actinomma medianum	1	0	1	no
113-689B-1H-1_116	Actinomma popofskii	28	8	20	no
113-689B-1H-1_116	Actinomma nigriniae	1	0	1	no
113-689B-1H-1_116	Antarctissa cylindrica	2319	773	1546	yes
113-689B-1H-1_116	Antarctissa denticulata	1038	346	692	yes
113-689B-1H-1_116	Antarctissa ballista	5	1	4	no
113-689B-1H-1_116	Antarctissa strelkovi	46	30	16	no
113-689B-1H-1_116	Arachnocorallium calvata	3	0	3	no
113-689B-1H-1_116	Arachnocorallium sp17	1	0	1	no
113-689B-1H-1_116	Arachnosphaera dichotoma	1	0	1	no
113-689B-1H-1_116	Archipilium macropus	4	3	1	no
113-689B-1H-1_116	Archiscenium quadrispinum	1	1	0	no
113-689B-1H-1_116	Artostrobus annulatus	49	14	35	no
113-689B-1H-1_116	Artostrobus joergenseni	25	8	17	no
113-689B-1H-1_116	Artostrobus pretabulatus	3	1	2	no
113-689B-1H-1_116	Botryostrobus auritus/australis	78	25	53	no
113-689B-1H-1_116	Cenosphaera cristata	2	1	1	no
113-689B-1H-1_116	Ceratocyrtis histricosa	8	3	5	no
113-689B-1H-1_116	Ceratocyrtis dolvenianus	1	1	0	no
113-689B-1H-1_116	Challengeron lingi	1	0	1	no
113-689B-1H-1_116	Cladoscenium ancoratum	9	1	8	no
113-689B-1H-1_116	Chitascenium cranites	9	7	2	no
113-689B-1H-1_116	Cladoscenium tricolpium	3	1	2	no
113-689B-1H-1_116	Clathrocanium coarctatum	1	0	1	no
113-689B-1H-1_116	Clathromitra pterophormis	2	1	1	no
113-689B-1H-1_116	Cornutella profunda	21	6	15	no
113-689B-1H-1_116	Corythomelissa horrida	2	0	2	no
113-689B-1H-1_116	Cubotholus spp	2	1	1	no
113-689B-1H-1_116	Cycladophora bicornis	21	6	15	no
113-689B-1H-1_116	Cycladophora cornutoides	1	1	0	no
113-689B-1H-1_116	Cycladophora pliocenica	126	47	79	no
113-689B-1H-1_116	Cycladophora robusta	1	0	1	no
113-689B-1H-1_116	Cyrtolagena laguncula	12	2	10	no
113-689B-1H-1_116	Dendrospyris haysi	10	9	1	no
113-689B-1H-1_116	Desmospyris spongiosa	474	158	316	yes
113-689B-1H-1_116	Dictyophimus crisiae	2	2	0	no
113-689B-1H-1_116	Dictyophimus hirundo	21	8	13	no
113-689B-1H-1_116	Dictyophimus planctonis	38	18	20	no
113-689B-1H-1_116	Dipylissa bensoni	4	2	2	no
113-689B-1H-1_116	Druppatractus irregularis	8	3	5	no
113-689B-1H-1_116	Drymyomma elegans	1	0	1	no
113-689B-1H-1_116	Echinomma sphaerechinus	1	0	1	no
113-689B-1H-1_116	Enneaphormis rotula	5	4	1	no
113-689B-1H-1_116	Orodapis ferrealuma	31	14	17	no
113-689B-1H-1_116	Eucyrtidium calvertense	23	8	15	no
113-689B-1H-1_116	Eucyrtidium cienkowskii	7	2	5	no
113-689B-1H-1_116	Eucyrtidium teuscheri	4	0	4	no
113-689B-1H-1_116	Gondwanaria deflandrei	1	0	1	no
113-689B-1H-1_116	Helotholus vema	381	99	282	no
113-689B-1H-1_116	Hexacontium enthacanthum	4	1	3	no
113-689B-1H-1_116	Hexalonche philosophica	34	11	23	no
113-689B-1H-1_116	Hexapyle dodecantha	10	6	4	no
113-689B-1H-1_116	Lampromitra dodecaster	3	2	1	no
113-689B-1H-1_116	Lampromitra sp6	7	2	5	no
113-689B-1H-1_116	Larcopyle buetschlii	1	1	0	no
113-689B-1H-1_116	Larcopyle labyrinthusa	112	57	55	no
113-689B-1H-1_116	Larcopyle polyacantha polyacantha	28	12	16	no
113-689B-1H-1_116	Larcopyle pylomaticus	6	3	3	no
113-689B-1H-1_116	Larcopyle weddelium	129	47	82	no
113-689B-1H-1_116	Larcospira moschkovskii	6	4	2	no
113-689B-1H-1_116	Litharachnium tentorium	2	2	0	no
113-689B-1H-1_116	Lithelius minor	3	1	2	no
113-689B-1H-1_116	Lithomelissa setosa	7	2	5	no
113-689B-1H-1_116	Lithomelissa sp20	2	0	2	no
113-689B-1H-1_116	Lithomelissa spT	1	1	0	no
113-689B-1H-1_116	Lithomelissa tricornis	5	1	4	no
113-689B-1H-1_116	Lonchosphaera spicata	7	2	5	no
113-689B-1H-1_116	Lychnocanium grande	1	0	1	no
113-689B-1H-1_116	Perichlamydium praetextum	15	11	4	no
113-689B-1H-1_116	Peridium longispinum	34	11	23	no
113-689B-1H-1_116	Peripyramis circumtexta	10	3	7	no
113-689B-1H-1_116	Phaeodarian spA	1	1	0	no
113-689B-1H-1_116	Phormostichoartus furcaspiculata	4	1	3	no
113-689B-1H-1_116	Phormostichoartus pitomorphus	1	1	0	no
113-689B-1H-1_116	Phorticium clevei	19	5	14	no
113-689B-1H-1_116	Plagoniid spB	4	2	2	no
113-689B-1H-1_116	Plannapus papillosus	5	0	5	no
113-689B-1H-1_116	Plectacantha oikiskos	1	1	0	no
113-689B-1H-1_116	Plectagonidium deflandrei	1	0	1	no
113-689B-1H-1_116	Porospathis holostoma	1	1	0	no
113-689B-1H-1_116	Protoscenium simplex	3	2	1	no
113-689B-1H-1_116	Prunoid spD	2	1	1	no
113-689B-1H-1_116	Pseudodictyophimus gracillipes	71	24	47	no
113-689B-1H-1_116	Pseudodictyophimus platycephalus	6	2	4	no
113-689B-1H-1_116	Pseudodictyophimus spY	2	0	2	no
113-689B-1H-1_116	Pseudodictyophimus tanythorax	11	4	7	no
113-689B-1H-1_116	Rhizosphaera antarctica	10	2	8	no
113-689B-1H-1_116	Saccospyris antarctica	31	19	12	no
113-689B-1H-1_116	Saccospyris conithorax	16	8	8	no
113-689B-1H-1_116	Saccospyris praeantarctica	648	216	432	yes
113-689B-1H-1_116	Saturnalis circularis	19	7	12	no
113-689B-1H-1_116	Siphocampe arachnea	53	24	29	no
113-689B-1H-1_116	Sphaeropyle robusta	17	3	14	no
113-689B-1H-1_116	Sphaerozoum punctatum	1	0	1	no
113-689B-1H-1_116	Spongodiscid spH	1	1	0	no
113-689B-1H-1_116	Spongodiscus craticulatus	78	29	49	no
113-689B-1H-1_116	Spongodiscus osculosus	345	115	230	yes
113-689B-1H-1_116	Spongoplegma variabile	20	3	17	no
113-689B-1H-1_116	Spongotrochus glacialis	77	31	46	no
113-689B-1H-1_116	Stichopilium bicorne	2	0	2	no
113-689B-1H-1_116	Stylatractus neptunus	2	1	1	no
113-689B-1H-1_116	Stylatractus universus	7	6	1	no
113-689B-1H-1_116	Stylochlamydium venustum	6	0	6	no
113-689B-1H-1_116	Stylodictya validispina	50	13	37	no
113-689B-1H-1_116	Stylosphaera angelina	3	1	2	no
113-689B-1H-1_116	Tetraplecta pinigera	1	0	1	no
113-689B-1H-1_116	Tetraplecta sp16	5	1	4	no
113-689B-1H-1_116	Tetrapyle octacantha	25	8	17	no
113-689B-1H-1_116	Thecosphaera japonica	14	4	10	no
113-689B-1H-1_116	Tholospyris gephyristes	3	1	2	no
113-689B-1H-1_116	Dendrospyris jobstae	24	9	15	no
113-689B-1H-1_116	Tripophaenoscenium laimingi	2	1	1	no
113-689B-1H-1_116	Trisulcus nanus	17	5	12	no
113-689B-1H-1_116	Undetermined	11	3	8	no
113-689B-1H-1_116	Velicucullus altus	30	10	20	no
113-689B-1H-1_116	Velicucullus oddgurneri	7	5	2	no
113-689B-1H-1_28	Acanthodesmia micropora	1	1	0	no
113-689B-1H-1_28	Acrosphaera mercurius	3	0	3	no
113-689B-1H-1_28	Actinomma boreale	1	1	0	no
113-689B-1H-1_28	Actinomma leptoderma	2	0	2	no
113-689B-1H-1_28	Actinomma popofskii	6	2	4	no
113-689B-1H-1_28	Actinomma nigriniae	6	2	4	no
113-689B-1H-1_28	Actinommid spC	2	1	1	no
113-689B-1H-1_28	Actinommid spP	1	0	1	no
113-689B-1H-1_28	Antarctissa cylindrica	3184	796	2388	yes
113-689B-1H-1_28	Antarctissa denticulata	1088	272	816	yes
113-689B-1H-1_28	Antarctissa strelkovi	27	15	12	no
113-689B-1H-1_28	Arachnosphaera dichotoma	1	0	1	no
113-689B-1H-1_28	Archipilium macropus	3	1	2	no
113-689B-1H-1_28	Botryostrobus auritus/australis	19	4	15	no
113-689B-1H-1_28	Botryostrobus bramlettei	2	1	1	no
113-689B-1H-1_28	Carposphaera annikae	2	2	0	no
113-689B-1H-1_28	Cenosphaera cristata	8	5	3	no
113-689B-1H-1_28	Ceratocyrtis histricosa	1	1	0	no
113-689B-1H-1_28	Ceratocyrtis mashae	2	0	2	no
113-689B-1H-1_28	Ceratocyrtis dolvenianus	1	0	1	no
113-689B-1H-1_28	Clathromitra pterophormis	1	0	1	no
113-689B-1H-1_28	Collosphaerid reynoldsi	3	2	1	no
113-689B-1H-1_28	Cornutella profunda	2	1	1	no
113-689B-1H-1_28	Corythomelissa horrida	5	1	4	no
113-689B-1H-1_28	Cycladophora bicornis	11	3	8	no
113-689B-1H-1_28	Cycladophora cornutoides	2	1	1	no
113-689B-1H-1_28	Cycladophora pliocenica	208	52	156	yes
113-689B-1H-1_28	Cyrtolagena laguncula	1	0	1	no
113-689B-1H-1_28	Dendrospyris haysi	18	13	5	no
113-689B-1H-1_28	Desmospyris spongiosa	556	139	417	yes
113-689B-1H-1_28	Dictyophimus hirundo	38	6	32	no
113-689B-1H-1_28	Dictyophimus planctonis	44	9	35	no
113-689B-1H-1_28	Dipylissa bensoni	2	2	0	no
113-689B-1H-1_28	Druppatractus hastatus	1	0	1	no
113-689B-1H-1_28	Druppatractus irregularis	1	1	0	no
113-689B-1H-1_28	Echinomma sphaerechinus	4	0	4	no
113-689B-1H-1_28	Enneaphormis rotula	2	1	1	no
113-689B-1H-1_28	Orodapis ferrealuma	29	9	20	no
113-689B-1H-1_28	Eucyrtidium calvertense	53	18	35	no
113-689B-1H-1_28	Eucyrtidium cienkowskii	1	0	1	no
113-689B-1H-1_28	Eucyrtidium teuscheri	2	1	1	no
113-689B-1H-1_28	Gondwanaria reschetnjakae	4	0	4	no
113-689B-1H-1_28	Haliometta miocenica	1	0	1	no
113-689B-1H-1_28	Helisoma dispar	2	0	2	no
113-689B-1H-1_28	Helotholus vema	368	92	276	yes
113-689B-1H-1_28	Hexacontium pachydermum	3	0	3	no
113-689B-1H-1_28	Hexalonche philosophica	53	19	34	no
113-689B-1H-1_28	Hexapyle dodecantha	7	5	2	no
113-689B-1H-1_28	Joergensenium appolo	1	1	0	no
113-689B-1H-1_28	Lampromitra sp6	2	1	1	no
113-689B-1H-1_28	Lamprotripus mawsoni	1	0	1	no
113-689B-1H-1_28	Larcopyle buetschlii	3	2	1	no
113-689B-1H-1_28	Larcopyle hayesi	1	1	0	no
113-689B-1H-1_28	Larcopyle labyrinthusa	12	2	10	no
113-689B-1H-1_28	Larcopyle polyacantha amplissima	3	2	1	no
113-689B-1H-1_28	Larcopyle pylomaticus	3	1	2	no
113-689B-1H-1_28	Larcopyle weddelium	138	39	99	no
113-689B-1H-1_28	Larcospira moschkovskii	33	5	28	no
113-689B-1H-1_28	Lipmanella dictyoceras	1	1	0	no
113-689B-1H-1_28	Lithelius minor	1	0	1	no
113-689B-1H-1_28	Lithelius nautiloides	3	1	2	no
113-689B-1H-1_28	Lithomelissa sp20	1	1	0	no
113-689B-1H-1_28	Lithomelissa tricornis	1	1	0	no
113-689B-1H-1_28	Lonchosphaera spH	1	1	0	no
113-689B-1H-1_28	Lonchosphaera spicata	2	0	2	no
113-689B-1H-1_28	Lophophaena witjazii	1	0	1	no
113-689B-1H-1_28	Syscioscenium wabisabi	1	0	1	no
113-689B-1H-1_28	Octopyle stenozona	1	0	1	no
113-689B-1H-1_28	Pentapylonium implicatum	1	0	1	no
113-689B-1H-1_28	Perichlamydium praetextum	14	3	11	no
113-689B-1H-1_28	Peripyramis circumtexta	4	1	3	no
113-689B-1H-1_28	Phorticium clevei	42	15	27	no
113-689B-1H-1_28	Plagoniid spB	4	2	2	no
113-689B-1H-1_28	Prunoid spD	7	4	3	no
113-689B-1H-1_28	Pseudodictyophimus gracillipes	29	7	22	no
113-689B-1H-1_28	Pseudodictyophimus platycephalus	2	1	1	no
113-689B-1H-1_28	Pseudodictyophimus spY	1	1	0	no
113-689B-1H-1_28	Pterocanium charybdeum trilobum	1	1	0	no
113-689B-1H-1_28	Rhizosphaera antarctica	3	0	3	no
113-689B-1H-1_28	Saccospyris antarctica	7	1	6	no
113-689B-1H-1_28	Saccospyris praeantarctica	524	131	393	yes
113-689B-1H-1_28	Saturnalis circularis	11	1	10	no
113-689B-1H-1_28	Sethoconus tabulatus	1	1	0	no
113-689B-1H-1_28	Sphaeropyle robusta	13	1	12	no
113-689B-1H-1_28	Spongodiscus craticulatus	32	31	1	no
113-689B-1H-1_28	Spongodiscus osculosus	308	77	231	yes
113-689B-1H-1_28	Spongotrochus glacialis	52	11	41	no
113-689B-1H-1_28	Stauroxiphos communis	2	1	1	no
113-689B-1H-1_28	Stylatractus neptunus	4	1	3	no
113-689B-1H-1_28	Stylatractus universus	7	1	6	no
113-689B-1H-1_28	Stylochlamydium venustum	2	1	1	no
113-689B-1H-1_28	Stylodictya validispina	18	4	14	no
113-689B-1H-1_28	Stylosphaera angelina	4	1	3	no
113-689B-1H-1_28	Tetraplecta pinigera	1	0	1	no
113-689B-1H-1_28	Tetraplecta sp16	7	2	5	no
113-689B-1H-1_28	Tetrapyle octacantha	5	2	3	no
113-689B-1H-1_28	Thecosphaera japonica	26	12	14	no
113-689B-1H-1_28	Thecosphaera pseudojaponica	2	1	1	no
113-689B-1H-1_28	Triceraspyris antarctica	1	0	1	no
113-689B-1H-1_28	Tripophaenoscenium laimingi	1	1	0	no
113-689B-1H-1_28	Trisulcus nanus	13	3	10	no
113-689B-1H-1_28	Undetermined	5	2	3	no
113-689B-1H-1_28	Velicucullus altus	27	10	17	no
113-689B-1H-1_28	Velicucullus oddgurneri	4	3	1	no
113-689B-1H-3	Acrosphaera mercurius	8	3	5	no
113-689B-1H-3	Actinomma popofskii	1	0	1	no
113-689B-1H-3	Actinommid spC	1	0	1	no
113-689B-1H-3	Amphiplecta acrostoma	3	0	3	no
113-689B-1H-3	Antarctissa cylindrica	2627	750	1877	yes
113-689B-1H-3	Antarctissa denticulata	970	277	693	yes
113-689B-1H-3	Antarctissa ballista	2	2	0	no
113-689B-1H-3	Antarctissa strelkovi	116	45	71	no
113-689B-1H-3	Arachnocorallium sp5	2	2	0	no
113-689B-1H-3	Arachnosphaera dichotoma	1	0	1	no
113-689B-1H-3	Archipilium macropus	7	5	2	no
113-689B-1H-3	Artostrobus annulatus	201	52	149	no
113-689B-1H-3	Artostrobus joergenseni	7	2	5	no
113-689B-1H-3	Botryostrobus auritus/australis	114	28	86	no
113-689B-1H-3	Cadium bullatum	1	0	1	no
113-689B-1H-3	Cenosphaera cristata	2	0	2	no
113-689B-1H-3	Ceratocyrtis histricosa	1	1	0	no
113-689B-1H-3	Ceratocyrtis mashae	1	1	0	no
113-689B-1H-3	Ceratocyrtis dolvenianus	1	0	1	no
113-689B-1H-3	Cladoscenium ancoratum	7	5	2	no
113-689B-1H-3	Chitascenium cranites	1	1	0	no
113-689B-1H-3	Cladoscenium tricolpium	4	2	2	no
113-689B-1H-3	Clathrocorys spJ	1	0	1	no
113-689B-1H-3	Clathromitra pterophormis	4	1	3	no
113-689B-1H-3	Cornutella profunda	40	12	28	no
113-689B-1H-3	Corythomelissa horrida	5	2	3	no
113-689B-1H-3	Cycladophora bicornis	33	15	18	no
113-689B-1H-3	Cycladophora cornutoides	2	0	2	no
113-689B-1H-3	Cycladophora pliocenica	102	37	65	no
113-689B-1H-3	Cycladophora robusta	1	1	0	no
113-689B-1H-3	Cyrtocapsella robusta	1	0	1	no
113-689B-1H-3	Cyrtolagena laguncula	17	6	11	no
113-689B-1H-3	Dendrospyris haysi	127	49	78	no
113-689B-1H-3	Dendrospyris megalocephalis	1	0	1	no
113-689B-1H-3	Desmospyris spongiosa	233	61	172	no
113-689B-1H-3	Dictyophimus hirundo	34	10	24	no
113-689B-1H-3	Dictyophimus macropterus	4	3	1	no
113-689B-1H-3	Dictyophimus planctonis	19	8	11	no
113-689B-1H-3	Druppatractus irregularis	11	4	7	no
113-689B-1H-3	Echinomma sphaerechinus	7	5	2	no
113-689B-1H-3	Enneaphormis rotula	3	3	0	no
113-689B-1H-3	Orodapis ferrealuma	32	12	20	no
113-689B-1H-3	Eucyrtidium calvertense	66	23	43	no
113-689B-1H-3	Eucyrtidium cienkowskii	16	5	11	no
113-689B-1H-3	Eucyrtidium inflatum	2	0	2	no
113-689B-1H-3	Eucyrtidium pseudoinflatum	1	0	1	no
113-689B-1H-3	Eucyrtidium teuscheri	3	1	2	no
113-689B-1H-3	Euscenarium joergenseni	68	24	44	no
113-689B-1H-3	Gondwanaria campanulaeformis	2	1	1	no
113-689B-1H-3	Gondwanaria cylindrica	1	0	1	no
113-689B-1H-3	Gondwanaria deflandrei	4	2	2	no
113-689B-1H-3	Gondwanaria reschetnjakae	1	0	1	no
113-689B-1H-3	Helotholus praevema	448	128	320	yes
113-689B-1H-3	Helotholus vema	234	82	152	no
113-689B-1H-3	Hexacontium pachydermum	7	1	6	no
113-689B-1H-3	Hexalonche philosophica	96	25	71	no
113-689B-1H-3	Hexapyle dodecantha	14	7	7	no
113-689B-1H-3	Joergensenium appolo	6	2	4	no
113-689B-1H-3	Lampromitra dodecaster	5	2	3	no
113-689B-1H-3	Larcopyle buetschlii	15	3	12	no
113-689B-1H-3	Larcopyle hayesi	2	1	1	no
113-689B-1H-3	Larcopyle labyrinthusa	48	25	23	no
113-689B-1H-3	Larcopyle polyacantha polyacantha	59	19	40	no
113-689B-1H-3	Larcopyle pylomaticus	29	11	18	no
113-689B-1H-3	Larcopyle titan	24	7	17	no
113-689B-1H-3	Larcopyle weddelium	181	83	98	no
113-689B-1H-3	Larcospira moschkovskii	1	0	1	no
113-689B-1H-3	Lipmanella dictyoceras	1	0	1	no
113-689B-1H-3	Litharachnium tentorium	26	4	22	no
113-689B-1H-3	Lithelius nautiloides	14	6	8	no
113-689B-1H-3	Lithomelissa sp11	13	5	8	no
113-689B-1H-3	Lithomelissa sp20	3	1	2	no
113-689B-1H-3	Lithomelissa tricornis	17	10	7	no
113-689B-1H-3	Lonchosphaera spH	1	0	1	no
113-689B-1H-3	Lonchosphaera spicata	13	3	10	no
113-689B-1H-3	Lophophaena clevei	3	1	2	no
113-689B-1H-3	Lophospyris pentagona	1	0	1	no
113-689B-1H-3	Lychnocanium grande	1	0	1	no
113-689B-1H-3	Oroscena carolae	1	1	0	no
113-689B-1H-3	Pentapylonium implicatum	1	1	0	no
113-689B-1H-3	Perichlamydium praetextum	10	3	7	no
113-689B-1H-3	Peridium longispinum	19	9	10	no
113-689B-1H-3	Peripyramis circumtexta	3	1	2	no
113-689B-1H-3	Phaeodarian spA	1	0	1	no
113-689B-1H-3	Phorticium clevei	59	24	35	no
113-689B-1H-3	Plagoniid spB	15	2	13	no
113-689B-1H-3	Plagoniid spC	1	1	0	no
113-689B-1H-3	Plagoniid spW	1	0	1	no
113-689B-1H-3	Plectacantha oikiskos	4	2	2	no
113-689B-1H-3	Plectopyramis dodecumma	2	1	1	no
113-689B-1H-3	Protoscenium simplex	2	1	1	no
113-689B-1H-3	Prunoid spD	5	0	5	no
113-689B-1H-3	Pseudocubus obeliscus	1	1	0	no
113-689B-1H-3	Pseudodictyophimus gracillipes	38	18	20	no
113-689B-1H-3	Pseudodictyophimus platycephalus	2	0	2	no
113-689B-1H-3	Pseudodictyophimus tanythorax	5	1	4	no
113-689B-1H-3	Rhizosphaera antarctica	1	0	1	no
113-689B-1H-3	Saccospyris antarctica	103	39	64	no
113-689B-1H-3	Saccospyris praeantarctica	137	57	80	no
113-689B-1H-3	Siphocampe arachnea	48	20	28	no
113-689B-1H-3	Sphaeropyle antarctica	1	0	1	no
113-689B-1H-3	Sphaeropyle robusta	29	8	21	no
113-689B-1H-3	Spongodiscid spH	17	4	13	no
113-689B-1H-3	Spongodiscus craticulatus	197	70	127	no
113-689B-1H-3	Spongodiscus osculosus	76	22	54	no
113-689B-1H-3	Spongoplegma spD	1	0	1	no
113-689B-1H-3	Spongoplegma variabile	9	7	2	no
113-689B-1H-3	Spongotrochus glacialis	4	3	1	no
113-689B-1H-3	Stauroxiphos communis	9	4	5	no
113-689B-1H-3	Stylatractus neptunus	6	0	6	no
113-689B-1H-3	Stylatractus santaennae	1	1	0	no
113-689B-1H-3	Stylochlamydium venustum	24	9	15	no
113-689B-1H-3	Stylodictya aculeata	1	1	0	no
113-689B-1H-3	Stylodictya validispina	53	15	38	no
113-689B-1H-3	Stylosphaera angelina	2	2	0	no
113-689B-1H-3	Tetraplecta sp16	4	1	3	no
113-689B-1H-3	Tetrapyle octacantha	19	6	13	no
113-689B-1H-3	Thecosphaera japonica	29	8	21	no
113-689B-1H-3	Thecosphaera pseudojaponica	3	1	2	no
113-689B-1H-3	Tholospyris gephyristes	5	2	3	no
113-689B-1H-3	Trisulcus nanus	24	9	15	no
113-689B-1H-3	Undetermined	6	1	5	no
113-689B-1H-3	Velicucullus altus	49	13	36	no
113-689B-1H-3	Velicucullus oddgurneri	8	3	5	no
113-689B-2H-1	Acanthodesmia micropora	1	0	1	no
113-689B-2H-1	Acrosphaera australis	2	0	2	no
113-689B-2H-1	Acrosphaera labrata	1	0	1	no
113-689B-2H-1	Acrosphaera mercurius	6	1	5	no
113-689B-2H-1	Actinomma delicatulum	2	1	1	no
113-689B-2H-1	Actinomma medianum	2	1	1	no
113-689B-2H-1	Actinomma popofskii	19	10	9	no
113-689B-2H-1	Antarctissa cylindrica	1543	514	1029	yes
113-689B-2H-1	Antarctissa deflandrei	1	1	0	no
113-689B-2H-1	Antarctissa denticulata	714	238	476	yes
113-689B-2H-1	Antarctissa robusta	22	22	0	no
113-689B-2H-1	Antarctissa ballista	7	4	3	no
113-689B-2H-1	Antarctissa strelkovi	49	24	25	no
113-689B-2H-1	Arachnocorallium calvata	3	2	1	no
113-689B-2H-1	Arachnocorallium sp17	3	1	2	no
113-689B-2H-1	Archipilium macropus	2	0	2	no
113-689B-2H-1	Artostrobus annulatus	101	24	77	no
113-689B-2H-1	Artostrobus joergenseni	13	13	0	no
113-689B-2H-1	Artostrobus pretabulatus	1	0	1	no
113-689B-2H-1	Botryostrobus auritus/australis	27	9	18	no
113-689B-2H-1	Cenosphaera cristata	7	1	6	no
113-689B-2H-1	Ceratocyrtis histricosa	2	1	1	no
113-689B-2H-1	Ceratocyrtis mashae	5	1	4	no
113-689B-2H-1	Ceratocyrtis dolvenianus	1	1	0	no
113-689B-2H-1	Cladoscenium ancoratum	3	1	2	no
113-689B-2H-1	Chitascenium cranites	5	3	2	no
113-689B-2H-1	Clathromitra pentacantha	2	1	1	no
113-689B-2H-1	Clathromitra pterophormis	2	0	2	no
113-689B-2H-1	Cornutella profunda	205	69	136	no
113-689B-2H-1	Corythomelissa horrida	7	2	5	no
113-689B-2H-1	Cubotholus spp	3	3	0	no
113-689B-2H-1	Cycladophora bicornis	48	20	28	no
113-689B-2H-1	Cycladophora conica	1	0	1	no
113-689B-2H-1	Cycladophora cornutoides	6	1	5	no
113-689B-2H-1	Cycladophora pliocenica	149	55	94	no
113-689B-2H-1	Cycladophora spongothorax	1	1	0	no
113-689B-2H-1	Cyrtolagena laguncula	2	1	1	no
113-689B-2H-1	Dendrospyris haysi	27	18	9	no
113-689B-2H-1	Desmospyris spongiosa	348	100	248	no
113-689B-2H-1	Dictyocoryne profunda	1	0	1	no
113-689B-2H-1	Dictyophimus crisiae	1	0	1	no
113-689B-2H-1	Dictyophimus hirundo	2	0	2	no
113-689B-2H-1	Dictyophimus macropterus	2	0	2	no
113-689B-2H-1	Dictyophimus planctonis	29	9	20	no
113-689B-2H-1	Druppatractus hastatus	12	5	7	no
113-689B-2H-1	Druppatractus irregularis	2	1	1	no
113-689B-2H-1	Echinomma sphaerechinus	2	1	1	no
113-689B-2H-1	Enneaphormis rotula	5	5	0	no
113-689B-2H-1	Orodapis ferrealuma	32	11	21	no
113-689B-2H-1	Eucyrtidium calvertense	37	20	17	no
113-689B-2H-1	Eucyrtidium cienkowskii	5	2	3	no
113-689B-2H-1	Eucyrtidium pseudoinflatum	1	1	0	no
113-689B-2H-1	Euscenarium joergenseni	3	0	3	no
113-689B-2H-1	Gondwanaria campanulaeformis	1	0	1	no
113-689B-2H-1	Gondwanaria cylindrica	2	1	1	no
113-689B-2H-1	Gondwanaria deflandrei	5	3	2	no
113-689B-2H-1	Haliomma macrodoras	1	0	1	no
113-689B-2H-1	Helotholus praevema	1258	419	839	yes
113-689B-2H-1	Helotholus vema	160	37	123	no
113-689B-2H-1	Hexacontium enthacanthum	1	0	1	no
113-689B-2H-1	Hexacontium pachydermum	11	1	10	no
113-689B-2H-1	Hexalonche philosophica	64	22	42	no
113-689B-2H-1	Hexapyle dodecantha	24	17	7	no
113-689B-2H-1	Lampromitra dodecaster	9	5	4	no
113-689B-2H-1	Larcopyle buetschlii	31	9	22	no
113-689B-2H-1	Larcopyle hayesi	9	6	3	no
113-689B-2H-1	Larcopyle labyrinthusa	83	27	56	no
113-689B-2H-1	Larcopyle polyacantha polyacantha	88	20	68	no
113-689B-2H-1	Larcopyle polyacantha titan	85	25	60	no
113-689B-2H-1	Larcopyle pylomaticus	105	39	66	no
113-689B-2H-1	Larcopyle titan	25	12	13	no
113-689B-2H-1	Larcopyle weddelium	74	31	43	no
113-689B-2H-1	Larcospira moschkovskii	5	3	2	no
113-689B-2H-1	Lipmanella dictyoceras	1	0	1	no
113-689B-2H-1	Litharachnium tentorium	4	2	2	no
113-689B-2H-1	Lithelius nautiloides	3	0	3	no
113-689B-2H-1	Lithomelissa sp11	11	4	7	no
113-689B-2H-1	Lithomelissa sp20	1	1	0	no
113-689B-2H-1	Lithomelissa tricornis	4	3	1	no
113-689B-2H-1	Lithostrobus hexagonalis	1	0	1	no
113-689B-2H-1	Lonchosphaera spicata	3	0	3	no
113-689B-2H-1	Lophophaena clevei	1	0	1	no
113-689B-2H-1	Lychnocanium grande	12	4	8	no
113-689B-2H-1	Pentapylonium implicatum	2	2	0	no
113-689B-2H-1	Perichlamydium praetextum	15	4	11	no
113-689B-2H-1	Peridium longispinum	11	6	5	no
113-689B-2H-1	Peripyramis circumtexta	10	4	6	no
113-689B-2H-1	Phorticium clevei	73	29	44	no
113-689B-2H-1	Plagoniid sp4	206	82	124	no
113-689B-2H-1	Plectopyramis dodecumma	1	1	0	no
113-689B-2H-1	Protocystis micropelecus	1	0	1	no
113-689B-2H-1	Pseudocubus obeliscus	1	1	0	no
113-689B-2H-1	Pseudodictyophimus gracillipes	36	21	15	no
113-689B-2H-1	Pseudodictyophimus platycephalus	5	2	3	no
113-689B-2H-1	Pseudodictyophimus spY	1	1	0	no
113-689B-2H-1	Pseudodictyophimus tanythorax	9	5	4	no
113-689B-2H-1	Pterocanium korotnevi	2	0	2	no
113-689B-2H-1	Rhizosphaera antarctica	2	2	0	no
113-689B-2H-1	Saccospyris antarctica	195	69	126	no
113-689B-2H-1	Saccospyris conithorax	5	1	4	no
113-689B-2H-1	Saccospyris praeantarctica	235	99	136	no
113-689B-2H-1	Sethoconus tabulatus	2	1	1	no
113-689B-2H-1	Siphocampe arachnea	131	53	78	no
113-689B-2H-1	Sphaeropyle antarctica	2	0	2	no
113-689B-2H-1	Sphaeropyle robusta	31	10	21	no
113-689B-2H-1	Sphaerozoum punctatum	2	0	2	no
113-689B-2H-1	Spongodiscid spH	3	2	1	no
113-689B-2H-1	Spongodiscus craticulatus	288	101	187	no
113-689B-2H-1	Spongodiscus osculosus	119	31	88	no
113-689B-2H-1	Spongoplegma variabile	29	10	19	no
113-689B-2H-1	Spongotrochus glacialis	36	16	20	no
113-689B-2H-1	Stauroxiphos communis	4	3	1	no
113-689B-2H-1	Stichopilium bicorne	1	1	0	no
113-689B-2H-1	Stylatractus neptunus	2	0	2	no
113-689B-2H-1	Stylatractus santaennae	1	0	1	no
113-689B-2H-1	Stylatractus universus	51	18	33	no
113-689B-2H-1	Stylochlamydium venustum	24	10	14	no
113-689B-2H-1	Stylodictya aculeata	6	2	4	no
113-689B-2H-1	Stylodictya validispina	43	11	32	no
113-689B-2H-1	Tetrapyle octacantha	70	39	31	no
113-689B-2H-1	Thecosphaera japonica	30	10	20	no
113-689B-2H-1	Tholospyris gephyristes	1	0	1	no
113-689B-2H-1	Dendrospyris jobstae	5	0	5	no
113-689B-2H-1	Trisulcus nanus	70	31	39	no
113-689B-2H-1	Undetermined	5	1	4	no
113-689B-2H-1	Velicucullus altus	58	16	42	no
113-689B-2H-1	Velicucullus oddgurneri	3	1	2	no
113-689B-2H-2	Acanthodesmia micropora	1	0	1	no
113-689B-2H-2	Acrosphaera mercurius	10	7	3	no
113-689B-2H-2	Actinomma leptoderma	2	1	1	no
113-689B-2H-2	Actinomma popofskii	6	1	5	no
113-689B-2H-2	Antarctissa cylindrica	2273	909	1364	yes
113-689B-2H-2	Antarctissa denticulata	603	241	362	yes
113-689B-2H-2	Antarctissa robusta	15	10	5	no
113-689B-2H-2	Antarctissa ballista	7	4	3	no
113-689B-2H-2	Antarctissa strelkovi	500	200	300	yes
113-689B-2H-2	Arachnocorallium sp5	1	1	0	no
113-689B-2H-2	Artostrobus annulatus	102	56	46	no
113-689B-2H-2	Artostrobus joergenseni	8	4	4	no
113-689B-2H-2	Botryostrobus auritus/australis	37	18	19	no
113-689B-2H-2	Cadium bullatum	1	0	1	no
113-689B-2H-2	Cenosphaera cristata	6	1	5	no
113-689B-2H-2	Ceratocyrtis cantharoides	2	0	2	no
113-689B-2H-2	Ceratocyrtis histricosa	2	0	2	no
113-689B-2H-2	Cladoscenium ancoratum	3	1	2	no
113-689B-2H-2	Chitascenium cranites	2	1	1	no
113-689B-2H-2	Cladoscenium tricolpium	1	1	0	no
113-689B-2H-2	Clathromitra pentacantha	1	1	0	no
113-689B-2H-2	Clathromitra pterophormis	7	2	5	no
113-689B-2H-2	Cornutella profunda	74	33	41	no
113-689B-2H-2	Corythomelissa horrida	1	0	1	no
113-689B-2H-2	Cubotholus spp	1	1	0	no
113-689B-2H-2	Cycladophora bicornis	18	10	8	no
113-689B-2H-2	Cycladophora conica	1	0	1	no
113-689B-2H-2	Cycladophora pliocenica	60	27	33	no
113-689B-2H-2	Cyrtolagena laguncula	1	1	0	no
113-689B-2H-2	Dendrospyris haysi	154	88	66	no
113-689B-2H-2	Dendrospyris megalocephalis	1	1	0	no
113-689B-2H-2	Desmospyris spongiosa	75	27	48	no
113-689B-2H-2	Dictyophimus crisiae	1	1	0	no
113-689B-2H-2	Dictyophimus macropterus	1	1	0	no
113-689B-2H-2	Dictyophimus planctonis	48	26	22	no
113-689B-2H-2	Druppatractus hastatus	9	7	2	no
113-689B-2H-2	Druppatractus irregularis	4	3	1	no
113-689B-2H-2	Orodapis ferrealuma	28	13	15	no
113-689B-2H-2	Eucyrtidium calvertense	18	9	9	no
113-689B-2H-2	Eucyrtidium cienkowskii	3	1	2	no
113-689B-2H-2	Eucyrtidium inflatum	1	1	0	no
113-689B-2H-2	Eucyrtidium pseudoinflatum	1	0	1	no
113-689B-2H-2	Euscenarium joergenseni	2	0	2	no
113-689B-2H-2	Gondwanaria cylindrica	2	1	1	no
113-689B-2H-2	Gondwanaria deflandrei	2	1	1	no
113-689B-2H-2	Helisoma dispar	1	1	0	no
113-689B-2H-2	Helotholus praevema	1100	440	660	yes
113-689B-2H-2	Helotholus vema	144	72	72	no
113-689B-2H-2	Hexacontium enthacanthum	3	3	0	no
113-689B-2H-2	Hexacontium pachydermum	2	1	1	no
113-689B-2H-2	Hexalonche philosophica	9	4	5	no
113-689B-2H-2	Hexapyle dodecantha	26	20	6	no
113-689B-2H-2	Lampromitra dodecaster	3	1	2	no
113-689B-2H-2	Lampromitra quadricuspis	1	1	0	no
113-689B-2H-2	Larcopyle buetschlii	13	3	10	no
113-689B-2H-2	Larcopyle hayesi	11	7	4	no
113-689B-2H-2	Larcopyle labyrinthusa	47	19	28	no
113-689B-2H-2	Larcopyle peregrinator	2	2	0	no
113-689B-2H-2	Larcopyle polyacantha polyacantha	28	11	17	no
113-689B-2H-2	Larcopyle polyacantha titan	15	7	8	no
113-689B-2H-2	Larcopyle pylomaticus	53	29	24	no
113-689B-2H-2	Larcopyle titan	31	12	19	no
113-689B-2H-2	Larcopyle weddelium	116	58	58	no
113-689B-2H-2	Larcospira moschkovskii	1	1	0	no
113-689B-2H-2	Litharachnium tentorium	13	3	10	no
113-689B-2H-2	Lithelius minor	3	2	1	no
113-689B-2H-2	Lithelius nautiloides	4	3	1	no
113-689B-2H-2	Lithomelissa setosa	1	1	0	no
113-689B-2H-2	Lithomelissa sp11	24	17	7	no
113-689B-2H-2	Lithomelissa sp20	2	0	2	no
113-689B-2H-2	Lithomelissa stigi	11	5	6	no
113-689B-2H-2	Lithomelissa tricornis	5	5	0	no
113-689B-2H-2	Lonchosphaera spicata	6	3	3	no
113-689B-2H-2	Lophophaena clevei	3	1	2	no
113-689B-2H-2	Lophospyris pentagona	1	1	0	no
113-689B-2H-2	Lychnocanium grande	1	0	1	no
113-689B-2H-2	Mitrocalpis aranaefera	1	1	0	no
113-689B-2H-2	Perichlamydium praetextum	2	1	1	no
113-689B-2H-2	Peridium longispinum	4	2	2	no
113-689B-2H-2	Peripyramis circumtexta	6	1	5	no
113-689B-2H-2	Phaeodarian spA	1	1	0	no
113-689B-2H-2	Phorticium clevei	23	11	12	no
113-689B-2H-2	Lithomelissa vespa	1	0	1	no
113-689B-2H-2	Plagoniid sp4	58	41	17	no
113-689B-2H-2	Plagoniid spB	1	1	0	no
113-689B-2H-2	Plectopyramis dodecumma	1	0	1	no
113-689B-2H-2	Porospathis holostoma	1	0	1	no
113-689B-2H-2	Prunoid spD	1	1	0	no
113-689B-2H-2	Pseudocubus obeliscus	1	1	0	no
113-689B-2H-2	Pseudodictyophimus gracillipes	8	3	5	no
113-689B-2H-2	Pseudodictyophimus platycephalus	1	1	0	no
113-689B-2H-2	Pseudodictyophimus spY	1	0	1	no
113-689B-2H-2	Pseudodictyophimus tanythorax	10	7	3	no
113-689B-2H-2	Pterocanium charybdeum trilobum	1	0	1	no
113-689B-2H-2	Rhizosphaera antarctica	6	3	3	no
113-689B-2H-2	Saccospyris antarctica	102	80	22	no
113-689B-2H-2	Saccospyris conithorax	1	1	0	no
113-689B-2H-2	Saccospyris praeantarctica	408	163	245	yes
113-689B-2H-2	Sethoconus tabulatus	1	1	0	no
113-689B-2H-2	Siphocampe arachnea	165	71	94	no
113-689B-2H-2	Siphostichoartus jahnae	2	2	0	no
113-689B-2H-2	Sphaeropyle robusta	22	10	12	no
113-689B-2H-2	Sphaerozoum punctatum	1	1	0	no
113-689B-2H-2	Spongodiscid spH	1	0	1	no
113-689B-2H-2	Spongodiscus craticulatus	225	85	140	no
113-689B-2H-2	Spongodiscus osculosus	70	27	43	no
113-689B-2H-2	Spongoplegma spD	1	0	1	no
113-689B-2H-2	Spongoplegma variabile	5	4	1	no
113-689B-2H-2	Spongotrochus glacialis	11	10	1	no
113-689B-2H-2	Stauroxiphos communis	2	1	1	no
113-689B-2H-2	Stylatractus neptunus	2	0	2	no
113-689B-2H-2	Stylatractus universus	15	7	8	no
113-689B-2H-2	Stylochlamydium venustum	3	2	1	no
113-689B-2H-2	Stylodictya aculeata	2	2	0	no
113-689B-2H-2	Stylodictya ocellata	1	1	0	no
113-689B-2H-2	Stylodictya validispina	49	16	33	no
113-689B-2H-2	Stylosphaera angelina	31	8	23	no
113-689B-2H-2	Tetrapyle octacantha	28	18	10	no
113-689B-2H-2	Thecosphaera inermis	2	2	0	no
113-689B-2H-2	Thecosphaera japonica	14	6	8	no
113-689B-2H-2	Thecosphaera pseudojaponica	1	1	0	no
113-689B-2H-2	Theocorys redondoensis	1	1	0	no
113-689B-2H-2	Triceraspyris spQ	1	0	1	no
113-689B-2H-2	Triospyrid spP	1	0	1	no
113-689B-2H-2	Dendrospyris jobstae	1	1	0	no
113-689B-2H-2	Trisulcus nanus	45	27	18	no
113-689B-2H-2	Undetermined	6	4	2	no
113-689B-2H-2	Velicucullus altus	69	34	35	no
113-689B-2H-2	Velicucullus oddgurneri	1	1	0	no
113-689B-2H-4	Acanthodesmia micropora	4	1	3	no
113-689B-2H-4	Acrosphaera australis	1	0	1	no
113-689B-2H-4	Acrosphaera labrata	1	1	0	no
113-689B-2H-4	Acrosphaera mercurius	18	7	11	no
113-689B-2H-4	Actinomma leptoderma	2	2	0	no
113-689B-2H-4	Actinomma popofskii	19	1	18	no
113-689B-2H-4	Actinommid spC	1	0	1	no
113-689B-2H-4	Antarctissa cylindrica	639	213	426	yes
113-689B-2H-4	Antarctissa deflandrei	2	2	0	no
113-689B-2H-4	Antarctissa denticulata	498	166	332	yes
113-689B-2H-4	Antarctissa robusta	9	2	7	no
113-689B-2H-4	Antarctissa ballista	158	70	88	no
113-689B-2H-4	Antarctissa strelkovi	2787	929	1858	yes
113-689B-2H-4	Arachnocorallium sp5	1	1	0	no
113-689B-2H-4	Artostrobus annulatus	309	101	208	no
113-689B-2H-4	Artostrobus joergenseni	2	1	1	no
113-689B-2H-4	Artostrobus quadriporus	1	1	0	no
113-689B-2H-4	Botryostrobus auritus/australis	145	38	107	no
113-689B-2H-4	Carposphaera annikae	1	1	0	no
113-689B-2H-4	Cenosphaera cristata	7	3	4	no
113-689B-2H-4	Ceratocyrtis cantharoides	1	1	0	no
113-689B-2H-4	Ceratocyrtis histricosa	10	5	5	no
113-689B-2H-4	Ceratocyrtis mashae	4	3	1	no
113-689B-2H-4	Ceratocyrtis spF	1	0	1	no
113-689B-2H-4	Challengeron diodon?	1	0	1	no
113-689B-2H-4	Cladoscenium groupN	4	1	3	no
113-689B-2H-4	Clathrocorys spJ	1	0	1	no
113-689B-2H-4	Cornutella profunda	88	31	57	no
113-689B-2H-4	Corythomelissa horrida	1	0	1	no
113-689B-2H-4	Corythospyris fiscella	2	1	1	no
113-689B-2H-4	Cycladophora bicornis	30	10	20	no
113-689B-2H-4	Cycladophora conica	2	0	2	no
113-689B-2H-4	Cycladophora pliocenica	58	21	37	no
113-689B-2H-4	Cyrtolagena laguncula	2	0	2	no
113-689B-2H-4	Dendrospyris haysi	228	92	136	no
113-689B-2H-4	Dendrospyris rhodospyroides	5	3	2	no
113-689B-2H-4	Dendrospyris sakaii	2	1	1	no
113-689B-2H-4	Desmospyris spongiosa	16	3	13	no
113-689B-2H-4	Dictyophimus archipilium	1	0	1	no
113-689B-2H-4	Dictyophimus hirundo	3	1	2	no
113-689B-2H-4	Dictyophimus planctonis	30	12	18	no
113-689B-2H-4	Dimelissa thoracites	1	1	0	no
113-689B-2H-4	Dipylissa bensoni	1	0	1	no
113-689B-2H-4	Druppatractus hastatus	4	1	3	no
113-689B-2H-4	Druppatractus irregularis	1	0	1	no
113-689B-2H-4	Drymyomma elegans	4	0	4	no
113-689B-2H-4	Echinomma sphaerechinus	1	0	1	no
113-689B-2H-4	Enneaphormis rotula	1	0	1	no
113-689B-2H-4	Orodapis ferrealuma	13	4	9	no
113-689B-2H-4	Eucyrtidium acuminatum	1	1	0	no
113-689B-2H-4	Eucyrtidium calvertense	18	6	12	no
113-689B-2H-4	Eucyrtidium cienkowskii	9	4	5	no
113-689B-2H-4	Eucyrtidium teuscheri	4	1	3	no
113-689B-2H-4	Euscenarium joergenseni	11	7	4	no
113-689B-2H-4	Gondwanaria cylindrica	3	0	3	no
113-689B-2H-4	Helisoma dispar	7	3	4	no
113-689B-2H-4	Helotholus praevema	414	138	276	yes
113-689B-2H-4	Helotholus vema	18	5	13	no
113-689B-2H-4	Hexacontium pachydermum	12	2	10	no
113-689B-2H-4	Hexalonche aristarchi	1	1	0	no
113-689B-2H-4	Hexalonche philosophica	6	5	1	no
113-689B-2H-4	Hexapyle dodecantha	22	6	16	no
113-689B-2H-4	Joergensenium appolo	2	0	2	no
113-689B-2H-4	Lampromitra dodecaster	1	0	1	no
113-689B-2H-4	Larcopyle augusti	1	1	0	no
113-689B-2H-4	Larcopyle buetschlii	23	17	6	no
113-689B-2H-4	Larcopyle hayesi	5	3	2	no
113-689B-2H-4	Larcopyle labyrinthusa	41	16	25	no
113-689B-2H-4	Larcopyle peregrinator	6	2	4	no
113-689B-2H-4	Larcopyle polyacantha polyacantha	128	37	91	no
113-689B-2H-4	Larcopyle polyacantha titan	12	8	4	no
113-689B-2H-4	Larcopyle pylomaticus	93	37	56	no
113-689B-2H-4	Larcopyle titan	52	14	38	no
113-689B-2H-4	Larcopyle weddelium	120	62	58	no
113-689B-2H-4	Larcospira moschkovskii	7	4	3	no
113-689B-2H-4	Litharachnium tentorium	3	2	1	no
113-689B-2H-4	Lithelius nautiloides	1	0	1	no
113-689B-2H-4	Lithomelissa sp11	2	0	2	no
113-689B-2H-4	Lithomelissa sp20	1	1	0	no
113-689B-2H-4	Lithomelissa tricornis	1	1	0	no
113-689B-2H-4	Lonchosphaera spH	2	0	2	no
113-689B-2H-4	Lonchosphaera spicata	1	0	1	no
113-689B-2H-4	Lophospyris pentagona	2	1	1	no
113-689B-2H-4	Lychnocanium grande	10	3	7	no
113-689B-2H-4	Pentapylonium implicatum	1	0	1	no
113-689B-2H-4	Perichlamydium praetextum	21	4	17	no
113-689B-2H-4	Peripyramis circumtexta	1	0	1	no
113-689B-2H-4	Phormostichoartus corbula	5	2	3	no
113-689B-2H-4	Phorticium clevei	5	4	1	no
113-689B-2H-4	Plannapus mauricei	1	0	1	no
113-689B-2H-4	Protocystis micropelecus	1	1	0	no
113-689B-2H-4	Prunoid spD	17	6	11	no
113-689B-2H-4	Pseudodictyophimus gracillipes	63	28	35	no
113-689B-2H-4	Pseudodictyophimus platycephalus	1	1	0	no
113-689B-2H-4	Pseudodictyophimus spY	2	1	1	no
113-689B-2H-4	Pseudodictyophimus tanythorax	3	2	1	no
113-689B-2H-4	Saccospyris antarctica	26	14	12	no
113-689B-2H-4	Saccospyris conithorax	1	1	0	no
113-689B-2H-4	Saccospyris praeantarctica	27	11	16	no
113-689B-2H-4	Siphocampe arachnea	56	20	36	no
113-689B-2H-4	Siphonosphaera vesuvius	1	0	1	no
113-689B-2H-4	Siphostichoartus jahnae	2	0	2	no
113-689B-2H-4	Sphaeropyle antarctica	3	1	2	no
113-689B-2H-4	Sphaeropyle robusta	14	5	9	no
113-689B-2H-4	Spongodiscus craticulatus	268	103	165	no
113-689B-2H-4	Spongodiscus osculosus	165	45	120	no
113-689B-2H-4	Spongoplegma variabile	6	3	3	no
113-689B-2H-4	Spongotrochus glacialis	30	7	23	no
113-689B-2H-4	Stauroxiphos communis	3	1	2	no
113-689B-2H-4	Stylatractus neptunus	4	2	2	no
113-689B-2H-4	Stylatractus santaennae	1	0	1	no
113-689B-2H-4	Stylatractus universus	39	20	19	no
113-689B-2H-4	Stylochlamydium venustum	20	6	14	no
113-689B-2H-4	Stylodictya validispina	110	36	74	no
113-689B-2H-4	Stylosphaera angelina	1	0	1	no
113-689B-2H-4	Tetraplecta sp16	1	1	0	no
113-689B-2H-4	Tetrapyle octacantha	26	11	15	no
113-689B-2H-4	Thecosphaera japonica	52	9	43	no
113-689B-2H-4	Thecosphaera miocenica	2	0	2	no
113-689B-2H-4	Tholospyris gephyristes	3	1	2	no
113-689B-2H-4	Dendrospyris jobstae	7	4	3	no
113-689B-2H-4	Trisulcus nanus	25	10	15	no
113-689B-2H-4	Undetermined	4	1	3	no
113-689B-2H-4	Velicucullus altus	28	12	16	no
113-689B-2H-4	Velicucullus oddgurneri	1	1	0	no
113-689B-2H-6	Acanthodesmia micropora	16	3	13	no
113-689B-2H-6	Acrosphaera labrata	30	2	28	no
113-689B-2H-6	Acrosphaera mercurius	13	1	12	no
113-689B-2H-6	Actinomma leptoderma	6	0	6	no
113-689B-2H-6	Actinomma popofskii	1	0	1	no
113-689B-2H-6	Actinommid spC	1	0	1	no
113-689B-2H-6	Actinommid spO	1	0	1	no
113-689B-2H-6	Antarctissa cylindrica	728	104	624	yes
113-689B-2H-6	Antarctissa denticulata	742	106	636	yes
113-689B-2H-6	Antarctissa strelkovi	3024	432	2592	yes
113-689B-2H-6	Arachnocorys circumtexta	1	0	1	no
113-689B-2H-6	Arachnosphaera dichotoma	1	0	1	no
113-689B-2H-6	Artostrobus annulatus	23	2	21	no
113-689B-2H-6	Botryostrobus auritus/australis	75	14	61	no
113-689B-2H-6	Cenosphaera cristata	11	4	7	no
113-689B-2H-6	Ceratocyrtis cantharoides	1	1	0	no
113-689B-2H-6	Ceratocyrtis galeus	2	0	2	no
113-689B-2H-6	Ceratocyrtis histricosa	29	3	26	no
113-689B-2H-6	Ceratocyrtis mashae	16	2	14	no
113-689B-2H-6	Ceratocyrtis dolvenianus	5	1	4	no
113-689B-2H-6	Ceratocyrtis morawanensis	2	0	2	no
113-689B-2H-6	Cladoscenium ancoratum	1	0	1	no
113-689B-2H-6	Cladoscenium groupN	1	0	1	no
113-689B-2H-6	Cladoscenium tricolpium	1	1	0	no
113-689B-2H-6	Clathrocorys murrayi	1	0	1	no
113-689B-2H-6	Clathrocorys spJ	1	0	1	no
113-689B-2H-6	Collosphaerid reynoldsi	4	1	3	no
113-689B-2H-6	Cornutella profunda	29	8	21	no
113-689B-2H-6	Corythomelissa horrida	1	0	1	no
113-689B-2H-6	Corythospyris fiscella	3	1	2	no
113-689B-2H-6	Corythospyris jubata	1	0	1	no
113-689B-2H-6	Cycladophora bicornis	176	18	158	no
113-689B-2H-6	Cycladophora conica	3	1	2	no
113-689B-2H-6	Cycladophora cornutoides	4	0	4	no
113-689B-2H-6	Cycladophora cosma	1	0	1	no
113-689B-2H-6	Cycladophora pliocenica	99	16	83	no
113-689B-2H-6	Cyrtolagena laguncula	1	0	1	no
113-689B-2H-6	Dendrospyris haysi	196	28	168	yes
113-689B-2H-6	Dendrospyris sakaii	20	1	19	no
113-689B-2H-6	Dictyophimus crisiae	3	1	2	no
113-689B-2H-6	Dictyophimus hirundo	1	1	0	no
113-689B-2H-6	Dictyophimus planctonis	75	10	65	no
113-689B-2H-6	Druppatractus hastatus	9	2	7	no
113-689B-2H-6	Druppatractus irregularis	1	0	1	no
113-689B-2H-6	Enneaphormis rotula	13	5	8	no
113-689B-2H-6	Orodapis ferrealuma	3	1	2	no
113-689B-2H-6	Eucyrtidium acuminatum	4	0	4	no
113-689B-2H-6	Eucyrtidium calvertense	10	0	10	no
113-689B-2H-6	Eucyrtidium cienkowskii	1	0	1	no
113-689B-2H-6	Eucyrtidium inflatum	1	0	1	no
113-689B-2H-6	Eucyrtidium teuscheri	10	1	9	no
113-689B-2H-6	Euscenarium joergenseni	8	2	6	no
113-689B-2H-6	Gondwanaria campanulaeformis	1	1	0	no
113-689B-2H-6	Gondwanaria cylindrica	4	2	2	no
113-689B-2H-6	Helisoma dispar	4	0	4	no
113-689B-2H-6	Helotholus praevema	644	92	552	yes
113-689B-2H-6	Hexacontium enthacanthum	2	1	1	no
113-689B-2H-6	Hexalonche aristarchi	2	0	2	no
113-689B-2H-6	Hexapyle dodecantha	35	8	27	no
113-689B-2H-6	Joergensenium appolo	1	1	0	no
113-689B-2H-6	Lampromitra quadricuspis	3	0	3	no
113-689B-2H-6	Larcopyle buetschlii	4	3	1	no
113-689B-2H-6	Larcopyle labyrinthusa	5	1	4	no
113-689B-2H-6	Larcopyle polyacantha polyacantha	2	0	2	no
113-689B-2H-6	Larcopyle pylomaticus	106	14	92	no
113-689B-2H-6	Larcopyle weddelium	110	22	88	no
113-689B-2H-6	Litharachnium tentorium	3	1	2	no
113-689B-2H-6	Lithelius nautiloides	4	2	2	no
113-689B-2H-6	Lithomelissa sp20	1	1	0	no
113-689B-2H-6	Lithomelissa tricornis	32	9	23	no
113-689B-2H-6	Lonchosphaera spH	8	2	6	no
113-689B-2H-6	Lonchosphaera spicata	7	0	7	no
113-689B-2H-6	Lophophaena simplex	1	1	0	no
113-689B-2H-6	Lophospyris pentagona	1	0	1	no
113-689B-2H-6	Lychnocanium grande	11	1	10	no
113-689B-2H-6	Octopyle stenozona	4	1	3	no
113-689B-2H-6	Pentapylonium implicatum	1	0	1	no
113-689B-2H-6	Periarachnium periplectum	1	0	1	no
113-689B-2H-6	Perichlamydium praetextum	28	6	22	no
113-689B-2H-6	Peripyramis circumtexta	4	1	3	no
113-689B-2H-6	Phormacantha hystrix	2	1	1	no
113-689B-2H-6	Phorticium clevei	10	2	8	no
113-689B-2H-6	Botryopera gibbera	1	0	1	no
113-689B-2H-6	Plagoniid sp4	12	10	2	no
113-689B-2H-6	Plectacantha oikiskos	2	0	2	no
113-689B-2H-6	Prunoid spD	25	3	22	no
113-689B-2H-6	Pseudocubus obeliscus	1	1	0	no
113-689B-2H-6	Pseudodictyophimus gracillipes	163	24	139	no
113-689B-2H-6	Pseudodictyophimus platycephalus	8	1	7	no
113-689B-2H-6	Pseudodictyophimus spY	1	0	1	no
113-689B-2H-6	Pseudodictyophimus tanythorax	3	0	3	no
113-689B-2H-6	Pterocanium charybdeum trilobum	2	0	2	no
113-689B-2H-6	Rhizoplegma boreale	1	0	1	no
113-689B-2H-6	Saccospyris antarctica	27	7	20	no
113-689B-2H-6	Siphocampe arachnea	1	0	1	no
113-689B-2H-6	Sphaeropyle antarctica	2	1	1	no
113-689B-2H-6	Sphaeropyle robusta	8	0	8	no
113-689B-2H-6	Sphaerozoum punctatum	1	0	1	no
113-689B-2H-6	Spirocyrtis subscalaris	1	1	0	no
113-689B-2H-6	Spongodiscus craticulatus	54	7	47	no
113-689B-2H-6	Spongodiscus osculosus	56	13	43	no
113-689B-2H-6	Spongoplegma variabile	1	0	1	no
113-689B-2H-6	Spongotrochus glacialis	14	2	12	no
113-689B-2H-6	Stichopilium bicorne	2	0	2	no
113-689B-2H-6	Stylatractid groupA	2	0	2	no
113-689B-2H-6	Stylatractus neptunus	1	0	1	no
113-689B-2H-6	Stylatractus universus	9	1	8	no
113-689B-2H-6	Stylodictya validispina	137	15	122	no
113-689B-2H-6	Stylosphaera angelina	5	0	5	no
113-689B-2H-6	Tetraplecta pinigera	2	0	2	no
113-689B-2H-6	Tetraplecta sp16	2	1	1	no
113-689B-2H-6	Tetrapyle octacantha	13	5	8	no
113-689B-2H-6	Thecosphaera japonica	3	2	1	no
113-689B-2H-6	Tholospyris gephyristes	1	1	0	no
113-689B-2H-6	Tripophaenoscenium laimingi	2	0	2	no
113-689B-2H-6	Trisulcus nanus	31	10	21	no
113-689B-2H-6	Undetermined	8	1	7	no
113-689B-2H-6	Velicucullus altus	37	6	31	no
113-689B-2H-6	Velicucullus oddgurneri	2	1	1	no
113-689B-3H-1	Acanthodesmia micropora	6	6	0	no
113-689B-3H-1	Acrosphaera australis	5	1	4	no
113-689B-3H-1	Acrosphaera labrata	441	126	315	yes
113-689B-3H-1	Acrosphaera mercurius	34	7	27	no
113-689B-3H-1	Actinomma boreale	2	0	2	no
113-689B-3H-1	Actinomma spE	1	0	1	no
113-689B-3H-1	Actinomma leptoderma	8	5	3	no
113-689B-3H-1	Actinomma popofskii	20	20	0	no
113-689B-3H-1	Actinomma livae	1	0	1	no
113-689B-3H-1	Actinommid spC	2	1	1	no
113-689B-3H-1	Amphiplecta tripleura	1	1	0	no
113-689B-3H-1	Amphymenium challengerae	7	2	5	no
113-689B-3H-1	Antarctissa cylindrica	187	54	133	no
113-689B-3H-1	Antarctissa deflandrei	32	17	15	no
113-689B-3H-1	Antarctissa denticulata	578	165	413	yes
113-689B-3H-1	Antarctissa robusta	28	13	15	no
113-689B-3H-1	Antarctissa ballista	125	43	82	no
113-689B-3H-1	Antarctissa strelkovi	2931	837	2094	yes
113-689B-3H-1	Arachnocorallium sp5	1	0	1	no
113-689B-3H-1	Artostrobus annulatus	350	96	254	no
113-689B-3H-1	Artostrobus joergenseni	7	6	1	no
113-689B-3H-1	Botryostrobus auritus/australis	211	54	157	no
113-689B-3H-1	Cannobotryid spB	1	0	1	no
113-689B-3H-1	Cenosphaera cristata	10	6	4	no
113-689B-3H-1	Cenosphaera spK	1	0	1	no
113-689B-3H-1	Ceratocyrtis cantharoides	1	0	1	no
113-689B-3H-1	Ceratocyrtis histricosa	1	0	1	no
113-689B-3H-1	Ceratocyrtis mashae	3	3	0	no
113-689B-3H-1	Ceratocyrtis spF	2	0	2	no
113-689B-3H-1	Cladoscenium ancoratum	5	1	4	no
113-689B-3H-1	Chitascenium cranites	3	1	2	no
113-689B-3H-1	Cladoscenium tricolpium	3	1	2	no
113-689B-3H-1	Clathrocorys spJ	1	0	1	no
113-689B-3H-1	Collosphaerid reynoldsi	6	0	6	no
113-689B-3H-1	Collosphaerid spD	2	0	2	no
113-689B-3H-1	Cornutella profunda	103	31	72	no
113-689B-3H-1	Cubotholus spp	1	0	1	no
113-689B-3H-1	Cycladophora bicornis	69	30	39	no
113-689B-3H-1	Cycladophora conica	1	0	1	no
113-689B-3H-1	Cycladophora pliocenica	87	24	63	no
113-689B-3H-1	Cycladophora spongothorax	1	0	1	no
113-689B-3H-1	Cyrtolagena laguncula	1	0	1	no
113-689B-3H-1	Dendrospyris haysi	59	19	40	no
113-689B-3H-1	Dendrospyris sakaii	2	1	1	no
113-689B-3H-1	Dictyophimus planctonis	57	21	36	no
113-689B-3H-1	Druppatractus hastatus	3	2	1	no
113-689B-3H-1	Druppatractus irregularis	2	1	1	no
113-689B-3H-1	Enneaphormis rotula	1	1	0	no
113-689B-3H-1	Orodapis ferrealuma	21	9	12	no
113-689B-3H-1	Eucyrtidium acuminatum	3	0	3	no
113-689B-3H-1	Eucyrtidium calvertense	24	8	16	no
113-689B-3H-1	Eucyrtidium inflatum	1	1	0	no
113-689B-3H-1	Eucyrtidium pseudoinflatum	1	1	0	no
113-689B-3H-1	Eucyrtidium teuscheri	2	0	2	no
113-689B-3H-1	Euscenarium joergenseni	2	1	1	no
113-689B-3H-1	Gondwanaria campanulaeformis	2	1	1	no
113-689B-3H-1	Gondwanaria cylindrica	5	2	3	no
113-689B-3H-1	Helisoma dispar	6	0	6	no
113-689B-3H-1	Helotholus praevema	45	21	24	no
113-689B-3H-1	Hexacontium enthacanthum	6	3	3	no
113-689B-3H-1	Hexacontium pachydermum	4	1	3	no
113-689B-3H-1	Hexalonche philosophica	3	1	2	no
113-689B-3H-1	Hexapyle dodecantha	30	7	23	no
113-689B-3H-1	Lamprocyclas aegles	1	1	0	no
113-689B-3H-1	Lampromitra dodecaster	1	1	0	no
113-689B-3H-1	Lampromitra quadricuspis	3	0	3	no
113-689B-3H-1	Larcopyle buetschlii	54	31	23	no
113-689B-3H-1	Larcopyle hayesi	24	9	15	no
113-689B-3H-1	Larcopyle labyrinthusa	28	2	26	no
113-689B-3H-1	Larcopyle polyacantha polyacantha	64	26	38	no
113-689B-3H-1	Larcopyle polyacantha titan	8	5	3	no
113-689B-3H-1	Larcopyle pylomaticus	116	44	72	no
113-689B-3H-1	Larcopyle titan	17	1	16	no
113-689B-3H-1	Larcopyle weddelium	180	60	120	no
113-689B-3H-1	Larcospira moschkovskii	5	4	1	no
113-689B-3H-1	Liosphaera antarctica	2	1	1	no
113-689B-3H-1	Litharachnium tentorium	5	2	3	no
113-689B-3H-1	Lithelius minor	1	0	1	no
113-689B-3H-1	Lithelius nautiloides	10	6	4	no
113-689B-3H-1	Lithomelissa sp20	1	1	0	no
113-689B-3H-1	Lithomelissa stigi	2	2	0	no
113-689B-3H-1	Lithomelissa tricornis	10	7	3	no
113-689B-3H-1	Lonchosphaera spicata	4	0	4	no
113-689B-3H-1	Lophophaena clevei	2	2	0	no
113-689B-3H-1	Lophospyris pentagona	3	0	3	no
113-689B-3H-1	Lychnocanium conica	3	1	2	no
113-689B-3H-1	Lychnocanium grande	480	137	343	yes
113-689B-3H-1	Octopyle stenozona	2	1	1	no
113-689B-3H-1	Pentapylonium implicatum	1	1	0	no
113-689B-3H-1	Perichlamydium praetextum	21	7	14	no
113-689B-3H-1	Peridium longispinum	7	5	2	no
113-689B-3H-1	Peripyramis circumtexta	1	0	1	no
113-689B-3H-1	Phormostichoartus spG	6	2	4	no
113-689B-3H-1	Phorticium clevei	10	4	6	no
113-689B-3H-1	Protoscenium sp18	1	0	1	no
113-689B-3H-1	Prunoid spD	7	1	6	no
113-689B-3H-1	Pseudocubus obeliscus	2	1	1	no
113-689B-3H-1	Pseudodictyophimus gracillipes	26	9	17	no
113-689B-3H-1	Pseudodictyophimus platycephalus	2	2	0	no
113-689B-3H-1	Pseudodictyophimus spY	3	1	2	no
113-689B-3H-1	Pseudodictyophimus tanythorax	7	5	2	no
113-689B-3H-1	Pterocanium korotnevi	3	0	3	no
113-689B-3H-1	Rhizosphaera antarctica	1	0	1	no
113-689B-3H-1	Saccospyris antarctica	45	12	33	no
113-689B-3H-1	Saccospyris conithorax	1	0	1	no
113-689B-3H-1	Saccospyris praeantarctica	2	0	2	no
113-689B-3H-1	Sethoconus tabulatus	4	2	2	no
113-689B-3H-1	Siphocampe arachnea	84	24	60	no
113-689B-3H-1	Siphonosphaera vesuvius	3	1	2	no
113-689B-3H-1	Siphostichoartus jahnae	1	0	1	no
113-689B-3H-1	Sphaeropyle antarctica	1	0	1	no
113-689B-3H-1	Sphaeropyle robusta	32	8	24	no
113-689B-3H-1	Sphaerozoum punctatum	2	1	1	no
113-689B-3H-1	Spongodiscid spA	1	0	1	no
113-689B-3H-1	Spongodiscus craticulatus	349	80	269	no
113-689B-3H-1	Spongodiscus osculosus	154	55	99	no
113-689B-3H-1	Spongoplegma variabile	9	4	5	no
113-689B-3H-1	Spongotrochus glacialis	45	16	29	no
113-689B-3H-1	Spumellarian spB	1	0	1	no
113-689B-3H-1	Stauroxiphos communis	4	2	2	no
113-689B-3H-1	Stylatractus neptunus	5	0	5	no
113-689B-3H-1	Stylatractus universus	9	2	7	no
113-689B-3H-1	Stylochlamydium venustum	18	6	12	no
113-689B-3H-1	Stylodictya validispina	147	39	108	no
113-689B-3H-1	Stylosphaera angelina	27	1	26	no
113-689B-3H-1	Tetrapyle octacantha	106	49	57	no
113-689B-3H-1	Thecosphaera inermis	1	1	0	no
113-689B-3H-1	Thecosphaera japonica	57	12	45	no
113-689B-3H-1	Tholospyris gephyristes	4	1	3	no
113-689B-3H-1	Triceraspyris coronata	2	1	1	no
113-689B-3H-1	Trisulcus nanus	12	2	10	no
113-689B-3H-1	Undetermined	9	4	5	no
113-689B-3H-1	Velicucullus altus	18	4	14	no
113-689B-3H-2	Acanthodesmia micropora	5	3	2	no
113-689B-3H-2	Acanthosphaera actinota	1	0	1	no
113-689B-3H-2	Acrosphaera australis	3	1	2	no
113-689B-3H-2	Acrosphaera labrata	226	87	139	no
113-689B-3H-2	Acrosphaera mercurius	17	5	12	no
113-689B-3H-2	Acrosphaera murrayana	2	1	1	no
113-689B-3H-2	Actinomma boreale	1	0	1	no
113-689B-3H-2	Actinomma popofskii	1	0	1	no
113-689B-3H-2	Actinomma livae	1	1	0	no
113-689B-3H-2	Actinomma nigriniae	2	2	0	no
113-689B-3H-2	Actinommid spC	5	2	3	no
113-689B-3H-2	Actinommid spL	1	1	0	no
113-689B-3H-2	Actinommid spM	1	1	0	no
113-689B-3H-2	Amphimelissa hibernifortuna	2	1	1	no
113-689B-3H-2	Amphymenium challengerae	1	0	1	no
113-689B-3H-2	Antarctissa cylindrica	191	59	132	no
113-689B-3H-2	Antarctissa deflandrei	6	3	3	no
113-689B-3H-2	Antarctissa denticulata	504	144	360	yes
113-689B-3H-2	Antarctissa robusta	12	4	8	no
113-689B-3H-2	Antarctissa ballista	101	45	56	no
113-689B-3H-2	Antarctissa strelkovi	3334	952	2382	yes
113-689B-3H-2	Arachnocorallium sp5	3	2	1	no
113-689B-3H-2	Arachnosphaera dichotoma	1	1	0	no
113-689B-3H-2	Archiscenium quadrispinum	1	0	1	no
113-689B-3H-2	Artostrobus annulatus	259	62	197	no
113-689B-3H-2	Artostrobus joergenseni	11	5	6	no
113-689B-3H-2	Botryostrobus auritus/australis	151	37	114	no
113-689B-3H-2	Cadium bullatum	1	0	1	no
113-689B-3H-2	Cenosphaera cristata	5	3	2	no
113-689B-3H-2	Ceratocyrtis histricosa	3	2	1	no
113-689B-3H-2	Ceratocyrtis mashae	2	2	0	no
113-689B-3H-2	Challengeron lingi	1	0	1	no
113-689B-3H-2	Cladoscenium ancoratum	3	2	1	no
113-689B-3H-2	Chitascenium cranites	1	0	1	no
113-689B-3H-2	Clathrocorys spJ	4	2	2	no
113-689B-3H-2	Collosphaerid reynoldsi	8	1	7	no
113-689B-3H-2	Collosphaerid spD	1	0	1	no
113-689B-3H-2	Cornutella profunda	104	31	73	no
113-689B-3H-2	Corythomelissa horrida	2	2	0	no
113-689B-3H-2	Corythospyris fiscella	2	0	2	no
113-689B-3H-2	Cubotholus spp	3	3	0	no
113-689B-3H-2	Cycladophora bicornis	34	10	24	no
113-689B-3H-2	Cycladophora conica	2	2	0	no
113-689B-3H-2	Cycladophora pliocenica	54	17	37	no
113-689B-3H-2	Cyrtolagena laguncula	3	2	1	no
113-689B-3H-2	Dendrospyris haysi	5	4	1	no
113-689B-3H-2	Desmospyris spongiosa	1	1	0	no
113-689B-3H-2	Dictyophimus crisiae	3	0	3	no
113-689B-3H-2	Dictyophimus planctonis	45	13	32	no
113-689B-3H-2	Druppatractus hastatus	2	0	2	no
113-689B-3H-2	Druppatractus irregularis	11	1	10	no
113-689B-3H-2	Drymyomma elegans	4	2	2	no
113-689B-3H-2	Enneaphormis rotula	7	1	6	no
113-689B-3H-2	Orodapis ferrealuma	20	7	13	no
113-689B-3H-2	Eucyrtidium calvertense	10	4	6	no
113-689B-3H-2	Eucyrtidium cienkowskii	1	1	0	no
113-689B-3H-2	Eucyrtidium inflatum	1	0	1	no
113-689B-3H-2	Eucyrtidium pseudoinflatum	2	1	1	no
113-689B-3H-2	Eucyrtidium teuscheri	1	0	1	no
113-689B-3H-2	Euscenarium joergenseni	4	0	4	no
113-689B-3H-2	Gondwanaria cylindrica	3	1	2	no
113-689B-3H-2	Heliodiscus asteriscus	1	0	1	no
113-689B-3H-2	Helisoma dispar	10	3	7	no
113-689B-3H-2	Helotholus praevema	58	25	33	no
113-689B-3H-2	Hexacontium pachydermum	6	5	1	no
113-689B-3H-2	Hexalonche philosophica	2	1	1	no
113-689B-3H-2	Hexapyle dodecantha	14	7	7	no
113-689B-3H-2	Lampromitra dodecaster	5	0	5	no
113-689B-3H-2	Lampromitra quadricuspis	3	0	3	no
113-689B-3H-2	Larcopyle buetschlii	11	3	8	no
113-689B-3H-2	Larcopyle hayesi	22	6	16	no
113-689B-3H-2	Larcopyle labyrinthusa	28	8	20	no
113-689B-3H-2	Larcopyle peregrinator	2	1	1	no
113-689B-3H-2	Larcopyle polyacantha amplissima	1	0	1	no
113-689B-3H-2	Larcopyle polyacantha polyacantha	94	35	59	no
113-689B-3H-2	Larcopyle polyacantha titan	25	2	23	no
113-689B-3H-2	Larcopyle pylomaticus	61	23	38	no
113-689B-3H-2	Larcopyle titan	18	3	15	no
113-689B-3H-2	Larcopyle weddelium	164	86	78	no
113-689B-3H-2	Liosphaera antarctica	1	0	1	no
113-689B-3H-2	Litharachnium tentorium	2	1	1	no
113-689B-3H-2	Lithelius nautiloides	4	1	3	no
113-689B-3H-2	Lithomelissa sp11	2	0	2	no
113-689B-3H-2	Lithomelissa stigi	9	4	5	no
113-689B-3H-2	Lithomelissa tricornis	9	3	6	no
113-689B-3H-2	Lonchosphaera spH	1	0	1	no
113-689B-3H-2	Lonchosphaera spicata	5	1	4	no
113-689B-3H-2	Lophophaena clevei	2	0	2	no
113-689B-3H-2	Lophospyris pentagona	2	1	1	no
113-689B-3H-2	Lychnocanium conica	29	12	17	no
113-689B-3H-2	Lychnocanium grande	545	121	424	yes
113-689B-3H-2	Syscioscenium wabisabi	1	0	1	no
113-689B-3H-2	Octopyle stenozona	1	0	1	no
113-689B-3H-2	Periarachnium periplectum	1	0	1	no
113-689B-3H-2	Perichlamydium praetextum	6	2	4	no
113-689B-3H-2	Peridium longispinum	4	2	2	no
113-689B-3H-2	Peripyramis circumtexta	1	0	1	no
113-689B-3H-2	Phaeodarian spA	2	1	1	no
113-689B-3H-2	Phormostichoartus spG	6	1	5	no
113-689B-3H-2	Phorticium clevei	6	4	2	no
113-689B-3H-2	Botryopera gibbera	1	0	1	no
113-689B-3H-2	Plagoniid spB	1	0	1	no
113-689B-3H-2	Plectacantha oikiskos	1	1	0	no
113-689B-3H-2	Prunoid spD	2	2	0	no
113-689B-3H-2	Pseudocubus obeliscus	5	1	4	no
113-689B-3H-2	Pseudodictyophimus gracillipes	27	9	18	no
113-689B-3H-2	Pseudodictyophimus platycephalus	3	1	2	no
113-689B-3H-2	Pseudodictyophimus spY	3	1	2	no
113-689B-3H-2	Pseudodictyophimus tanythorax	8	3	5	no
113-689B-3H-2	Pterocanium korotnevi	3	2	1	no
113-689B-3H-2	Saccospyris antarctica	31	12	19	no
113-689B-3H-2	Saccospyris conithorax	1	0	1	no
113-689B-3H-2	Saccospyris praeantarctica	13	3	10	no
113-689B-3H-2	Sethoconus tabulatus	1	0	1	no
113-689B-3H-2	Siphocampe arachnea	48	18	30	no
113-689B-3H-2	Siphonosphaera vesuvius	1	0	1	no
113-689B-3H-2	Siphostichoartus jahnae	1	0	1	no
113-689B-3H-2	Sphaeropyle antarctica	1	0	1	no
113-689B-3H-2	Sphaeropyle robusta	35	13	22	no
113-689B-3H-2	Sphaerozoum punctatum	1	0	1	no
113-689B-3H-2	Spongodiscid spA	1	1	0	no
113-689B-3H-2	Spongodiscid spH	2	1	1	no
113-689B-3H-2	Spongodiscus craticulatus	221	69	152	no
113-689B-3H-2	Spongodiscus osculosus	64	15	49	no
113-689B-3H-2	Spongoplegma variabile	7	2	5	no
113-689B-3H-2	Spongotrochus glacialis	29	7	22	no
113-689B-3H-2	Stauroxiphos communis	37	13	24	no
113-689B-3H-2	Stylatractus neptunus	3	0	3	no
113-689B-3H-2	Stylatractus santaennae	5	3	2	no
113-689B-3H-2	Stylatractus universus	13	5	8	no
113-689B-3H-2	Stylochlamydium venustum	9	3	6	no
113-689B-3H-2	Stylodictya validispina	88	30	58	no
113-689B-3H-2	Tetraplecta pinigera	1	1	0	no
113-689B-3H-2	Tetraplecta sp16	1	1	0	no
113-689B-3H-2	Tetrapyle octacantha	80	37	43	no
113-689B-3H-2	Thecosphaera japonica	55	17	38	no
113-689B-3H-2	Tholospyris gephyristes	1	0	1	no
113-689B-3H-2	Triceraspyris coronata	15	6	9	no
113-689B-3H-2	Trisulcus nanus	19	7	12	no
113-689B-3H-2	Undetermined	4	2	2	no
113-689B-3H-2	Velicucullus altus	9	5	4	no
113-689B-3H-3	Acanthosphaera insignis	1	1	0	no
113-689B-3H-3	Acrosphaera australis	21	8	13	no
113-689B-3H-3	Acrosphaera labrata	273	86	187	no
113-689B-3H-3	Acrosphaera mercurius	28	8	20	no
113-689B-3H-3	Acrosphaera murrayana	8	5	3	no
113-689B-3H-3	Acrosphaera cuniculiauris	21	7	14	no
113-689B-3H-3	Actinomma leptoderma	2	0	2	no
113-689B-3H-3	Actinomma popofskii	39	12	27	no
113-689B-3H-3	Actinomma livae	7	1	6	no
113-689B-3H-3	Actinommid spC	1	0	1	no
113-689B-3H-3	Amphimelissa spO	4	3	1	no
113-689B-3H-3	Antarctissa cylindrica	65	31	34	no
113-689B-3H-3	Antarctissa denticulata	2174	725	1449	yes
113-689B-3H-3	Antarctissa robusta	9	1	8	no
113-689B-3H-3	Antarctissa ballista	369	123	246	yes
113-689B-3H-3	Antarctissa strelkovi	1547	516	1031	yes
113-689B-3H-3	Arachnocorallium sp5	3	1	2	no
113-689B-3H-3	Archipilium macropus	4	1	3	no
113-689B-3H-3	Archiscenium quadrispinum	1	0	1	no
113-689B-3H-3	Artostrobus annulatus	139	48	91	no
113-689B-3H-3	Artostrobus joergenseni	5	3	2	no
113-689B-3H-3	Artostrobus quadriporus	1	1	0	no
113-689B-3H-3	Botryopyle cribosa	2	0	2	no
113-689B-3H-3	Botryostrobus auritus/australis	104	44	60	no
113-689B-3H-3	Cadium bullatum	1	0	1	no
113-689B-3H-3	Cenosphaera cristata	4	2	2	no
113-689B-3H-3	Ceratocyrtis cantharoides	4	1	3	no
113-689B-3H-3	Ceratocyrtis cucullaris	2	1	1	no
113-689B-3H-3	Ceratocyrtis histricosa	7	3	4	no
113-689B-3H-3	Ceratocyrtis mashae	1	1	0	no
113-689B-3H-3	Circodiscus ellipticus	1	1	0	no
113-689B-3H-3	Collosphaerid reynoldsi	7	2	5	no
113-689B-3H-3	Cornutella clathrata	2	1	1	no
113-689B-3H-3	Cornutella profunda	142	46	96	no
113-689B-3H-3	Corythomelissa horrida	6	2	4	no
113-689B-3H-3	Corythospyris fiscella	11	4	7	no
113-689B-3H-3	Cubotholus spp	2	1	1	no
113-689B-3H-3	Cycladophora bicornis	33	13	20	no
113-689B-3H-3	Cycladophora pliocenica	24	2	22	no
113-689B-3H-3	Cyrtolagena laguncula	3	1	2	no
113-689B-3H-3	Dendrospyris haysi	24	17	7	no
113-689B-3H-3	Dendrospyris rhodospyroides	6	1	5	no
113-689B-3H-3	Dictyophimus planctonis	60	30	30	no
113-689B-3H-3	Didymocyrtis laticonus	2	1	1	no
113-689B-3H-3	Dimelissa thoracites	18	7	11	no
113-689B-3H-3	Dipylissa bensoni	1	1	0	no
113-689B-3H-3	Druppatractus hastatus	4	0	4	no
113-689B-3H-3	Druppatractus irregularis	8	2	6	no
113-689B-3H-3	Drymyomma elegans	6	2	4	no
113-689B-3H-3	Echinomma sphaerechinus	1	1	0	no
113-689B-3H-3	Enneaphormis rotula	2	1	1	no
113-689B-3H-3	Orodapis ferrealuma	7	1	6	no
113-689B-3H-3	Eucyrtidium calvertense	9	1	8	no
113-689B-3H-3	Eucyrtidium cienkowskii	1	0	1	no
113-689B-3H-3	Eucyrtidium teuscheri	4	3	1	no
113-689B-3H-3	Euscenarium joergenseni	1	1	0	no
113-689B-3H-3	Excentrodiscus japonicus	7	0	7	no
113-689B-3H-3	Excentrosphaerella sphaeroconcha	1	0	1	no
113-689B-3H-3	Gondwanaria campanulaeformis	1	0	1	no
113-689B-3H-3	Gondwanaria cylindrica	2	0	2	no
113-689B-3H-3	Haeckeliella inconstans	3	3	0	no
113-689B-3H-3	Heliodiscus asteriscus	1	0	1	no
113-689B-3H-3	Helisoma dispar	1	0	1	no
113-689B-3H-3	Helotholus praevema	441	147	294	yes
113-689B-3H-3	Hexacontium enthacanthum	3	0	3	no
113-689B-3H-3	Hexacontium pachydermum	18	12	6	no
113-689B-3H-3	Hexalonche philosophica	4	0	4	no
113-689B-3H-3	Hexapyle dodecantha	15	5	10	no
113-689B-3H-3	Joergensenium appolo	2	0	2	no
113-689B-3H-3	Lampromitra dodecaster	2	0	2	no
113-689B-3H-3	Larcopyle augusti	2	0	2	no
113-689B-3H-3	Larcopyle hayesi	8	2	6	no
113-689B-3H-3	Larcopyle labyrinthusa	31	16	15	no
113-689B-3H-3	Larcopyle peregrinator	3	0	3	no
113-689B-3H-3	Larcopyle polyacantha polyacantha	119	55	64	no
113-689B-3H-3	Larcopyle polyacantha titan	38	13	25	no
113-689B-3H-3	Larcopyle pylomaticus	9	2	7	no
113-689B-3H-3	Larcopyle titan	30	6	24	no
113-689B-3H-3	Larcopyle weddelium	78	40	38	no
113-689B-3H-3	Larcospira moschkovskii	1	1	0	no
113-689B-3H-3	Litharachnium tentorium	13	5	8	no
113-689B-3H-3	Lithelius minor	1	0	1	no
113-689B-3H-3	Lithelius nautiloides	3	2	1	no
113-689B-3H-3	Lithomelissa sp11	1	0	1	no
113-689B-3H-3	Lithomelissa spT	1	1	0	no
113-689B-3H-3	Lithomelissa tricornis	6	4	2	no
113-689B-3H-3	Lonchosphaera spicata	1	0	1	no
113-689B-3H-3	Lophophaena clevei	3	2	1	no
113-689B-3H-3	Lophospyris pentagona	1	0	1	no
113-689B-3H-3	Lychnocanium conica	7	0	7	no
113-689B-3H-3	Lychnocanium grande	232	83	149	no
113-689B-3H-3	Syscioscenium wabisabi	2	0	2	no
113-689B-3H-3	Pentapylonium implicatum	2	0	2	no
113-689B-3H-3	Peridium longispinum	5	3	2	no
113-689B-3H-3	Phaeodarian spA	1	0	1	no
113-689B-3H-3	Phormostichoartus corbula	13	6	7	no
113-689B-3H-3	Phormostichoartus spG	50	21	29	no
113-689B-3H-3	Phorticium clevei	13	4	9	no
113-689B-3H-3	Botryopera gibbera	1	1	0	no
113-689B-3H-3	Lithomelissa vespa	3	0	3	no
113-689B-3H-3	Plagoniid spB	2	1	1	no
113-689B-3H-3	Plannapus mauricei	1	0	1	no
113-689B-3H-3	Plectagonidium deflandrei	1	0	1	no
113-689B-3H-3	Plectopyramis dodecumma	1	0	1	no
113-689B-3H-3	Porospathis holostoma	1	0	1	no
113-689B-3H-3	Prunoid spD	11	3	8	no
113-689B-3H-3	Pseudocubus obeliscus	4	1	3	no
113-689B-3H-3	Pseudodictyophimus gracillipes	43	21	22	no
113-689B-3H-3	Pseudodictyophimus platycephalus	1	0	1	no
113-689B-3H-3	Pseudodictyophimus spY	2	0	2	no
113-689B-3H-3	Saccospyris antarctica	46	12	34	no
113-689B-3H-3	Saccospyris conithorax	4	3	1	no
113-689B-3H-3	Saccospyris praeantarctica	64	26	38	no
113-689B-3H-3	Sethoconus tabulatus	7	4	3	no
113-689B-3H-3	Siphocampe arachnea	68	19	49	no
113-689B-3H-3	Siphonosphaera vesuvius	8	6	2	no
113-689B-3H-3	Siphostichoartus jahnae	3	2	1	no
113-689B-3H-3	Sphaeropyle antarctica	3	1	2	no
113-689B-3H-3	Sphaeropyle robusta	48	15	33	no
113-689B-3H-3	Sphaerozoum punctatum	2	2	0	no
113-689B-3H-3	Spongodiscus craticulatus	176	38	138	no
113-689B-3H-3	Spongodiscus osculosus	126	32	94	no
113-689B-3H-3	Spongoplegma variabile	8	0	8	no
113-689B-3H-3	Spongotrochus glacialis	3	1	2	no
113-689B-3H-3	Stauroxiphos communis	38	15	23	no
113-689B-3H-3	Stichocorys peregrina	2	1	1	no
113-689B-3H-3	Stylatractus neptunus	8	2	6	no
113-689B-3H-3	Stylatractus santaennae	17	7	10	no
113-689B-3H-3	Stylatractus universus	93	36	57	no
113-689B-3H-3	Stylochlamydium venustum	56	27	29	no
113-689B-3H-3	Stylodictya validispina	110	33	77	no
113-689B-3H-3	Stylosphaera angelina	13	5	8	no
113-689B-3H-3	Tetraplecta sp16	2	0	2	no
113-689B-3H-3	Tetrapyle octacantha	28	20	8	no
113-689B-3H-3	Thecosphaera inermis	2	0	2	no
113-689B-3H-3	Thecosphaera japonica	108	36	72	no
113-689B-3H-3	Thecosphaera pseudojaponica	2	2	0	no
113-689B-3H-3	Triceraspyris coronata	206	67	139	no
113-689B-3H-3	Triceraspyris spL	7	6	1	no
113-689B-3H-3	Trisulcus nanus	3	3	0	no
113-689B-3H-3	Undetermined	5	4	1	no
113-689B-3H-3	Velicucullus altus	8	0	8	no
113-689B-3H-4	Acanthodesmia micropora	1	1	0	no
113-689B-3H-4	Acrosphaera australis	31	11	20	no
113-689B-3H-4	Acrosphaera labrata	37	20	17	no
113-689B-3H-4	Acrosphaera mercurius	10	2	8	no
113-689B-3H-4	Acrosphaera murrayana	6	4	2	no
113-689B-3H-4	Actinomma leptoderma	10	1	9	no
113-689B-3H-4	Actinomma popofskii	2	2	0	no
113-689B-3H-4	Actinomma livae	2	0	2	no
113-689B-3H-4	Actinommid spC	1	1	0	no
113-689B-3H-4	Amphimelissa hibernifortuna	1	1	0	no
113-689B-3H-4	Amphiplecta acrostoma	1	1	0	no
113-689B-3H-4	Antarctissa cylindrica	1060	424	636	yes
113-689B-3H-4	Antarctissa deflandrei	3	0	3	no
113-689B-3H-4	Antarctissa denticulata	1260	504	756	yes
113-689B-3H-4	Antarctissa robusta	5	1	4	no
113-689B-3H-4	Antarctissa ballista	470	188	282	yes
113-689B-3H-4	Antarctissa strelkovi	1110	444	666	yes
113-689B-3H-4	Arachnocorallium sp17	2	1	1	no
113-689B-3H-4	Arachnocorallium sp5	2	1	1	no
113-689B-3H-4	Arachnocorys circumtexta	1	1	0	no
113-689B-3H-4	Artostrobus annulatus	114	51	63	no
113-689B-3H-4	Artostrobus joergenseni	11	5	6	no
113-689B-3H-4	Botryopyle cribosa	4	1	3	no
113-689B-3H-4	Botryopyle dionisii	1	1	0	no
113-689B-3H-4	Botryostrobus auritus/australis	58	19	39	no
113-689B-3H-4	Cannobotryid spB	1	0	1	no
113-689B-3H-4	Carposphaera annikae	3	1	2	no
113-689B-3H-4	Cenosphaera cristata	4	3	1	no
113-689B-3H-4	Ceratocyrtis cantharoides	1	0	1	no
113-689B-3H-4	Ceratocyrtis histricosa	3	2	1	no
113-689B-3H-4	Ceratocyrtis mashae	8	2	6	no
113-689B-3H-4	Challengeron lingi	1	1	0	no
113-689B-3H-4	Circodiscus ellipticus	1	1	0	no
113-689B-3H-4	Cladoscenium ancoratum	3	1	2	no
113-689B-3H-4	Clathrocorys spJ	2	1	1	no
113-689B-3H-4	Clathromitra pentacantha	1	0	1	no
113-689B-3H-4	Collosphaerid reynoldsi	1	0	1	no
113-689B-3H-4	Collosphaerid spD	2	1	1	no
113-689B-3H-4	Cornutella clathrata	2	0	2	no
113-689B-3H-4	Cornutella profunda	108	44	64	no
113-689B-3H-4	Corythomelissa horrida	6	1	5	no
113-689B-3H-4	Cubotholus spp	1	1	0	no
113-689B-3H-4	Cycladophora bicornis	31	8	23	no
113-689B-3H-4	Cycladophora cosma	2	2	0	no
113-689B-3H-4	Cycladophora pliocenica	60	29	31	no
113-689B-3H-4	Cycladophora spongothorax	7	2	5	no
113-689B-3H-4	Cyrtolagena laguncula	3	1	2	no
113-689B-3H-4	Cystophormis brevispina	3	3	0	no
113-689B-3H-4	Dendrospyris haysi	75	29	46	no
113-689B-3H-4	Dendrospyris sakaii	2	1	1	no
113-689B-3H-4	Dictyophimus macropterus	1	1	0	no
113-689B-3H-4	Dictyophimus planctonis	57	39	18	no
113-689B-3H-4	Druppatractus hastatus	36	21	15	no
113-689B-3H-4	Druppatractus irregularis	8	4	4	no
113-689B-3H-4	Drymyomma elegans	1	1	0	no
113-689B-3H-4	Echinomma sphaerechinus	3	1	2	no
113-689B-3H-4	Enneaphormis rotula	1	0	1	no
113-689B-3H-4	Orodapis ferrealuma	17	6	11	no
113-689B-3H-4	Eucyrtidium calvertense	24	9	15	no
113-689B-3H-4	Eucyrtidium inflatum	2	0	2	no
113-689B-3H-4	Eucyrtidium pseudoinflatum	2	0	2	no
113-689B-3H-4	Euscenarium joergenseni	3	3	0	no
113-689B-3H-4	Gondwanaria cylindrica	3	0	3	no
113-689B-3H-4	Gondwanaria deflandrei	2	1	1	no
113-689B-3H-4	Haeckeliella inconstans	1	1	0	no
113-689B-3H-4	Haliometta miocenica	1	1	0	no
113-689B-3H-4	Heliodiscus asteriscus	3	1	2	no
113-689B-3H-4	Helisoma dispar	5	3	2	no
113-689B-3H-4	Helotholus haysi	6	3	3	no
113-689B-3H-4	Helotholus praevema	780	312	468	yes
113-689B-3H-4	Hexacontium enthacanthum	8	1	7	no
113-689B-3H-4	Hexacontium pachydermum	4	3	1	no
113-689B-3H-4	Hexalonche aristarchi	1	0	1	no
113-689B-3H-4	Hexalonche philosophica	5	5	0	no
113-689B-3H-4	Hexapyle dodecantha	40	19	21	no
113-689B-3H-4	Lampromitra dodecaster	1	1	0	no
113-689B-3H-4	Larcopyle augusti	2	0	2	no
113-689B-3H-4	Larcopyle buetschlii	21	10	11	no
113-689B-3H-4	Larcopyle hayesi	16	6	10	no
113-689B-3H-4	Larcopyle labyrinthusa	30	14	16	no
113-689B-3H-4	Larcopyle peregrinator	3	0	3	no
113-689B-3H-4	Larcopyle polyacantha amplissima	2	1	1	no
113-689B-3H-4	Larcopyle polyacantha polyacantha	58	31	27	no
113-689B-3H-4	Larcopyle polyacantha titan	25	10	15	no
113-689B-3H-4	Larcopyle pylomaticus	55	32	23	no
113-689B-3H-4	Larcopyle titan	12	5	7	no
113-689B-3H-4	Larcopyle weddelium	72	38	34	no
113-689B-3H-4	Liosphaera antarctica	1	0	1	no
113-689B-3H-4	Litharachnium tentorium	1	0	1	no
113-689B-3H-4	Lithelius minor	5	2	3	no
113-689B-3H-4	Lithelius nautiloides	9	6	3	no
113-689B-3H-4	Lithomelissa sp11	1	1	0	no
113-689B-3H-4	Lithomelissa stigi	3	2	1	no
113-689B-3H-4	Lithomelissa tricornis	28	18	10	no
113-689B-3H-4	Lonchosphaera spicata	4	2	2	no
113-689B-3H-4	Lophophaena clevei	1	1	0	no
113-689B-3H-4	Lophophaena undulatum	1	0	1	no
113-689B-3H-4	Lychnocanium conica	3	2	1	no
113-689B-3H-4	Lychnocanium grande	214	85	129	no
113-689B-3H-4	Syscioscenium wabisabi	1	1	0	no
113-689B-3H-4	Pentapylonium implicatum	1	0	1	no
113-689B-3H-4	Perichlamydium praetextum	6	4	2	no
113-689B-3H-4	Peridium longispinum	4	4	0	no
113-689B-3H-4	Peripyramis circumtexta	2	1	1	no
113-689B-3H-4	Phaeodarian spA	2	0	2	no
113-689B-3H-4	Phorticium clevei	139	66	73	no
113-689B-3H-4	Botryopera gibbera	1	1	0	no
113-689B-3H-4	Plagoniid sp4	1	1	0	no
113-689B-3H-4	Plagoniid sp7	5	1	4	no
113-689B-3H-4	Plagoniid spB	2	1	1	no
113-689B-3H-4	Plannapus mauricei	1	0	1	no
113-689B-3H-4	Plectopyramis dodecumma	1	1	0	no
113-689B-3H-4	Protoscenium sp18	2	1	1	no
113-689B-3H-4	Prunoid spD	2	0	2	no
113-689B-3H-4	Pseudocubus obeliscus	4	1	3	no
113-689B-3H-4	Pseudodictyophimus gracillipes	27	8	19	no
113-689B-3H-4	Pseudodictyophimus spY	6	3	3	no
113-689B-3H-4	Pseudodictyophimus tanythorax	8	6	2	no
113-689B-3H-4	Pterocanium korotnevi	3	1	2	no
113-689B-3H-4	Rhizoplegma boreale	1	0	1	no
113-689B-3H-4	Saccospyris antarctica	10	7	3	no
113-689B-3H-4	Saccospyris praeantarctica	3	1	2	no
113-689B-3H-4	Siphocampe arachnea	40	15	25	no
113-689B-3H-4	Siphonosphaera vesuvius	7	2	5	no
113-689B-3H-4	Sphaeropyle antarctica	1	1	0	no
113-689B-3H-4	Sphaeropyle robusta	34	13	21	no
113-689B-3H-4	Spongodiscid spA	1	1	0	no
113-689B-3H-4	Spongodiscid spH	2	2	0	no
113-689B-3H-4	Spongodiscus craticulatus	212	81	131	no
113-689B-3H-4	Spongodiscus osculosus	189	81	108	no
113-689B-3H-4	Spongoplegma variabile	15	5	10	no
113-689B-3H-4	Spongotrochus glacialis	8	3	5	no
113-689B-3H-4	Spumellarian spB	1	1	0	no
113-689B-3H-4	Stauroxiphos communis	3	2	1	no
113-689B-3H-4	Stichocorys peregrina	1	1	0	no
113-689B-3H-4	Stylatractus neptunus	5	2	3	no
113-689B-3H-4	Stylatractus santaennae	23	10	13	no
113-689B-3H-4	Stylatractus universus	33	5	28	no
113-689B-3H-4	Stylochlamydium venustum	23	13	10	no
113-689B-3H-4	Stylodictya aculeata	2	0	2	no
113-689B-3H-4	Stylodictya ocellata	1	1	0	no
113-689B-3H-4	Stylodictya validispina	76	32	44	no
113-689B-3H-4	Stylosphaera angelina	71	24	47	no
113-689B-3H-4	Tetraplecta sp16	1	0	1	no
113-689B-3H-4	Tetrapyle octacantha	59	33	26	no
113-689B-3H-4	Thecosphaera inermis	2	1	1	no
113-689B-3H-4	Thecosphaera japonica	62	24	38	no
113-689B-3H-4	Triceraspyris coronata	7	6	1	no
113-689B-3H-4	Triospyrid spP	1	1	0	no
113-689B-3H-4	Trisulcus nanus	3	1	2	no
113-689B-3H-4	Undetermined	7	2	5	no
113-689B-3H-4	Velicucullus altus	31	10	21	no
113-689B-3H-5	Acanthodesmia micropora	3	1	2	no
113-689B-3H-5	Acanthosphaera insignis	1	1	0	no
113-689B-3H-5	Acrosphaera australis	649	130	519	yes
113-689B-3H-5	Acrosphaera labrata	2	2	0	no
113-689B-3H-5	Acrosphaera mercurius	5	0	5	no
113-689B-3H-5	Acrosphaera murrayana	13	5	8	no
113-689B-3H-5	Acrosphaera cuniculiauris	3	1	2	no
113-689B-3H-5	Actinomma delicatulum	4	2	2	no
113-689B-3H-5	Actinomma leptoderma	4	1	3	no
113-689B-3H-5	Actinomma popofskii	45	14	31	no
113-689B-3H-5	Actinomma livae	3	1	2	no
113-689B-3H-5	Actinomma nigriniae	4	1	3	no
113-689B-3H-5	Actinommid spM	257	56	201	no
113-689B-3H-5	Amphimelissa hibernifortuna	6	0	6	no
113-689B-3H-5	Amphiplecta acrostoma	1	1	0	no
113-689B-3H-5	Antarctissa cylindrica	18	6	12	no
113-689B-3H-5	Antarctissa deflandrei	939	188	751	yes
113-689B-3H-5	Antarctissa denticulata	12	7	5	no
113-689B-3H-5	Antarctissa robusta	94	43	51	no
113-689B-3H-5	Antarctissa ballista	182	48	134	no
113-689B-3H-5	Antarctissa strelkovi	111	39	72	no
113-689B-3H-5	Arachnocorallium sp17	3	1	2	no
113-689B-3H-5	Arachnocorallium sp5	4	1	3	no
113-689B-3H-5	Archipilium macropus	2	0	2	no
113-689B-3H-5	Artostrobus annulatus	79	15	64	no
113-689B-3H-5	Botryopera sp10	1	0	1	no
113-689B-3H-5	Botryopyle cribosa	34	8	26	no
113-689B-3H-5	Botryopyle spA	7	2	5	no
113-689B-3H-5	Botryostrobus auritus/australis	18	1	17	no
113-689B-3H-5	Carpocanium pulchrum	1	0	1	no
113-689B-3H-5	Carposphaera annikae	6	0	6	no
113-689B-3H-5	Cenosphaera cristata	3	2	1	no
113-689B-3H-5	Ceratocyrtis cantharoides	8	1	7	no
113-689B-3H-5	Ceratocyrtis histricosa	2	1	1	no
113-689B-3H-5	Ceratocyrtis mashae	3	1	2	no
113-689B-3H-5	Cladococcus spI	1	0	1	no
113-689B-3H-5	Chitascenium cranites	7	0	7	no
113-689B-3H-5	Clathrocorys spJ	1	0	1	no
113-689B-3H-5	Collosphaerid reynoldsi	2	1	1	no
113-689B-3H-5	Cornutella clathrata	69	15	54	no
113-689B-3H-5	Cornutella profunda	519	104	415	yes
113-689B-3H-5	Corythomelissa horrida	4	0	4	no
113-689B-3H-5	Cubotholus spp	1	1	0	no
113-689B-3H-5	Cycladophora bicornis	108	28	80	no
113-689B-3H-5	Cycladophora cosma	37	10	27	no
113-689B-3H-5	Cycladophora pliocenica	6	0	6	no
113-689B-3H-5	Cycladophora rosetta	1	0	1	no
113-689B-3H-5	Cycladophora spongothorax	105	26	79	no
113-689B-3H-5	Cyrtolagena laguncula	2	0	2	no
113-689B-3H-5	Cystophormis brevispina	1	1	0	no
113-689B-3H-5	Cystophormis ob	2	1	1	no
113-689B-3H-5	Dendrospyris haysi	839	168	671	yes
113-689B-3H-5	Dendrospyris rhodospyroides	2	0	2	no
113-689B-3H-5	Desmospyris spongiosa	6	6	0	no
113-689B-3H-5	Dictyophimus archipilium	9	6	3	no
113-689B-3H-5	Dictyophimus crisiae	1	0	1	no
113-689B-3H-5	Dictyophimus macropterus	16	5	11	no
113-689B-3H-5	Dictyophimus planctonis	42	12	30	no
113-689B-3H-5	Dimelissa thoracites	7	0	7	no
113-689B-3H-5	Druppatractus hastatus	6	3	3	no
113-689B-3H-5	Druppatractus irregularis	35	5	30	no
113-689B-3H-5	Drymyomma elegans	14	8	6	no
113-689B-3H-5	Orodapis ferrealuma	10	4	6	no
113-689B-3H-5	Eucyrtidium acuminatum	1	0	1	no
113-689B-3H-5	Eucyrtidium calvertense	26	4	22	no
113-689B-3H-5	Eucyrtidium cienkowskii	7	2	5	no
113-689B-3H-5	Eucyrtidium inflatum	17	1	16	no
113-689B-3H-5	Eucyrtidium pseudoinflatum	19	4	15	no
113-689B-3H-5	Euscenarium joergenseni	13	4	9	no
113-689B-3H-5	Excentrodiscus japonicus	2	0	2	no
113-689B-3H-5	Gondwanaria cylindrica	3	0	3	no
113-689B-3H-5	Gondwanaria deflandrei	6	0	6	no
113-689B-3H-5	Haliometta miocenica	4	1	3	no
113-689B-3H-5	Heliodiscus asteriscus	10	2	8	no
113-689B-3H-5	Helisoma dispar	6	2	4	no
113-689B-3H-5	Helotholus haysi	3	0	3	no
113-689B-3H-5	Hexacontium enthacanthum	6	5	1	no
113-689B-3H-5	Hexacontium pachydermum	6	5	1	no
113-689B-3H-5	Hexalonche philosophica	17	3	14	no
113-689B-3H-5	Hexapyle dodecantha	34	12	22	no
113-689B-3H-5	Lampromitra dodecaster	1	1	0	no
113-689B-3H-5	Larcopyle augusti	8	3	5	no
113-689B-3H-5	Larcopyle buetschlii	19	8	11	no
113-689B-3H-5	Larcopyle eccentricum	3	1	2	no
113-689B-3H-5	Larcopyle hayesi	291	63	228	no
113-689B-3H-5	Larcopyle labyrinthusa	76	49	27	no
113-689B-3H-5	Larcopyle peregrinator	97	21	76	no
113-689B-3H-5	Larcopyle polyacantha amplissima	11	1	10	no
113-689B-3H-5	Larcopyle polyacantha polyacantha	155	52	103	no
113-689B-3H-5	Larcopyle polyacantha titan	9	4	5	no
113-689B-3H-5	Larcopyle pylomaticus	2	2	0	no
113-689B-3H-5	Larcopyle titan	48	11	37	no
113-689B-3H-5	Larcopyle weddelium	1	1	0	no
113-689B-3H-5	Larcospira moschkovskii	10	1	9	no
113-689B-3H-5	Litharachnium tentorium	4	1	3	no
113-689B-3H-5	Lithelius nautiloides	2	1	1	no
113-689B-3H-5	Lithomelissa brevispicula	1	0	1	no
113-689B-3H-5	Lithomelissa stigi	50	26	24	no
113-689B-3H-5	Lithomelissa tricornis	5	3	2	no
113-689B-3H-5	Lonchosphaera spicata	5	0	5	no
113-689B-3H-5	Lophophaena macrencephala	6	1	5	no
113-689B-3H-5	Lophophaena simplex	5	5	0	no
113-689B-3H-5	Lophophaena spU	2	0	2	no
113-689B-3H-5	Lophospyris pentagona	5	3	2	no
113-689B-3H-5	Lychnocanium conica	1	1	0	no
113-689B-3H-5	Lychnocanium grande	7	5	2	no
113-689B-3H-5	Syscioscenium wabisabi	3	0	3	no
113-689B-3H-5	Neosemantis distephanus	1	0	1	no
113-689B-3H-5	Octopyle stenozona	1	1	0	no
113-689B-3H-5	Oroscena carolae	1	0	1	no
113-689B-3H-5	Pentapylonium implicatum	1	0	1	no
113-689B-3H-5	Perichlamydium praetextum	6	3	3	no
113-689B-3H-5	Peridium longispinum	1	0	1	no
113-689B-3H-5	Peripyramis circumtexta	13	3	10	no
113-689B-3H-5	Phormacantha hystrix	1	0	1	no
113-689B-3H-5	Phormostichoartus fistula	7	1	6	no
113-689B-3H-5	Phormostichoartus pitomorphus	4	1	3	no
113-689B-3H-5	Phorticium clevei	28	9	19	no
113-689B-3H-5	Botryopera gibbera	1	0	1	no
113-689B-3H-5	Lithomelissa vespa	12	0	12	no
113-689B-3H-5	Plagoniid spC	1	1	0	no
113-689B-3H-5	Plannapus mauricei	6	0	6	no
113-689B-3H-5	Plectagonidium deflandrei	1	0	1	no
113-689B-3H-5	Plectopyramis dodecumma	3	1	2	no
113-689B-3H-5	Prunoid spD	5	4	1	no
113-689B-3H-5	Pseudodictyophimus gracillipes	96	26	70	no
113-689B-3H-5	Pseudodictyophimus platycephalus	2	1	1	no
113-689B-3H-5	Pseudodictyophimus spY	2	1	1	no
113-689B-3H-5	Pseudodictyophimus tanythorax	70	13	57	no
113-689B-3H-5	Saccospyris antarctica	16	6	10	no
113-689B-3H-5	Saccospyris praeantarctica	19	6	13	no
113-689B-3H-5	Schizodiscus favus	1	0	1	no
113-689B-3H-5	Siphocampe arachnea	62	20	42	no
113-689B-3H-5	Siphonosphaera magnisphaera	2	0	2	no
113-689B-3H-5	Siphonosphaera vesuvius	84	25	59	no
113-689B-3H-5	Siphostichoartus jahnae	3	0	3	no
113-689B-3H-5	Sphaeropyle antarctica	2	1	1	no
113-689B-3H-5	Sphaeropyle robusta	70	9	61	no
113-689B-3H-5	Spongodiscus craticulatus	172	43	129	no
113-689B-3H-5	Spongodiscus osculosus	183	40	143	no
113-689B-3H-5	Spongoplegma variabile	47	13	34	no
113-689B-3H-5	Spongotrochus glacialis	12	4	8	no
113-689B-3H-5	Stylatractus neptunus	27	9	18	no
113-689B-3H-5	Stylatractus santaennae	80	25	55	no
113-689B-3H-5	Stylatractus universus	564	113	451	yes
113-689B-3H-5	Stylochlamydium venustum	2	1	1	no
113-689B-3H-5	Stylodictya aculeata	1	0	1	no
113-689B-3H-5	Stylodictya ocellata	1	1	0	no
113-689B-3H-5	Stylodictya validispina	174	59	115	no
113-689B-3H-5	Stylosphaera angelina	12	1	11	no
113-689B-3H-5	Tetrapyle octacantha	52	23	29	no
113-689B-3H-5	Thecosphaera inermis	2	0	2	no
113-689B-3H-5	Thecosphaera japonica	119	51	68	no
113-689B-3H-5	Thecosphaera miocenica	2	1	1	no
113-689B-3H-5	Theocorys redondoensis	4	1	3	no
113-689B-3H-5	Tholospyris gephyristes	1	1	0	no
113-689B-3H-5	Tripophaenoscenium laimingi	2	0	2	no
113-689B-3H-5	Trisulcus nanus	3	0	3	no
113-689B-3H-5	Undetermined	15	5	10	no
113-689B-3H-5	Velicucullus altus	28	3	25	no
113-689B-3H-5	Velicucullus oddgurneri	1	0	1	no
113-689B-3H-6	Acrosphaera australis	311	56	255	yes
113-689B-3H-6	Acrosphaera labrata	1	0	1	no
113-689B-3H-6	Acrosphaera mercurius	1	0	1	no
113-689B-3H-6	Acrosphaera murrayana	66	24	42	no
113-689B-3H-6	Actinomma delicatulum	2	1	1	no
113-689B-3H-6	Actinomma popofskii	5	0	5	no
113-689B-3H-6	Actinomma nigriniae	37	8	29	no
113-689B-3H-6	Actinommid spC	11	0	11	no
113-689B-3H-6	Actinommid spM	105	19	86	no
113-689B-3H-6	Amphimelissa spO	3	1	2	no
113-689B-3H-6	Anomalocantha dentata	1	0	1	no
113-689B-3H-6	Antarctissa deflandrei	27	11	16	no
113-689B-3H-6	Antarctissa robusta	261	47	214	yes
113-689B-3H-6	Antarctissa ballista	13	3	10	no
113-689B-3H-6	Antarctissa strelkovi	361	65	296	yes
113-689B-3H-6	Arachnocorallium sp17	4	1	3	no
113-689B-3H-6	Arachnocorallium sp5	1	0	1	no
113-689B-3H-6	Archipilium macropus	2	0	2	no
113-689B-3H-6	Archipilium orthopterum	1	0	1	no
113-689B-3H-6	Artostrobus annulatus	136	28	108	no
113-689B-3H-6	Artostrobus joergenseni	15	4	11	no
113-689B-3H-6	Artostrobus quadriporus	1	0	1	no
113-689B-3H-6	Artostrobus spB	5	3	2	no
113-689B-3H-6	Artostrobus semazen	10	2	8	no
113-689B-3H-6	Botryopyle cribosa	10	1	9	no
113-689B-3H-6	Botryopyle dionisii	3	0	3	no
113-689B-3H-6	Botryopyle spA	1	0	1	no
113-689B-3H-6	Botryostrobus auritus/australis	40	5	35	no
113-689B-3H-6	Cannobotryid spB	2	0	2	no
113-689B-3H-6	Carposphaera annikae	18	0	18	no
113-689B-3H-6	Carposphaera subbotinae	1	1	0	no
113-689B-3H-6	Cenosphaera cristata	10	1	9	no
113-689B-3H-6	Ceratocyrtis cantharoides	10	2	8	no
113-689B-3H-6	Ceratocyrtis histricosa	3	1	2	no
113-689B-3H-6	Ceratocyrtis mashae	10	3	7	no
113-689B-3H-6	Ceratocyrtis dolvenianus	1	1	0	no
113-689B-3H-6	Ceratocyrtis morawanensis	2	0	2	no
113-689B-3H-6	Cladoscenium ancoratum	3	0	3	no
113-689B-3H-6	Cladoscenium groupN	1	0	1	no
113-689B-3H-6	Clathrocorys spJ	1	0	1	no
113-689B-3H-6	Collosphaerid reynoldsi	4	2	2	no
113-689B-3H-6	Cornutella clathrata	26	6	20	no
113-689B-3H-6	Cornutella profunda	616	111	505	yes
113-689B-3H-6	Corythomelissa horrida	9	2	7	no
113-689B-3H-6	Cubotholus spp	2	0	2	no
113-689B-3H-6	Cycladophora bicornis	49	12	37	no
113-689B-3H-6	Cycladophora cosma	55	9	46	no
113-689B-3H-6	Cycladophora pliocenica	2	0	2	no
113-689B-3H-6	Cycladophora spongothorax	186	25	161	no
113-689B-3H-6	Cystophormis brevispina	8	2	6	no
113-689B-3H-6	Dendrospyris haysi	178	32	146	yes
113-689B-3H-6	Dendrospyris rhodospyroides	461	83	378	yes
113-689B-3H-6	Dictyophimus crisiae	1	0	1	no
113-689B-3H-6	Dictyophimus macropterus	27	2	25	no
113-689B-3H-6	Dictyophimus planctonis	61	12	49	no
113-689B-3H-6	Dictyophimus splendens	2	0	2	no
113-689B-3H-6	Dimelissa thoracites	14	1	13	no
113-689B-3H-6	Druppatractus hastatus	14	7	7	no
113-689B-3H-6	Druppatractus irregularis	9	4	5	no
113-689B-3H-6	Echinomma sphaerechinus	2	0	2	no
113-689B-3H-6	Orodapis ferrealuma	9	2	7	no
113-689B-3H-6	Eucyrtidium acuminatum	12	3	9	no
113-689B-3H-6	Eucyrtidium calvertense	7	4	3	no
113-689B-3H-6	Eucyrtidium inflatum	6	1	5	no
113-689B-3H-6	Eucyrtidium pseudoinflatum	4	0	4	no
113-689B-3H-6	Eucyrtidium teuscheri	2	0	2	no
113-689B-3H-6	Euscenarium joergenseni	3	0	3	no
113-689B-3H-6	Excentrodiscus japonicus	1	0	1	no
113-689B-3H-6	Gondwanaria campanulaeformis	4	0	4	no
113-689B-3H-6	Gondwanaria cylindrica	1	1	0	no
113-689B-3H-6	Haeckeliella inconstans	1	0	1	no
113-689B-3H-6	Haliometta miocenica	21	5	16	no
113-689B-3H-6	Helisoma dispar	2	0	2	no
113-689B-3H-6	Hexacontium enthacanthum	1	0	1	no
113-689B-3H-6	Hexacontium pachydermum	1	0	1	no
113-689B-3H-6	Hexalonche philosophica	4	3	1	no
113-689B-3H-6	Hexapyle dodecantha	200	36	164	yes
113-689B-3H-6	Joergensenium appolo	1	0	1	no
113-689B-3H-6	Lampromitra dodecaster	2	0	2	no
113-689B-3H-6	Larcopyle augusti	39	7	32	no
113-689B-3H-6	Larcopyle buetschlii	3	3	0	no
113-689B-3H-6	Larcopyle eccentricum	3	3	0	no
113-689B-3H-6	Larcopyle hayesi	194	35	159	yes
113-689B-3H-6	Larcopyle labyrinthusa	33	9	24	no
113-689B-3H-6	Larcopyle nebulum	6	2	4	no
113-689B-3H-6	Larcopyle peregrinator	6	0	6	no
113-689B-3H-6	Larcopyle polyacantha amplissima	56	5	51	no
113-689B-3H-6	Larcopyle polyacantha polyacantha	316	57	259	yes
113-689B-3H-6	Larcopyle pylomaticus	13	3	10	no
113-689B-3H-6	Larcopyle titan	12	3	9	no
113-689B-3H-6	Larcopyle weddelium	10	7	3	no
113-689B-3H-6	Larcospira quadrangula	1	1	0	no
113-689B-3H-6	Liosphaera antarctica	2	0	2	no
113-689B-3H-6	Litharachnium tentorium	4	2	2	no
113-689B-3H-6	Lithomelissa brevispicula	2	1	1	no
113-689B-3H-6	Lithomelissa ehrenbergi	1	1	0	no
113-689B-3H-6	Lithomelissa stigi	16	2	14	no
113-689B-3H-6	Lithomelissa tricornis	7	1	6	no
113-689B-3H-6	Lonchosphaera spH	1	1	0	no
113-689B-3H-6	Lophophaena macrencephala	22	3	19	no
113-689B-3H-6	Lophophaena simplex	4	0	4	no
113-689B-3H-6	Lophophaena spU	3	0	3	no
113-689B-3H-6	Lophophaena thaumasia	1	0	1	no
113-689B-3H-6	Syscioscenium wabisabi	5	0	5	no
113-689B-3H-6	Oroscena carolae	1	1	0	no
113-689B-3H-6	Pentapylonium implicatum	1	0	1	no
113-689B-3H-6	Perichlamydium praetextum	10	4	6	no
113-689B-3H-6	Peridium longispinum	30	9	21	no
113-689B-3H-6	Peripyramis circumtexta	6	0	6	no
113-689B-3H-6	Phaeodarian spB	1	0	1	no
113-689B-3H-6	Phormostichoartus fistula	1	0	1	no
113-689B-3H-6	Phorticium clevei	261	47	214	yes
113-689B-3H-6	Botryopera gibbera	24	4	20	no
113-689B-3H-6	Lithomelissa vespa	6	2	4	no
113-689B-3H-6	Plagoniid spC	2	1	1	no
113-689B-3H-6	Plannapus papillosus	5	1	4	no
113-689B-3H-6	Plannapus mauricei	7	1	6	no
113-689B-3H-6	Plectopyramis dodecumma	4	0	4	no
113-689B-3H-6	Prunoid spD	13	2	11	no
113-689B-3H-6	Pseudodictyophimus gracillipes	38	13	25	no
113-689B-3H-6	Pseudodictyophimus platycephalus	3	0	3	no
113-689B-3H-6	Pseudodictyophimus spY	3	0	3	no
113-689B-3H-6	Pseudodictyophimus tanythorax	35	4	31	no
113-689B-3H-6	Pterocanium charybdeum trilobum	3	2	1	no
113-689B-3H-6	Pterocanium korotnevi	2	0	2	no
113-689B-3H-6	Pterocanium praetextum eucolpium	28	7	21	no
113-689B-3H-6	Saccospyris antarctica	12	11	1	no
113-689B-3H-6	Saccospyris praeantarctica	183	33	150	yes
113-689B-3H-6	Saturnalis circularis	2	0	2	no
113-689B-3H-6	Sethoconus tabulatus	3	1	2	no
113-689B-3H-6	Siphocampe arachnea	119	29	90	no
113-689B-3H-6	Siphonosphaera magnisphaera	19	5	14	no
113-689B-3H-6	Siphonosphaera vesuvius	4	1	3	no
113-689B-3H-6	Sphaeropyle robusta	22	2	20	no
113-689B-3H-6	Spirocyrtis hollisi	1	1	0	no
113-689B-3H-6	Spongodiscid groupG	1	0	1	no
113-689B-3H-6	Spongodiscid spA	1	1	0	no
113-689B-3H-6	Spongodiscid spH	8	5	3	no
113-689B-3H-6	Spongodiscus craticulatus	422	76	346	yes
113-689B-3H-6	Spongodiscus osculosus	62	15	47	no
113-689B-3H-6	Spongoplegma variabile	32	8	24	no
113-689B-3H-6	Spongotrochus glacialis	2	0	2	no
113-689B-3H-6	Stylatractus neptunus	9	1	8	no
113-689B-3H-6	Stylatractus santaennae	9	4	5	no
113-689B-3H-6	Stylatractus universus	394	71	323	yes
113-689B-3H-6	Stylodictya aculeata	3	1	2	no
113-689B-3H-6	Stylodictya validispina	137	28	109	no
113-689B-3H-6	Stylosphaera angelina	19	6	13	no
113-689B-3H-6	Tetraplecta sp16	1	1	0	no
113-689B-3H-6	Tetrapyle octacantha	244	44	200	yes
113-689B-3H-6	Thecosphaera inermis	4	1	3	no
113-689B-3H-6	Thecosphaera japonica	178	32	146	yes
113-689B-3H-6	Tholospyris gephyristes	1	0	1	no
113-689B-3H-6	Triceraspyris coronata	1	0	1	no
113-689B-3H-6	Triospyrid spP	1	0	1	no
113-689B-3H-6	Tripophaenoscenium laimingi	1	0	1	no
113-689B-3H-6	Undetermined	12	2	10	no
113-689B-3H-6	Velicucullus altus	11	4	7	no
113-689B-4H-2	Acanthodesmia micropora	5	1	4	no
113-689B-4H-2	Acrosphaera australis	15	2	13	no
113-689B-4H-2	Acrosphaera mercurius	1	0	1	no
113-689B-4H-2	Acrosphaera murrayana	452	52	400	yes
113-689B-4H-2	Actinomma delicatulum	1	0	1	no
113-689B-4H-2	Actinomma leptoderma	2	0	2	no
113-689B-4H-2	Actinomma popofskii	2	0	2	no
113-689B-4H-2	Actinomma nigriniae	12	1	11	no
113-689B-4H-2	Actinommid spC	8	1	7	no
113-689B-4H-2	Actinommid spM	176	16	160	no
113-689B-4H-2	Amphimelissa spO	4	1	3	no
113-689B-4H-2	Amphymenium amphystylium	1	0	1	no
113-689B-4H-2	Antarctissa cylindrica	1	0	1	no
113-689B-4H-2	Antarctissa deflandrei	8	0	8	no
113-689B-4H-2	Antarctissa robusta	49	13	36	no
113-689B-4H-2	Antarctissa ballista	5	1	4	no
113-689B-4H-2	Antarctissa strelkovi	470	54	416	yes
113-689B-4H-2	Anthocyrtella callospima	1	0	1	no
113-689B-4H-2	Arachnocorallium sp17	25	0	25	no
113-689B-4H-2	Arachnocorallium sp5	5	2	3	no
113-689B-4H-2	Archipilium macropus	6	0	6	no
113-689B-4H-2	Artostrobus annulatus	409	47	362	yes
113-689B-4H-2	Artostrobus joergenseni	13	1	12	no
113-689B-4H-2	Artostrobus spB	8	0	8	no
113-689B-4H-2	Artostrobus semazen	13	1	12	no
113-689B-4H-2	Botryopera sp10	1	0	1	no
113-689B-4H-2	Botryopyle dionisii	5	0	5	no
113-689B-4H-2	Botryostrobus auritus/australis	37	8	29	no
113-689B-4H-2	Cannobotryid spB	2	0	2	no
113-689B-4H-2	Carposphaera annikae	15	3	12	no
113-689B-4H-2	Cenosphaera cristata	17	8	9	no
113-689B-4H-2	Ceratocyrtis cantharoides	11	4	7	no
113-689B-4H-2	Ceratocyrtis histricosa	8	3	5	no
113-689B-4H-2	Ceratocyrtis mashae	5	1	4	no
113-689B-4H-2	Ceratocyrtis dolvenianus	2	0	2	no
113-689B-4H-2	Ceratocyrtis morawanensis	17	0	17	no
113-689B-4H-2	Circodiscus ellipticus	2	0	2	no
113-689B-4H-2	Cladoscenium ancoratum	16	0	16	no
113-689B-4H-2	Cladoscenium groupN	7	4	3	no
113-689B-4H-2	Cladoscenium tricolpium	10	3	7	no
113-689B-4H-2	Clathrocanium coarctatum	1	0	1	no
113-689B-4H-2	Clathrocorys murrayi	1	0	1	no
113-689B-4H-2	Clathrocorys spJ	5	0	5	no
113-689B-4H-2	Clathromitra pentacantha	1	0	1	no
113-689B-4H-2	Collosphaerid reynoldsi	2	0	2	no
113-689B-4H-2	Cornutella clathrata	4	2	2	no
113-689B-4H-2	Cornutella profunda	461	53	408	yes
113-689B-4H-2	Corythomelissa horrida	6	0	6	no
113-689B-4H-2	Corythospyris jubata	7	0	7	no
113-689B-4H-2	Cubotholus spp	2	0	2	no
113-689B-4H-2	Cycladophora bicornis	86	15	71	no
113-689B-4H-2	Cycladophora cosma	136	13	123	no
113-689B-4H-2	Cycladophora spongothorax	244	28	216	yes
113-689B-4H-2	Cyrtolagena laguncula	20	1	19	no
113-689B-4H-2	Cystophormis brevispina	4	1	3	no
113-689B-4H-2	Cystophormis ob	8	1	7	no
113-689B-4H-2	Dendrospyris haysi	35	9	26	no
113-689B-4H-2	Dendrospyris rhodospyroides	470	54	416	yes
113-689B-4H-2	Dendrospyris sakaii	3	0	3	no
113-689B-4H-2	Dictyophimus crisiae	2	2	0	no
113-689B-4H-2	Dictyophimus macropterus	14	2	12	no
113-689B-4H-2	Dictyophimus planctonis	64	8	56	no
113-689B-4H-2	Dimelissa thoracites	11	2	9	no
113-689B-4H-2	Druppatractus hastatus	5	0	5	no
113-689B-4H-2	Druppatractus irregularis	10	0	10	no
113-689B-4H-2	Echinomma sphaerechinus	7	1	6	no
113-689B-4H-2	Enneaphormis rotula	2	0	2	no
113-689B-4H-2	Enneaphormis spI	1	0	1	no
113-689B-4H-2	Entactinarian spA	1	0	1	no
113-689B-4H-2	Orodapis ferrealuma	16	3	13	no
113-689B-4H-2	Eucyrtidium acuminatum	12	3	9	no
113-689B-4H-2	Eucyrtidium calvertense	4	1	3	no
113-689B-4H-2	Eucyrtidium inflatum	1	1	0	no
113-689B-4H-2	Eucyrtidium pseudoinflatum	13	0	13	no
113-689B-4H-2	Eucyrtidium teuscheri	3	1	2	no
113-689B-4H-2	Euscenarium joergenseni	10	2	8	no
113-689B-4H-2	Excentrodiscus japonicus	11	0	11	no
113-689B-4H-2	Gondwanaria cylindrica	6	1	5	no
113-689B-4H-2	Gondwanaria deflandrei	1	0	1	no
113-689B-4H-2	Haliomma macrodoras	4	0	4	no
113-689B-4H-2	Helisoma dispar	4	0	4	no
113-689B-4H-2	Hexacontium enthacanthum	31	7	24	no
113-689B-4H-2	Hexacontium pachydermum	2	1	1	no
113-689B-4H-2	Hexapyle dodecantha	43	16	27	no
113-689B-4H-2	Joergensenium appolo	2	0	2	no
113-689B-4H-2	Lampromitra dodecaster	1	0	1	no
113-689B-4H-2	Larcopyle augusti	61	11	50	no
113-689B-4H-2	Larcopyle buetschlii	4	3	1	no
113-689B-4H-2	Larcopyle hayesi	123	12	111	no
113-689B-4H-2	Larcopyle labyrinthusa	51	12	39	no
113-689B-4H-2	Larcopyle nebulum	4	2	2	no
113-689B-4H-2	Larcopyle peregrinator	26	3	23	no
113-689B-4H-2	Larcopyle polyacantha amplissima	374	43	331	yes
113-689B-4H-2	Larcopyle polyacantha polyacantha	138	15	123	no
113-689B-4H-2	Larcopyle polyacantha titan	1	1	0	no
113-689B-4H-2	Larcopyle pylomaticus	2	0	2	no
113-689B-4H-2	Larcopyle titan	6	2	4	no
113-689B-4H-2	Larcopyle weddelium	41	14	27	no
113-689B-4H-2	Litharachnium tentorium	2	0	2	no
113-689B-4H-2	Lithelius minor	1	0	1	no
113-689B-4H-2	Lithelius nautiloides	6	0	6	no
113-689B-4H-2	Lithomelissa brevispicula	4	0	4	no
113-689B-4H-2	Lithomelissa sp20	2	2	0	no
113-689B-4H-2	Lithomelissa stigi	44	6	38	no
113-689B-4H-2	Lithomelissa tricornis	10	0	10	no
113-689B-4H-2	Lonchosphaera spicata	6	0	6	no
113-689B-4H-2	Lophophaena clevei	6	0	6	no
113-689B-4H-2	Lophophaena macrencephala	18	1	17	no
113-689B-4H-2	Lophophaena simplex	8	1	7	no
113-689B-4H-2	Lophophaena spU	2	0	2	no
113-689B-4H-2	Lophospyris pentagona	8	2	6	no
113-689B-4H-2	Syscioscenium wabisabi	10	1	9	no
113-689B-4H-2	Neosemantis bjoerklundi mimicus	3	1	2	no
113-689B-4H-2	Neosemantis distephanus	1	0	1	no
113-689B-4H-2	Octopyle stenozona	7	1	6	no
113-689B-4H-2	Oroscena carolae	2	0	2	no
113-689B-4H-2	Perichlamydium praetextum	55	2	53	no
113-689B-4H-2	Peridium longispinum	26	4	22	no
113-689B-4H-2	Peripyramis circumtexta	6	2	4	no
113-689B-4H-2	Phaeodarian spB	1	0	1	no
113-689B-4H-2	Phorticium clevei	19	4	15	no
113-689B-4H-2	Plagoniid sp14	2	2	0	no
113-689B-4H-2	Botryopera gibbera	27	2	25	no
113-689B-4H-2	Lithomelissa vespa	4	1	3	no
113-689B-4H-2	Plagoniid sp7	2	0	2	no
113-689B-4H-2	Plagoniid spC	1	0	1	no
113-689B-4H-2	Plagoniid spP	1	0	1	no
113-689B-4H-2	Plagoniid spW	3	0	3	no
113-689B-4H-2	Plannapus papillosus	7	1	6	no
113-689B-4H-2	Plannapus hornibrooki	22	3	19	no
113-689B-4H-2	Plannapus mauricei	66	10	56	no
113-689B-4H-2	Plectacantha oikiskos	4	2	2	no
113-689B-4H-2	Plectagonidium deflandrei	1	0	1	no
113-689B-4H-2	Plectopyramis dodecumma	1	1	0	no
113-689B-4H-2	Prunoid spD	26	11	15	no
113-689B-4H-2	Pseudocubus obeliscus	1	0	1	no
113-689B-4H-2	Pseudodictyophimus gracillipes	60	11	49	no
113-689B-4H-2	Pseudodictyophimus platycephalus	6	1	5	no
113-689B-4H-2	Pseudodictyophimus spY	12	2	10	no
113-689B-4H-2	Pseudodictyophimus tanythorax	51	4	47	no
113-689B-4H-2	Pterocanium charybdeum trilobum	4	1	3	no
113-689B-4H-2	Saccospyris antarctica	8	5	3	no
113-689B-4H-2	Saccospyris praeantarctica	183	21	162	yes
113-689B-4H-2	Sethoconus tabulatus	5	2	3	no
113-689B-4H-2	Siphocampe arachnea	296	34	262	yes
113-689B-4H-2	Siphonosphaera magnisphaera	5	0	5	no
113-689B-4H-2	Siphostichoartus jahnae	3	1	2	no
113-689B-4H-2	Sphaeropyle robusta	17	0	17	no
113-689B-4H-2	Sphaerozoum punctatum	7	0	7	no
113-689B-4H-2	Spongodiscid spA	1	1	0	no
113-689B-4H-2	Spongodiscid spH	1	0	1	no
113-689B-4H-2	Spongodiscus craticulatus	68	10	58	no
113-689B-4H-2	Spongodiscus osculosus	12	0	12	no
113-689B-4H-2	Spongoplegma variabile	21	2	19	no
113-689B-4H-2	Spongotrochus glacialis	10	3	7	no
113-689B-4H-2	Spumellarian spB	1	0	1	no
113-689B-4H-2	Stauroxiphos communis	1	0	1	no
113-689B-4H-2	Stichocorys peregrina	4	0	4	no
113-689B-4H-2	Stylatractid groupA	2	1	1	no
113-689B-4H-2	Stylatractus neptunus	21	6	15	no
113-689B-4H-2	Stylatractus santaennae	2	0	2	no
113-689B-4H-2	Stylatractus universus	235	27	208	yes
113-689B-4H-2	Stylochlamydium venustum	1	1	0	no
113-689B-4H-2	Stylodictya aculeata	4	1	3	no
113-689B-4H-2	Stylodictya ocellata	8	2	6	no
113-689B-4H-2	Stylodictya validispina	331	38	293	yes
113-689B-4H-2	Stylosphaera angelina	27	6	21	no
113-689B-4H-2	Tetraplecta pinigera	1	0	1	no
113-689B-4H-2	Tetraplecta sp16	10	0	10	no
113-689B-4H-2	Tetrapyle octacantha	191	22	169	yes
113-689B-4H-2	Thecosphaera japonica	200	23	177	yes
113-689B-4H-2	Thecosphaera pseudojaponica	4	3	1	no
113-689B-4H-2	Theocorys redondoensis	2	0	2	no
113-689B-4H-2	Thyrsocyrtis clausa	1	1	0	no
113-689B-4H-2	Triceraspyris coronata	14	2	12	no
113-689B-4H-2	Undetermined	10	4	6	no
113-689B-4H-2	Velicucullus altus	6	0	6	no
113-689B-4H-2	Velicucullus oddgurneri	1	0	1	no
113-689B-4H-4	Acanthodesmia micropora	3	2	1	no
113-689B-4H-4	Acanthosphaera insignis	1	0	1	no
113-689B-4H-4	Acrosphaera australis	1	1	0	no
113-689B-4H-4	Acrosphaera mercurius	15	6	9	no
113-689B-4H-4	Acrosphaera murrayana	471	157	314	yes
113-689B-4H-4	Actinomma popofskii	3	1	2	no
113-689B-4H-4	Actinomma nigriniae	19	2	17	no
113-689B-4H-4	Actinommid spC	27	12	15	no
113-689B-4H-4	Actinommid spM	215	26	189	no
113-689B-4H-4	Amphiplecta acrostoma	4	1	3	no
113-689B-4H-4	Antarctissa cylindrica	12	4	8	no
113-689B-4H-4	Antarctissa deflandrei	127	61	66	no
113-689B-4H-4	Antarctissa denticulata	7	3	4	no
113-689B-4H-4	Antarctissa robusta	166	73	93	no
113-689B-4H-4	Antarctissa ballista	5	4	1	no
113-689B-4H-4	Arachnocorallium calvata	8	7	1	no
113-689B-4H-4	Arachnocorallium sp17	54	31	23	no
113-689B-4H-4	Arachnocorallium sp5	107	27	80	no
113-689B-4H-4	Arachnosphaera dichotoma	1	1	0	no
113-689B-4H-4	Archipilium macropus	2	0	2	no
113-689B-4H-4	Artostrobus annulatus	263	106	157	no
113-689B-4H-4	Artostrobus joergenseni	22	18	4	no
113-689B-4H-4	Artostrobus semazen	3	0	3	no
113-689B-4H-4	Botryopyle cribosa	13	3	10	no
113-689B-4H-4	Botryostrobus auritus/australis	6	2	4	no
113-689B-4H-4	Cannobotryid spB	6	1	5	no
113-689B-4H-4	Carposphaera annikae	11	7	4	no
113-689B-4H-4	Cenosphaera cristata	5	2	3	no
113-689B-4H-4	Ceratocyrtis cantharoides	4	3	1	no
113-689B-4H-4	Ceratocyrtis histricosa	12	5	7	no
113-689B-4H-4	Ceratocyrtis mashae	1	0	1	no
113-689B-4H-4	Ceratocyrtis morawanensis	4	2	2	no
113-689B-4H-4	Circodiscus ellipticus	28	9	19	no
113-689B-4H-4	Cladoscenium ancoratum	20	13	7	no
113-689B-4H-4	Cladoscenium groupN	24	12	12	no
113-689B-4H-4	Cladoscenium tricolpium	13	8	5	no
113-689B-4H-4	Clathromitra spM	1	0	1	no
113-689B-4H-4	Collosphaerid reynoldsi	2	1	1	no
113-689B-4H-4	Collosphaerid spD	1	0	1	no
113-689B-4H-4	Cornutella clathrata	4	4	0	no
113-689B-4H-4	Cornutella profunda	328	92	236	no
113-689B-4H-4	Corythomelissa horrida	13	5	8	no
113-689B-4H-4	Corythospyris fiscella	1	1	0	no
113-689B-4H-4	Cubotholus spp	2	1	1	no
113-689B-4H-4	Cycladophora bicornis	135	66	69	no
113-689B-4H-4	Cycladophora cosma	65	22	43	no
113-689B-4H-4	Cycladophora pliocenica	4	3	1	no
113-689B-4H-4	Cycladophora spongothorax	191	71	120	no
113-689B-4H-4	Cyrtolagena laguncula	5	2	3	no
113-689B-4H-4	Dendrospyris haysi	83	29	54	no
113-689B-4H-4	Dendrospyris megalocephalis	4	4	0	no
113-689B-4H-4	Dendrospyris rhodospyroides	162	61	101	no
113-689B-4H-4	Dictyophimus archipilium	5	3	2	no
113-689B-4H-4	Dictyophimus hirundo	2	1	1	no
113-689B-4H-4	Dictyophimus macropterus	93	41	52	no
113-689B-4H-4	Dictyophimus planctonis	119	35	84	no
113-689B-4H-4	Dimelissa thoracites	30	13	17	no
113-689B-4H-4	Druppatractus hastatus	140	53	87	no
113-689B-4H-4	Druppatractus irregularis	7	1	6	no
113-689B-4H-4	Drymyomma elegans	4	2	2	no
113-689B-4H-4	Echinomma sphaerechinus	2	1	1	no
113-689B-4H-4	Enneaphormis rotula	8	5	3	no
113-689B-4H-4	Orodapis ferrealuma	8	4	4	no
113-689B-4H-4	Eucyrtidium acuminatum	2	0	2	no
113-689B-4H-4	Eucyrtidium cienkowskii	2	2	0	no
113-689B-4H-4	Eucyrtidium teuscheri	3	3	0	no
113-689B-4H-4	Euscenarium joergenseni	26	7	19	no
113-689B-4H-4	Excentrodiscus japonicus	6	4	2	no
113-689B-4H-4	Gondwanaria campanulaeformis	2	1	1	no
113-689B-4H-4	Gondwanaria cylindrica	2	0	2	no
113-689B-4H-4	Gondwanaria deflandrei	6	4	2	no
113-689B-4H-4	Haeckeliella inconstans	2	2	0	no
113-689B-4H-4	Heliodiscus asteriscus	2	0	2	no
113-689B-4H-4	Helisoma dispar	2	1	1	no
113-689B-4H-4	Hexacontium enthacanthum	27	18	9	no
113-689B-4H-4	Hexacontium pachydermum	7	2	5	no
113-689B-4H-4	Hexalonche philosophica	3	2	1	no
113-689B-4H-4	Hexapyle dodecantha	62	35	27	no
113-689B-4H-4	Lampromitra dodecaster	2	0	2	no
113-689B-4H-4	Larcopyle augusti	114	46	68	no
113-689B-4H-4	Larcopyle buetschlii	16	5	11	no
113-689B-4H-4	Larcopyle hayesi	80	36	44	no
113-689B-4H-4	Larcopyle labyrinthusa	164	87	77	no
113-689B-4H-4	Larcopyle peregrinator	59	20	39	no
113-689B-4H-4	Larcopyle polyacantha amplissima	5	3	2	no
113-689B-4H-4	Larcopyle polyacantha polyacantha	36	21	15	no
113-689B-4H-4	Larcopyle pylomaticus	16	5	11	no
[truncated: 14,012 more rows]
